# Supplementary material
Source: PubMed Central journal article supplement (PMC8374744)
Supplement: jamapsychiatry-e212130-s001.pdf [file jamapsychiatry-e212130-s001.pdf]

## Supplementary Online Content

Leucht S, Bauer S, Sifakis S, et al. Examination of dosing of antipsychotic drugs for relapse prevention in patients with stable schizophrenia: a meta-analysis. *JAMA Psychiatry*. Published online August 18, 2021. doi:10.1001/jamapsychiatry.2021.2130

**eAppendix 1.** Dose Response Meta-analysis of Antipsychotic Drugs for Relapse Prevention in Schizophrenia (protocol)

**eAppendix 2.** Description of the Search Strategy

**eFigure.** PRISMA Diagram of the Search

**eTable 1.** Characteristics of Included Studies

**eTable 2.** Characteristics of Excluded Studies

**eReferences**

**eAppendix 3.** Assessment With the Cochrane Risk of Bias Tool, Version 2

**eAppendix 4.** Individual Drugs and Additional Sensitivity/Subgroup Analyses

**eAppendix 5.** Conversion to Absolute Rates, Relative Risks, and PANSS Units

**eAppendix 6.** Heterogeneity and Small Trial/Publication Bias

**eAppendix 7.** Update of the Meta-analysis of Uchida et al (2011) and Additional Analyses of Doses Higher Than Standard Doses ( $\geq 5$ mg Risperidone Equivalent per Day)

**eTable 3.** Average Dopamine Receptor Occupancies for Risperidone Doses

This supplementary material has been provided by the authors to give readers additional information about their work.

# eAppendix 1. Dose response meta-analysis of antipsychotic drugs for relapse prevention in schizophrenia

Sofia Bauer, Tasnim Hamza, Spyridon Sifis, Hui Wu, MD, Johannes Schneider-Thoma, MD, Georgia Salanti, PhD, John M Davis, MD, Stefan Leucht, MD

## Review question

Antipsychotic drugs are the mainstay of treatment of schizophrenia. The antipsychotic doses which are effective for the acute treatment of the disorder have been relatively well established (Leucht et al. *American Journal of Psychiatry* 2019;177:342-53). It is, however, unclear whether lower doses are sufficient for maintenance treatment (relapse prevention) than in the acute phase. To know this would be important due reduce the side-effects of antipsychotics to a minimum. We aim to fill this gap by dose-response meta-analysis of randomized controlled trials. Two separate publications are planned. One on efficacy with the primary outcome relapse (study defined) and one on the major side-effects of antipsychotics drugs, i.e. 1) at least one side-effect (primary outcome), 2) weight gain, 3) extrapyramidal side-effects, 4) prolactin increase, 5) QTc prolongation, 6) sedation.

## Searches

1. Electronic databases: We will search the Cochrane Schizophrenia Group's Study-Based Register of Trials. The search strategy is: (\*Amisulpride Dosage\* OR \*Aripiprazole Dosage\* OR \*Asenapine Dosage\* OR \*Brexipiprazole Dosage\* OR \*Cariprazine Dosage\* OR \*Clozapine Dosage\* OR \*Haloperidol Decanoate Dosage\* OR \*Haloperidol Dosage\* OR \*Iloperidone Dosage\* OR \*Lumateperone Dosage\* OR \*Lurasidone Dosage\* OR \*Olanzapine Dosage\* OR \*Paliperidone Dosage\* OR \*Paliperidone Palmitate Dosage\* OR \*Quetiapine Dosage\* OR \*Risperidone Dosage\* OR \*Sertindole Dosage\* OR \*Ziprasidone Dosage\* OR \*Zotepine Dosage\*) in Pairwise Comparison Field of Study Records. This register is compiled of regular searches in multiple electronic databases, clinicaltrials.gov, WHO register of clinical trials and more. Details on the register can be found in (Shokraneh and Adams *Systematic Reviews* 2019;8:129, Shokraneh and Adams *BioImpacts* : BI 2017;7:209-17, *Health Information and Libraries Journal* 2020, *Schizophrenia Bulletin Open* 2020).
2. Previous reviews: We will search the studies of a Cochrane review on the effects of antipsychotic drugs for maintenance treatment in general (Leucht et al. *Cochrane Database Syst Rev* 2012;Cd008016, Ceraso et al. *Cochrane Database Syst Rev* 2020). For this review exhaustive searches had been undertaken.
3. Reference searching: Reference lists of newly included records will be hand-searched for potentially relevant studies.
4. We will contact authors or pharmaceutical companies for missing data of studies published from 1990 onward as long as e-mail addresses were available.

There will be no date/time, language, document type, and publication status limitations. All publications will be selected independently by at least two reviewers. In case of doubt, a third reviewer (SL and JST) will be involved. If this procedure does not lead to resolution of the issue, the study authors will be contacted.

## Search strategy

### Types of study to be included

- Randomized controlled trials (RCTs) with at least one fixed, antipsychotic dose versus a placebo (active or inactive, e.g. a benzodiazepine) or RCTs which compared at least two fixed doses of the same antipsychotic will be included.
- Both open and blinded trials.
- In case of crossover trials, only data from the first of cross-over phase will be used in order to avoid carry-over effects (Elbourne et al. *Int J Epidemiol* 2002;31:140-9)

- Cluster randomized trials will be excluded due to the unit-of-analysis-problems associated with this design (Whiting-O'Keefe et al. *Med Care* 1984;22:1101-14).
- Studies with a high risk of bias in terms of randomization according the Cochrane risk of bias tool will be excluded.
- There will be no language restriction. Studies from mainland China will be excluded due to frequent quality problems (Tong et al. *BMC Med Res Methodol* 2018;18:96). The reports are usually short making it impossible to detect these problems and authors often do not reply to requests in our experience. Studies conducted in China by international companies will be accepted.
- The minimum study duration will at least 14 weeks. The rationale of this cutoff is to exclude short-term trials which usually examine acutely ill patients with schizophrenia. The purpose of the cutoff therefore is to reduce clinical and methodological heterogeneity. It corresponds to the category for short-term trials of the Cochrane Schizophrenia Group (<https://schizophrenia.cochrane.org>). There will be no a priori defined maximum duration, although we expect that few studies will last longer than 1 year and that the longest trial duration will be 3 years (Ceraso et al. *Cochrane Database Syst Rev* 2020).
- We will include both, studies which randomize participants in their maintenance phase, and so-called continuation studies, as long as all acute phase responders could be followed up. Continuation are studies in which patients are randomized in the acute phase, and the responders in the acute phase are then followed up and examined for relapse prevention. Designs that allow that participants switch from one randomised group to the other will be excluded. This kind of trials is, for example, often used in cost effectiveness studies, but it is not appropriate to compare the effects of different doses of one drug.
- Studies on the acute treatment of schizophrenia will be excluded.

## Condition or domain being studied

Schizophrenia and schizophrenia-related disorder

## Participants/population

- Participants with a diagnosis of schizophrenia or schizophrenia-related disorders, e.g. schizophreniform or schizoaffective disorders. We will accept both clinical diagnosis and diagnosis based on operationalized diagnostic criteria. Studies including participants with a diagnosis other than schizophrenia-related disorders will be accepted when the at least 80% of the participants had diagnoses with schizophrenia-related disorders.
- Participants must be in the stable phase of their illness, we will exclude studies in acutely ill patients. Any definition of "stability" will be accepted, because no uniform definition is available.
- Studies in children and adolescents, in elderly patients, in participants with predominant negative symptoms and in participants with a first-episode of schizophrenia will be analyzed separately, because there is evidence that such patients need lower doses, at least in the acute phase (Oosthuizen et al. *Int J Neuropsychopharmacol* 2004;7:125-31, Krause et al. *Eur Neuropsychopharmacol* 2018;28:659-74, Krause et al. *Eur Arch Psychiatry Clin Neurosci* 2018;268:625-39, Krause et al. *Eur Neuropsychopharmacol* 2018;28:1360-70). It is planned to analyze these populations in separate publications. Studies in treatment resistant patients and in patients with concomitant substance abuse will be analyzed together with the studies on general adults with schizophrenia, but they will be excluded in a sensitivity analysis (Krause et al. *Eur Neuropsychopharmacol* 2019;29:32-45).
- There will be no other restriction in terms of setting, gender, nationality and ethnicity.

## Intervention(s), exposure(s)

- Any of the following antipsychotic drugs will be eligible: amisulpride, aripiprazole (oral, depot formulations of maintena and lauroxil), asenapine (oral and transdermal), brexpiprazole, cariprazine, clozapine, haloperidol (oral and depot), fluphenazine, iloperidone, lumateperone, lurasidone, olanzapine (oral and depot), quetiapine, paliperidone (oral and depot), risperidone (oral, depot formulations of consta and RBP-7000), sertindole, ziprasidone, zotepine. This selection comprises all so-called second-generation antipsychotic drugs available in Europe and/or the US. Haloperidol will also be examined, because it was the gold standard in many countries before these

more recent drugs had been developed. As the depot formulation of fluphenazine was the best investigated drug for dose-response before the advent of the second-generation antipsychotics, we included this other standard first-generation antipsychotic, as well.

- There will be no restriction in terms of route of administration (except for short-acting injections and intranasal forms that are used for acute agitation). Antipsychotic compounds given via different route of administration will be considered as separate compounds. For example, oral aripiprazole, aripiprazole maintena and aripiprazole lauroxil will be considered as three separate antipsychotic interventions. In a similar vein for oral asenapine/transdermal asenapine, oral paliperidone/paliperidone depot once monthly, risperidone/risperidone consta/risperidone RBP-7000, olanzapine/olanzapine depot.
- Fixed-dose schedules, and studies in which patients are randomised to different, narrow, non-overlapping, fixed dose range, for example olanzapine 5mg/day +/- 2.5 mg/day versus olanzapine 10mg/day +/-2.5mg/day. Flexible-dosing schedules will not be eligible.

### Comparator(s)/control

Placebo, active of non-active.

### Context

We will include studies in outpatient and in inpatient settings as long as the patients are stable at baseline. We will not generally exclude inpatient studies, because there might be studies which have been conducted in long-term wards for stable patients. The detailed in- and exclusion criteria are listed above.

### Main outcome(s)

We plan two separate publications, one with a focus on efficacy, the other one on different side-effects. We wrote one protocol, because the overall methodology and the searches will be the same. The following are the outcomes for the efficacy focused review.

The number of participants relapsed (study defined)

We will accept any definition of relapse. Different definitions have been used in the literature and that there is no consensus as to which is the most appropriate one. We will, however, prefer relapse criteria which are operationalized by rating scales rather than other criteria that we will extract following this hierarchy a) 'patient relapsed by the judgment of the clinician/rater', b) need for additional antipsychotic medication c) dropout due to inefficacy d) re-hospitalisation and e) and other.

The primary outcome relapse will be extracted at 6 months, 9 months, 12 months and longer than 12 months. We will statistically analyze the outcome closest to 12 months. All other outcomes will be measured at study endpoint.

### \* Measures of effect

Relapse will be analyzed with odds ratios. Also see section 'strategy for data synthesis'.

### Additional outcome(s)

The following secondary outcomes will be analysed in the review.

1. Mean change from baseline to endpoint of overall symptoms of schizophrenia as measured by the Positive and Negative Syndrome Scale (Kay et al. Schizophr Bull 1987;13:261-76), the Brief Psychiatric Rating Scale (Overall and Gorham Psychological Reports 1962;10:799-812) or any other published scale to measure the symptoms of schizophrenia.
2. Premature study discontinuation due to any reason. This outcome is actually a measure of effectiveness, because it comprises dropouts due to side-effects, inefficacy and others.
3. Rehospitalisation for psychiatric reasons
4. Premature study discontinuation due to adverse events, where dropouts due to side-effects were preferred whenever available.

## \* Measures of effect

Rating scales of schizophrenia symptoms will be analyzed with the standardized mean difference, because we expect that different scales have been used in the studies. All other outcomes are dichotomous for which odds ratios will be used as measures of effect. Also see section 'strategy for data synthesis'.

## Data extraction (selection and coding)

1. Selection of trials: At least two reviewers will independently inspect the titles and abstracts of non-duplicated references identified through the search and will exclude those not pertinent. Discrepancies between the two reviewers will be resolved by discussion. If doubts still remain, the full text will be obtained and eligibility will be assessed. Full texts of included references will be obtained and independently assessed by two reviewers for eligibility. Again, disagreements will be resolved by discussion and, if needed, a third author will be involved (SL or JST). When required, further information will be requested from study authors.

2. Data extraction: Two authors will independently extract data from all selected trials in a Microsoft Access database. When disagreement arises, we will resolve it by discussion and, if needed, involving a third senior author (SL or JST). Where this is not sufficient, we will contact the study authors.

- When authors of original studies used imputation methods to handle missing data, we will prefer them to completers' data. For the outcome relapse we will prefer data based on survival analysis rather than the absolute number of participants relapsed. In terms of continuous data mixed-models of repeated measurement (MMRM), multiple imputation will be preferred over last-observation carried forward (LOCF), if available.
- For dichotomous outcomes, if only completer analyses are presented, we will assume that participants lost to follow-up did not have the outcome. We think that another assumption would overestimate the risk.
- For continuous outcomes, we will prefer change scores to follow-up data, but we will also accept the latter when the former are not available.
- Missing SDs will be calculated from 1) standard error (SE), 2) other measures of variability (95% confidence intervals, ranges etc), 3) test statistics 4) imputed from the SDs of the other studies using a validated method (Furukawa et al. *J Clin Epidemiol* 2006;59:7-10) according to the Cochrane Handbook (Higgins and Green 2011;4).

## Risk of bias (quality) assessment

Two independent review authors will assess the risk of bias in the selected studies using the 'Cochrane Collaboration risk of bias' tool version 2 (Sterne et al. *Bmj* 2019;366:l4898). When disagreement arises we will resolve it by discussion and, if needed, involving a third senior author.

## Strategy for data synthesis

- In the efficacy publication we will – in addition to analyzing each antipsychotic separately - pool all studies after converting the doses to risperidone equivalents based on the following criteria: Dose equivalence based on 95% Effective Doses (Leucht et al. *American Journal of Psychiatry* 2019;177:342-53), if not available Minimum Effective Dose method (Leucht et al. *Schizophr Bull* 2014;40:314-26, Rothe et al. *Schizophr Res* 2018;193:23-8), if not available Mean Dose method (Leucht et al. *Schizophr Bull* 2015;41:1397-402, Davis *J Psychiatr Res* 1974;11:65-9), if not available Daily Defined Dose method (Leucht et al. *Schizophr Bull* 2016;42 Suppl 1:S90-4) if not available based on the International Consensus of Antipsychotic Doses (David M. Gardner et al. *American Journal of Psychiatry* 2010;167:686-93). In a secondary analysis we will convert doses based on the expert opinions according to the International Consensus of Antipsychotic Doses (David M. Gardner et al. *American Journal of Psychiatry* 2010;167:686-93) supplemented by similar judgements by the reviewer team for drugs that were not reported in the consensus statement.

- The effect sizes for dichotomous outcomes will be the odds ratio (OR). The effect sizes for continuous rating scales for efficacy we will use the standardized mean difference (SMD as Hedges' g), because we expect that various scales have been used in the studies to measure the same concepts. All effect sizes will be accompanied by their 95% confidence intervals.
- We will conduct a one-stage dose response meta-analysis in a frequentist framework using restricted-cubic splines with the R package 'dosresmeta' developed by Crippa et al (Crippa et al. Stat Methods Med Res 2019;28:1579-96, Crippa and Orsini Journal of Statistical Software 2016;72). We will use knot points at the 25<sup>th</sup>, 50<sup>th</sup> and 75<sup>th</sup> percentile.
- We will produce absolute dose-response curves: we will synthesize the effects in the placebo arms and we will transform the relative dose-response curves estimated in previous steps to absolute curves.
- For drugs with enough data we will use the Wald statistic to explore whether there is evidence of an overall dose-response relationship and we will report the p-values.
- We will use the dose-response curves to estimate the 95% effective dose (ED95) and 50% effective dose (ED50) as is customary in dose-response analysis (1, 4). The ED50 is the mean dose that produces 50% of the maximum relapse prevention compared with placebo, and the ED95 is the mean dose that produces 95% of the maximum reduction. The ED50 and the ED95 will be calculated for each drug separately and for all drugs pooled.
- Small study effects and the possibility of publication bias will be assessed with funnel plots and Egger's test, when there are at least 10 studies available.

### Analysis of subgroups or subsets

Predefined sensitivity analyses of the primary outcomes will be:

- In the primary analysis, we will synthesize studies that compared at least two doses of a compound with placebo. In a sensitivity analysis we will exclude studies that compared only a *single* dose of an antipsychotic with placebo, because such studies were not designed to address dose-response and could therefore produce methodological heterogeneity.
- Immediate (IR) and extended release (XR) formulations will be analyzed separately (i.e. for quetiapine).
- We will exclude open RCTs for subjective outcomes.
- We will examine the subgroup of patients in remitted (added post-hoc).

### References

1. Leucht S, Crippa A, Sifis S, Patel MX, Orsini N, Davis JM. Dose-Response Meta-Analysis of Antipsychotic Drugs for Acute Schizophrenia. American Journal of Psychiatry. 2019;177:342-53.
2. Shokraneh F, Adams CE. Study-based registers reduce waste in systematic reviewing: discussion and case report. Systematic Reviews. 2019;8:129.
3. Shokraneh F, Adams CE. Study-based registers of randomized controlled trials: Starting a systematic review with data extraction or meta-analysis. BiolImpacts : BI. 2017;7:209-17.
4. Shokraneh F, Adams CE. Classification of all pharmacological interventions tested in trials relevant to people with schizophrenia: A study-based analysis. Health Information and Libraries Journal. 2020.
5. Shokraneh F, Adams CE. Cochrane Schizophrenia Group's Study-Based Register of Randomized Controlled Trials: Development and Content Analysis. Schizophrenia Bulletin Open. 2020.
6. Leucht S, Tardy M, Komossa K, Heres S, Kissling W, Davis JM. Maintenance treatment with antipsychotic drugs for schizophrenia. Cochrane Database Syst Rev. 2012:Cd008016.
7. Ceraso A, Lin J, Schneider-Thoma J, Sifis S, Tardy M, Komossa K, Heres S, Kisslin W, Davis JM, Leucht S. Maintenance treatment with antipsychotic drugs for schizophrenia. Cochrane Database Syst Rev. 2020.
8. Elbourne DR, Altman DG, Higgins JP, Curtin F, Worthington HV, Vail A. Meta-analyses involving cross-over trials: methodological issues. Int J Epidemiol. 2002;31:140-9.
9. Whiting-O'Keefe QE, Henke C, Simborg DW. Choosing the correct unit of analysis in Medical Care experiments. Med Care. 1984;22:1101-14.
10. Tong Z, Li F, Ogawa Y, Watanabe N, Furukawa TA. Quality of randomized controlled trials of new generation antidepressants and antipsychotics identified in the China National Knowledge Infrastructure (CNKI): a literature and telephone interview study. BMC Med Res Methodol. 2018;18:96.

11. Oosthuizen P, Emsley R, Jadri Turner H, Keyter N. A randomized, controlled comparison of the efficacy and tolerability of low and high doses of haloperidol in the treatment of first-episode psychosis. *Int J Neuropsychopharmacol.* 2004;7:125-31.
12. Krause M, Zhu Y, Huhn M, Schneider-Thoma J, Bighelli I, Chaimani A, Leucht S. Efficacy, acceptability, and tolerability of antipsychotics in children and adolescents with schizophrenia: A network meta-analysis. *Eur Neuropsychopharmacol.* 2018;28:659-74.
13. Krause M, Zhu Y, Huhn M, Schneider-Thoma J, Bighelli I, Nikolakopoulou A, Leucht S. Antipsychotic drugs for patients with schizophrenia and predominant or prominent negative symptoms: a systematic review and meta-analysis. *Eur Arch Psychiatry Clin Neurosci.* 2018;268:625-39.
14. Krause M, Huhn M, Schneider-Thoma J, Rothe P, Smith RC, Leucht S. Antipsychotic drugs for elderly patients with schizophrenia: A systematic review and meta-analysis. *Eur Neuropsychopharmacol.* 2018;28:1360-70.
15. Krause M, Huhn M, Schneider-Thoma J, Bighelli I, Gutsmedl K, Leucht S. Efficacy, acceptability and tolerability of antipsychotics in patients with schizophrenia and comorbid substance use. A systematic review and meta-analysis. *Eur Neuropsychopharmacol.* 2019;29:32-45.
16. Kay SR, Fiszbein A, Opler LA. The positive and negative syndrome scale (PANSS) for schizophrenia. *Schizophr Bull.* 1987;13:261-76.
17. Overall JE, Gorham DR. The Brief Psychiatric Rating Scale. *Psychological Reports.* 1962;10:799-812.
18. Simpson GM, Angus JW. A rating scale for extrapyramidal side effects. *Acta Psychiatr Scand Suppl.* 1970;212:11-9.
19. Chouinard G, Margolese HC. Manual for the Extrapyramidal Symptom Rating Scale (ESRS). *Schizophr Res.* 2005;76:247-65.
20. Barnes TRE. A rating scale for drug-induced akathisia. *Br J Psychiatry.* 1989;154:672-6.
21. Schooler NR, Kane JM. Research diagnoses for tardive dyskinesia. *Arch Gen Psychiatry.* 1982;39:486-7.
22. Furukawa TA, Barbui C, Cipriani A, Brambilla P, Watanabe N. Imputing missing standard deviations in meta-analyses can provide accurate results. *J Clin Epidemiol.* 2006;59:7-10.
23. Higgins JPT, Green S: *Cochrane handbook for systematic reviews of interventions*, John Wiley & Sons; 2011.
24. Sterne JAC, Savovic J, Page MJ, Elbers RG, Blencowe NS, Boutron I, Cates CJ, Cheng HY, Corbett MS, Eldridge SM, Emberson JR, Hernan MA, Hopewell S, Hrobjartsson A, Junqueira DR, Juni P, Kirkham JJ, Lasserson T, Li T, McAleenan A, Reeves BC, Shepperd S, Shrier I, Stewart LA, Tilling K, White IR, Whiting PF, Higgins JPT. RoB 2: a revised tool for assessing risk of bias in randomised trials. *Bmj.* 2019;366:l4898.
25. Leucht S, Samara M, Heres S, Patel MX, Woods SW, Davis JM. Dose equivalents for second-generation antipsychotics: the minimum effective dose method. *Schizophr Bull.* 2014;40:314-26.
26. Rothe PH, Heres S, Leucht S. Dose equivalents for second generation long-acting injectable antipsychotics: The minimum effective dose method. *Schizophr Res.* 2018;193:23-8.
27. Leucht S, Samara M, Heres S, Patel MX, Furukawa T, Cipriani A, Geddes J, Davis JM. Dose Equivalents for Second-Generation Antipsychotic Drugs: The Classical Mean Dose Method. *Schizophr Bull.* 2015;41:1397-402.
28. Davis JM. Dose equivalence of the antipsychotic drugs. *J Psychiatr Res.* 1974;11:65-9.
29. Leucht S, Samara M, Heres S, Davis JM. Dose Equivalents for Antipsychotic Drugs: The DDD Method. *Schizophr Bull.* 2016;42 Suppl 1:S90-4.
30. David M. Gardner, Pharm.D., M.Sc., Andrea L. Murphy, Pharm.D., Heather O'Donnell, B.Sc. Pharm., Franca Centorrino, M.D., and, Ross J. Baldessarini, M.D. International Consensus Study of Antipsychotic Dosing. *American Journal of Psychiatry.* 2010;167:686-93.
31. Huhn M, Nikolakopoulou A, Schneider-Thoma J, Krause M, Samara M, Peter N, Arndt T, Backers L, Rothe P, Cipriani A, Davis J, Salanti G, Leucht S. Comparative efficacy and tolerability of 32 oral antipsychotics for the acute treatment of adults with multi-episode schizophrenia: a systematic review and network meta-analysis. *Lancet.* 2019;394:939-51.
32. Crippa A, Discacciati A, Bottai M, Spiegelman D, Orsini N. One-stage dose-response meta-analysis for aggregated data. *Stat Methods Med Res.* 2019;28:1579-96.
33. Crippa A, Orsini N. Multivariate Dose-Response Meta-Analysis: The dosresmeta R Package. *Journal of Statistical Software.* 2016;72.

#### Changes to the original protocol published in Prospero

- This version refers to the efficacy focussed review, additional ones on specific side-effects are planned. This decision was made a priori, see first paragraph of the protocol.

- We added a subgroup analysis of patients in remission at baseline. The single first-episode study was analysed together with the studies in chronic patients, but excluded in a sensitivity analysis. Similarly, due to a relative scarcity of data we pooled oral and depot formulations, but we also analysed both separately (data not shown).

95% and 50% effective doses were not calculated.

- The outcome rehospitalisation for psychiatric reasons was analysed separately in addition to its analysis as an indicator for relapse.

- Following reviewer requests we tested with linear splines up to which dose the dose-response curve still showed a significantly increasing slope, and added subgroup analyses on long-acting injectable versus oral medications, first-generation versus second-generation antipsychotics, percentage male and age.



## eAppendix 2. . Description of the search strategy

### 1 Database

Cochrane Schizophrenia Group's Study-Based Register of Trials. Details are also described on the Cochrane Schizophrenia Group's website <https://schizophrenia.cochrane.org/>.

### 2 Date of search

9<sup>th</sup> March 2020

### 3 Search Strategy

**Strategy:** (\*Amisulpride Dosage\* OR \*Aripiprazole Dosage\* OR \*Asenapine Dosage\* OR \*Brexiprazole Dosage\* OR \*Cariprazine Dosage\* OR \*Clozapine Dosage\* OR \*Fluphenazine Dosage\* OR \*Haloperidol Decanoate Dosage\* OR \*Haloperidol Dosage\* OR \*Iloperidone Dosage\* OR \*Lumateperone Dosage\* OR \*Lurasidone Dosage\* OR \*Olanzapine Dosage\* OR \*Paliperidone Dosage\* OR \*Paliperidone Palmitate Dosage\* OR \*Quetiapine Dosage\* OR \*Risperidone Dosage\* OR \*Sertindole Dosage\* OR \*Ziprasidone Dosage\* OR \*Zotepine Dosage\*) in Pairwise Comparison Field of Study Records

### 4 Search Results

There were 1306 references from 390 studies.

### 5 References to database details

1. Shokraneh, Farhad; Adams, Clive E. Classification of all pharmacological interventions tested in trials relevant to people with schizophrenia: A study-based analysis. *Health Information and Libraries Journal* 2020; Accepted
2. Shokraneh, Farhad; Adams, Clive E. Cochrane Schizophrenia Group's Study-Based Register of Randomized Controlled Trials: Development and Content Analysis. *Schizophrenia Bulletin Open* 2020; Under Review.
3. Shokraneh, Farhad; Adams, Clive E. Study-based registers reduce waste in systematic reviewing: discussion and case report. *Systematic Reviews* 2019; 8: 129. DOI 10.1186/s13643-019-1035-3
4. Shokraneh, Farhad; Adams, Clive E. Study-based registers of randomized controlled trials: Starting a systematic review with data extraction or meta-analysis. *BioImpacts* 2017; 7(4): 209-217. DOI 10.15171/bi.2017.25

### 5 Update search in Pubmed January 1<sup>st</sup> 2021

Search: (amisulpride OR aripiprazole OR asenapine OR brexpiprazole OR cariprazine OR clozapine OR fluphenazine OR haloperidol\* OR iloperidone OR lumateperone OR lurasidone OR olanzapine OR paliperidone OR quetiapine OR risperidone OR sertindole OR ziprasidone OR zotepine) Filters: Randomized Controlled Trial, From 2020/1/1 to 2021/1/1

28 selected items

**eFigure. PRISMA diagram of the search**

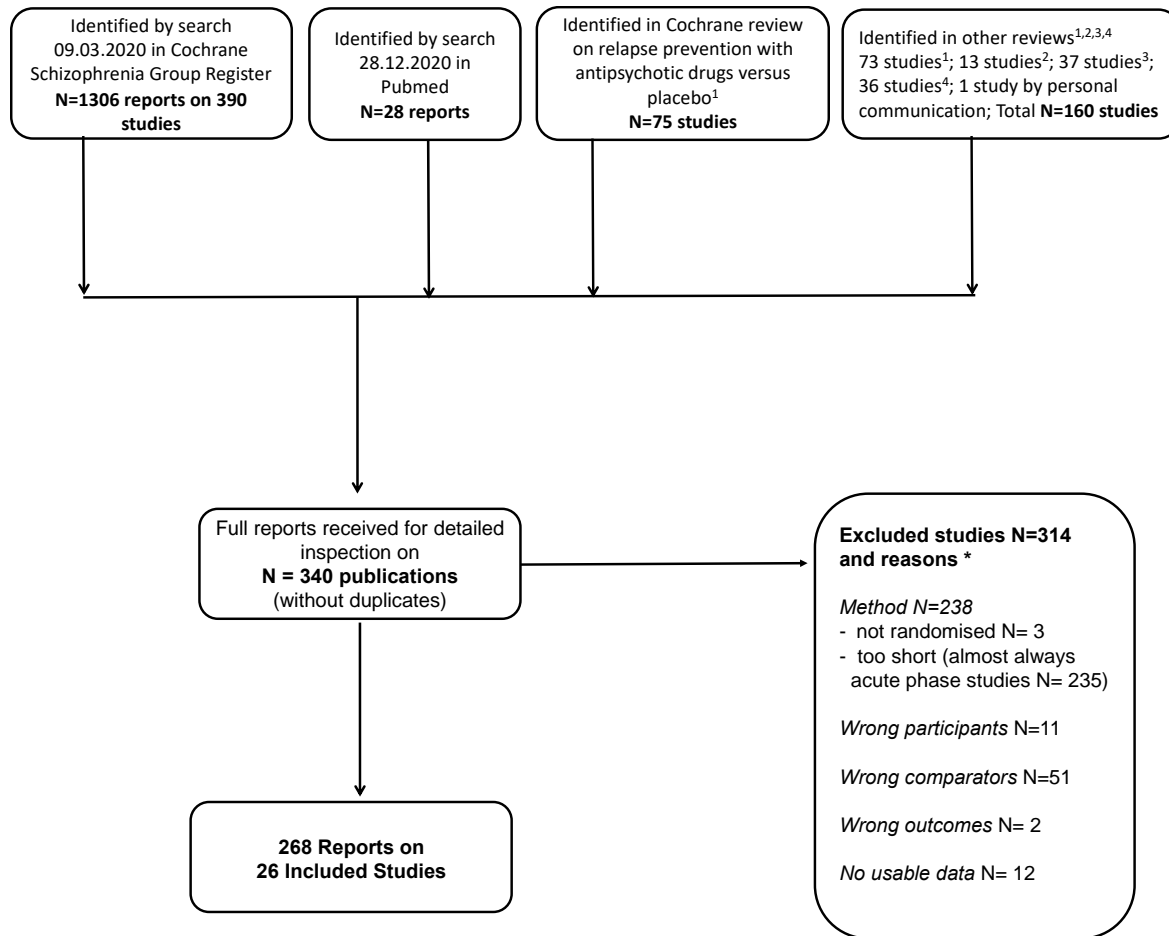

N = number of studies, \* some publications provided data on two studies

**References**

1. Ceraso A, Lin J, Schneider-Thoma J, Sifakis S, Tardy M, Komossa K, Heres S, Kisslin W, Davis JM, Leucht S. Maintenance treatment with antipsychotic drugs for schizophrenia. *Cochrane Database Syst Rev.* 2020.
2. Rothe PH, Heres S, Leucht S. Dose equivalents for second generation long-acting injectable antipsychotics: The minimum effective dose method. *Schizophr Res Jul 21 2017.*
3. Uchida H, Suzuki T, Takeuchi H, Arenovich T, Mamo DC. Low dose vs standard dose of antipsychotics for relapse prevention in schizophrenia: meta-analysis. *Schizophr Bull.* 2011;37(4):788-99.
4. Tani H, Takasu S, Uchida H, Suzuki T, Mimura M, Takeuchi H. Factors associated with successful antipsychotic dose reduction in schizophrenia: a systematic review of prospective clinical trials and meta-analysis of randomized controlled trials. *Neuropsychopharmacology : official publication of the American College of Neuropsychopharmacology.* 2020;45(5):887-901.
5. Leucht S, Samara M, Rodolico A, Bauer I, Bäckers L, Bighelli I. S204. Reduction of antipsychotic doses and polypharmacy: two Cochrane reviews. *Schizophrenia Bulletin.* 2020;46(Supplement\_1):S116-S.

**eTable1: Characteristics of Included Studies**

| Study                                                                  | Year of Publication | Degree of blinding | Duration (wks) | Diagnostic term (diagnostic criteria) | Interventions       | Application | Dosing interval | Dose mean and range mg | Number of patients randomized | Mean age in years |
|------------------------------------------------------------------------|---------------------|--------------------|----------------|---------------------------------------|---------------------|-------------|-----------------|------------------------|-------------------------------|-------------------|
| Arato et al 2002(1)                                                    | 2002                | double blind       | 52             | Schizophrenia (DSM-III-R)             | Placebo             | oral        | -               | -                      | 71                            | 48.7              |
|                                                                        |                     |                    |                |                                       | Ziprasidone 160mg   | oral        | daily           | 160 (160-160)          | 67                            | 49.6              |
|                                                                        |                     |                    |                |                                       | Ziprasidone 40mg    | oral        | daily           | 40 (40-40)             | 72                            | 50.8              |
|                                                                        |                     |                    |                |                                       | Ziprasidone 80mg    | oral        | daily           | 80 (80-80)             | 68                            | 49.8              |
| Velligan et al 2002(2) (unpublished data obtained)                     | 1995                | double blind       | 52             | Schizophrenia (DSM-III-R)             | Haloperidol         | oral        | daily           | 12 (12-12)             | 41                            | 37                |
|                                                                        |                     |                    |                |                                       | Quetiapine 300mg    | oral        | daily           | 300 (300-300)          | 88                            | 37                |
|                                                                        |                     |                    |                |                                       | Quetiapine 600mg    | oral        | daily           | 600 (600-600)          | 87                            | 38                |
|                                                                        |                     |                    |                |                                       | Quetiapine 75mg     | oral        | daily           | 75 (75-75)             | 85                            | 39                |
| Beasley et al 1996a (Study F1M-MC-HGAD)(3) (unpublished data obtained) | 1996                | double blind       | 46             | Schizophrenia (DSM-III-R)             | Haloperidol 15±5mg  | oral        | daily           | 15.8 (10-20)           | 10                            | 36.1              |
|                                                                        |                     |                    |                |                                       | Olanzapine 10±2.5mg | oral        | daily           | 11.6 (7.5-12.5)        | 9                             | 40.9              |
|                                                                        |                     |                    |                |                                       | Olanzapine 15±2.5mg | oral        | daily           | 15.8 (12.5-17.5)       | 22                            | 34.4              |
|                                                                        |                     |                    |                |                                       | Olanzapine 5±2.5mg  | oral        | daily           | 6.3 (2.5-7.5)          | 14                            | 33.5              |
|                                                                        |                     |                    |                |                                       | Placebo             | oral        | -               | -                      | 13                            | 36.1              |
| Beasley et al 1997 (Study                                              | 1997                | double blind       | 46             | Schizophrenia (DSM-III-R)             | Haloperidol 15±5mg  | oral        | daily           |                        | 28                            | 34.9              |

|                                                |      |              |    |                                                                                                                                                                                                                                                                                                                                                                                                                                                                      |                           |       |               |                 |    |      |
|------------------------------------------------|------|--------------|----|----------------------------------------------------------------------------------------------------------------------------------------------------------------------------------------------------------------------------------------------------------------------------------------------------------------------------------------------------------------------------------------------------------------------------------------------------------------------|---------------------------|-------|---------------|-----------------|----|------|
| F1D-EW-E003)(3)<br>(unpublished data obtained) |      |              |    |                                                                                                                                                                                                                                                                                                                                                                                                                                                                      | Olanzapine 1±2.5mg        | oral  | daily         | 1 (1-1)         | 33 | 34.0 |
|                                                |      |              |    |                                                                                                                                                                                                                                                                                                                                                                                                                                                                      | Olanzapine 10±2.5mg       | oral  | daily         | 11.3 (7.5-12.5) | 40 | 36.5 |
|                                                |      |              |    |                                                                                                                                                                                                                                                                                                                                                                                                                                                                      | Olanzapine 15±5mg         | oral  | daily         | 16.1(12.5-17.5) | 43 | 37.6 |
|                                                |      |              |    |                                                                                                                                                                                                                                                                                                                                                                                                                                                                      | Olanzapine 5±2.5mg        | oral  | daily         | 6.6 (2.5-7.5)   | 31 | 35.2 |
| Carpenter et al 1999(4)                        | 1999 | double blind | 54 | Schizophrenia or schizoaffective disorder (DSM-III-R)                                                                                                                                                                                                                                                                                                                                                                                                                | Fluphenazine 25mg/2 weeks | depot | every 2 weeks | 25 (25-25)      | 25 | 34.7 |
|                                                |      |              |    |                                                                                                                                                                                                                                                                                                                                                                                                                                                                      | Fluphenazine 25mg/6 weeks | depot | every 6 weeks | 25 (25-25)      | 25 | 36.2 |
| Chen et al 2010(5)#                            | 2010 | double blind | 52 | First-episode outpatients with schizophrenia or related disorders (DSM-IV). <u>Remission criteria:</u> no history of relapse in the last 12 months (defined as any increase in positive symptoms leading to adjustment of drug treatment or readmission to hospital, ascertained with information from patients, carers, case managers, clinicians, and clinical records). All were non-psychotic at study entry as defined by having below threshold scores on five | Placebo                   | oral  | -             | -               | 89 | 24.9 |
|                                                |      |              |    |                                                                                                                                                                                                                                                                                                                                                                                                                                                                      | Quetiapine                | oral  | daily         | 400 (400-400)   | 89 | 23.5 |

|                             |      |              |     |                                                                                                                                                                                                                                                                                      |                               |       |               |                |     |      |
|-----------------------------|------|--------------|-----|--------------------------------------------------------------------------------------------------------------------------------------------------------------------------------------------------------------------------------------------------------------------------------------|-------------------------------|-------|---------------|----------------|-----|------|
|                             |      |              |     | key psychotic symptoms on the PANSS: P1 delusions $\leq 2$ , P2 conceptual disorganization $\leq 3$ , P3 hallucinatory behavior $\leq 2$ , P6 suspiciousness $\leq 4$ , G9 Unusual thought content $\leq 3$ ; and $\leq 2$ (borderline or questionable illness) on the CGI severity. |                               |       |               |                |     |      |
| Cooper et al 2000(6)        | 2000 | double blind | 26  | Schizophrenia (DSM-III-R)                                                                                                                                                                                                                                                            | Placebo                       | oral  | -             | -              | 58  | 41.6 |
|                             |      |              |     |                                                                                                                                                                                                                                                                                      | Zotepine                      | oral  | daily         | n.i. (150-300) | 63  | 43   |
| Dotti et al 1979(7)         | 1979 | double blind | 39  | Schizophrenia (Clinical diagnosis)                                                                                                                                                                                                                                                   | Fluphenazine                  | depot | every 4 weeks | n.i. (25-50)   | 10  | n.i. |
|                             |      |              |     |                                                                                                                                                                                                                                                                                      | Placebo                       | depot | -             | -              | 10  | n.i. |
| Eklund et al 1991(8)        | 1991 | double blind | 48  | Schizophrenia (Research Diagnostic Criteria (RDC))                                                                                                                                                                                                                                   | Haloperidol                   | depot | every 4 weeks | 60 (60-60)     | 20  | 51.7 |
|                             |      |              |     |                                                                                                                                                                                                                                                                                      | Placebo                       | depot | -             | -              | 23  | 51.7 |
| Fleischhacker et al 2014(9) | 2014 | double blind | 38  | Schizophrenia (DSM-IV-TR)                                                                                                                                                                                                                                                            | Aripiprazole LAI 400mg/4weeks | depot | every 4 weeks | 392 (300-400)  | 265 | 41.7 |
|                             |      |              |     |                                                                                                                                                                                                                                                                                      | Aripiprazole LAI 50mg/4weeks  | depot | every 4 weeks | 50 (25-50)     | 131 | 40.2 |
| Hough et al 2009(10)        | 2009 | double blind | 25  | Schizophrenia (DSM-IV)                                                                                                                                                                                                                                                               | Paliperidone 100mg            | depot | every 4 weeks | 100 (100-100)  | 86  | 43   |
|                             |      |              |     |                                                                                                                                                                                                                                                                                      | Paliperidone 50mg             | depot | every 4 weeks | 50 (50-50)     | 82  | 43   |
|                             |      |              |     |                                                                                                                                                                                                                                                                                      | Paliperidone 75mg             | depot | every 4 weeks | 75 (75-75)     | 84  | 43   |
| Huttunen et al 1996(11)     | 1996 | open-label   | 104 | Schizophrenia (DSM-III-R)                                                                                                                                                                                                                                                            | Haloperidol 150mg             | depot | every 4 weeks | 150 (150-150)  | 13  | n.i. |

|                         |      |                 |    |                                                                                                                                                                                                                                                                                                                                                                                                                                             |                           |       |               |                     |    |      |
|-------------------------|------|-----------------|----|---------------------------------------------------------------------------------------------------------------------------------------------------------------------------------------------------------------------------------------------------------------------------------------------------------------------------------------------------------------------------------------------------------------------------------------------|---------------------------|-------|---------------|---------------------|----|------|
|                         |      |                 |    |                                                                                                                                                                                                                                                                                                                                                                                                                                             | Haloperidol 25mg          | depot | every 4 weeks | 25 (25-25)          | 13 | n.i. |
| Kane et al<br>1979(12)# | 1979 | double<br>blind | 26 | Schizophrenia, any<br>subtype (RDC) <u>in good<br/>remission</u> with no<br>evidence for significant<br>psychopathology and<br>with reasonably good<br>social and vocational<br>functioning for at least 6<br>months during a<br>prospective open non-<br>randomised trial with<br>fluphenazine decanoate.<br>All patients were being<br>successfully maintained<br>in the community.                                                       | Fluphenazine              | depot | every 2 weeks | n.i. (1.25-5)       | 8  | 26.5 |
|                         |      |                 |    |                                                                                                                                                                                                                                                                                                                                                                                                                                             | Placebo                   | depot | -             | -                   | 8  | 26.9 |
| Kane et al<br>1983(13)# | 1983 | double<br>blind | 52 | Outpatients with<br>schizophrenia or<br>schizoaffective disorder<br>(RDC) in <u>remission or<br/>partial remission</u> defined<br>by GAS $\geq$ 35; BPRS $\leq$ 4<br>on conceptual<br>disorganization and<br>hallucinatory behavior, $\leq$<br>5 on suspiciousness,<br>and $\leq$ 3 on unusual<br>thought content. No<br>fluctuation in either<br>direction by more than<br>10 on the GAS and by<br>more than 1 on any of<br>the BPRS items | Fluphenazine<br>1.25-5mg  | depot | every 2 weeks | 3.125 (1.25-5)      | 66 | 28.9 |
|                         |      |                 |    |                                                                                                                                                                                                                                                                                                                                                                                                                                             | Fluphenazine<br>12.5-50mg | depot | every 2 weeks | 31.25 (12.5-<br>50) | 66 | 28.9 |

|                          |      |                 |    |                                                                                                                                                                                                                                                                                                                                             |                             |       |               |               |     |      |
|--------------------------|------|-----------------|----|---------------------------------------------------------------------------------------------------------------------------------------------------------------------------------------------------------------------------------------------------------------------------------------------------------------------------------------------|-----------------------------|-------|---------------|---------------|-----|------|
|                          |      |                 |    | mentioned. Patients were required to maintain this stability while receiving a constant IM dose of fluphenazine-decanoate within the range of 12.5 to 50mg/2week. Average number of weeks from hospital discharge to study entry 63.9+-78.5 weeks.                                                                                          |                             |       |               |               |     |      |
| Kane et al<br>2002b(14)# | 2002 | double<br>blind | 52 | Schizophrenia or schizoaffective disorder (DSM-III) outpatients with a baseline state of relative <u>remission</u> for at least 3 months during maintenance treatment with antipsychotic medication and a BPRS $\leq 3$ on conceptual disorganization and unusual thought content and $\leq 4$ on hallucinatory behavior and suspiciousness | Haloperidol 100mg           | depot | every 4 weeks | 100 (100-100) | 31  | 38   |
|                          |      |                 |    |                                                                                                                                                                                                                                                                                                                                             | Haloperidol 200mg           | depot | every 4 weeks | 200 (200-200) | 29  | 40   |
|                          |      |                 |    |                                                                                                                                                                                                                                                                                                                                             | Haloperidol 25mg            | depot | every 4 weeks | 25 (25-25)    | 29  | 38   |
|                          |      |                 |    |                                                                                                                                                                                                                                                                                                                                             | Haloperidol 50mg            | depot | every 4 weeks | 50 (50-50)    | 30  | 38   |
| Kane et al<br>2010(15)   | 2010 | double<br>blind | 24 | Schizophrenia (DSM-IV or DSM-IV-TR)                                                                                                                                                                                                                                                                                                         | Olanzapine LAI 150mg/2weeks | depot | every 2 weeks | 150 (150-150) | 140 | 37.7 |
|                          |      |                 |    |                                                                                                                                                                                                                                                                                                                                             | Olanzapine LAI 300mg/2weeks | depot | every 2 weeks | 300 (300-300) | 141 | 39.5 |

|                                                              |      |              |     |                                                                                                              |                             |       |               |                  |     |      |
|--------------------------------------------------------------|------|--------------|-----|--------------------------------------------------------------------------------------------------------------|-----------------------------|-------|---------------|------------------|-----|------|
|                                                              |      |              |     |                                                                                                              | Olanzapine LAI 405mg/4weeks | depot | every 4 weeks | 405 (405-405)    | 318 | 39   |
|                                                              |      |              |     |                                                                                                              | Olanzapine LAI 45mg/4weeks  | #NV   | n.i.          | n.i. (n.i.-n.i.) | #NV | n.i. |
| Kane et al 2012(16)                                          | 2012 | double blind | 52  | Schizophrenia (DSM-IV-TR)                                                                                    | Aripiprazole                | depot | every 4 weeks | 396.3 (300-400)  | 269 | 40.1 |
|                                                              |      |              |     |                                                                                                              | Placebo                     | depot | -             | -                | 134 | 41.7 |
| Mallikaarjun et al 2013(17)                                  | 2013 | open-label   | 24  | Schizophrenia (DSM-IV-TR)                                                                                    | Aripiprazole 200mg          | depot | every 4 weeks | 200 (200-200)    | 11  | 46   |
|                                                              |      |              |     |                                                                                                              | Aripiprazole 300mg          | depot | every 4 weeks | 300 (300-300)    | 16  | 43.3 |
|                                                              |      |              |     |                                                                                                              | Aripiprazole 400mg          | depot | every 4 weeks | 400 (400-400)    | 14  | 46.8 |
| Marder et al 1984(18)                                        | 1984 | double blind | 104 | Schizophrenia (DSM-III)                                                                                      | Fluphenazine 25mg           | depot | every 2 weeks | 25 (25-25)       | 31  | 38.1 |
|                                                              |      |              |     |                                                                                                              | Fluphenazine 5mg            | depot | every 2 weeks | 5 (5-5)          | 35  | 35.1 |
| McEvoy et al 2007 extension (19) (unpublished data obtained) | 2005 | double blind | 46  | Schizophrenia (DSM-IV)                                                                                       | Aripiprazole 10-15mg        | oral  | daily         | n.i. (10-15)     | 88  | n.i. |
|                                                              |      |              |     |                                                                                                              | Aripiprazole 20-30mg        | oral  | daily         | n.i. (20-30)     | 88  | n.i. |
| Nishikawa et al 1982(20)#                                    | 1982 | double blind | 156 | Fully <u>remitted</u> schizophrenic outpatients who were working in society                                  | Haloperidol                 | oral  | daily         | 3 (3-3)          | 10  | 33   |
|                                                              |      |              |     |                                                                                                              | Placebo                     | oral  | -             | -                | 10  | 33.6 |
| Nishikawa et al 1984(21)#                                    | 1984 | double blind | 52  | Symptom free outpatients Schizophrenia (DSM-III) in the recovery stage of <u>remission</u> or residual phase | Haloperidol 1mg             | oral  | daily         | 1 (1-1)          | 13  | 40   |
|                                                              |      |              |     |                                                                                                              | Haloperidol 3mg             | oral  | daily         | 3 (3-3)          | 12  | 36.3 |
|                                                              |      |              |     |                                                                                                              | Haloperidol 6mg             | oral  | daily         | 6 (6-6)          | 12  | 42.8 |
|                                                              |      |              |     |                                                                                                              | Placebo                     | oral  | -             | -                | 13  | 38.8 |
|                                                              | 2016 |              | 28  | Schizophrenia                                                                                                | Lurasidone                  | oral  | daily         | 78.9 (40-80)     | 144 | 43   |



|                            |      |                 |     |                                                                                                   |                           |       |                  |                       |     |      |
|----------------------------|------|-----------------|-----|---------------------------------------------------------------------------------------------------|---------------------------|-------|------------------|-----------------------|-----|------|
| Tandon et al<br>2016(22)   |      | double<br>blind |     | (DSM-IV-TR)                                                                                       | Placebo                   | oral  | -                | -                     | 141 | 42.4 |
| Pigott et al<br>2003(23)   | 2003 | double<br>blind | 26  | Schizophrenia<br>(DSM-IV)                                                                         | Aripiprazole              | oral  | daily            | 15 (15-15)            | 155 | 42.2 |
|                            |      |                 |     |                                                                                                   | Placebo                   | oral  | -                | -                     | 155 | 41.7 |
| Schooler et al<br>1997(24) | 1997 | double<br>blind | 104 | Schizophrenia (any<br>subtype), schizoaffective<br>disorder or<br>schizophreniform<br>(DSM-III-R) | Fluphenazine<br>12.5-50mg | depot | every 2<br>weeks | 27.47353<br>(12.5-50) | 55  | 29.6 |
|                            |      |                 |     |                                                                                                   | Fluphenazine 2.5-<br>10mg | depot | every 2<br>weeks | 13.775 (2.5-<br>10)   | 52  | 29.6 |
|                            |      |                 |     |                                                                                                   | Placebo                   | depot | -                | -                     | 49  | 29.6 |
| Simpson et al<br>2006(25)  | 2006 | double<br>blind | 52  | Schizophrenia or<br>schizoaffective disorder<br>(DSM-IV)                                          | Risperidone 25mg          | depot | every 2<br>weeks | 25 (25-25)            | 163 | 41.7 |
|                            |      |                 |     |                                                                                                   | Risperidone 50mg          | depot | every 2<br>weeks | 50 (50-50)            | 161 | 40.2 |

n.i. = not indicated, DSM = Diagnostic and Statistical Manual, RDC = Research diagnostic criteria , # studies in remitted patients.

**eTable2: Characteristics of Excluded Studies**

| <b>Author</b>                              | <b>Reason for exclusion</b>                                                                                                                 |
|--------------------------------------------|---------------------------------------------------------------------------------------------------------------------------------------------|
| Agid et al 2007(26)                        | Method: short-term                                                                                                                          |
| Agid et al 2008(27)                        | Method: short-term                                                                                                                          |
| Anderson et al 1976(28)                    | Method: short-term                                                                                                                          |
| Andrews et al 1976(29) <sup>i</sup>        | Method: randomized<br>Participants: schizophrenia<br>Intervention: flexible dose ranges                                                     |
| Anonymus 1994(30)                          | Method: short-term                                                                                                                          |
| Anonymus 2001(31)                          | Method: short-term                                                                                                                          |
| Aravagiri et al 1994(32)                   | Method: randomized<br>Participants: schizophrenia<br>Intervention: fixed dose<br>Outcome: not relapse prevention                            |
| Arvanitis et al 1997(33)                   | Method: short-term                                                                                                                          |
| Assion et al 2008(34)                      | Method: short-term                                                                                                                          |
| Auby et al 2002(35)                        | Method: short-term                                                                                                                          |
| Bark et al 1996(36)                        | Method: short-term                                                                                                                          |
| Barnas et al 2001(37)                      | Method: short-term                                                                                                                          |
| Bateman et al 1979(38)                     | Method: short-term                                                                                                                          |
| Beasley et al 1996 (Study F1D-MC-HGAP)(39) | Method: randomized<br>Participants: schizophrenia<br>Intervention: no fixed doses                                                           |
| Beasley et al 2003(40)                     | Method: randomized<br>Participants: schizophrenia<br>Intervention: flexible dose range                                                      |
| Berger et al 2008(41)                      | Method: short-term                                                                                                                          |
| Berwaerts et al 2015(42)                   | Method: randomized<br>Participants: schizophrenia<br>Intervention: not all participants received the same dosages of paliperidone palmitate |
| Bitter et al 1989(43)                      | Method: short-term                                                                                                                          |
| Bjorndal et al 1980(44)                    | Method: short-term                                                                                                                          |
| Boyer et al 1987(45)                       | Method: short-term                                                                                                                          |
| Brambilla et al 1987(46)                   | Method: randomized<br>Participants: chronic schizophrenia<br>Intervention: combination of drugs                                             |
| Bristol-Myers 2004/CN138114(47)            | Method: short-term                                                                                                                          |
| Bristol-Myers 2005/CN138050(48)            | Method: short-term                                                                                                                          |
| Bunney et al 2010(49)                      | Method: short-term                                                                                                                          |
| Cada et al 2004(50)                        | Method: short-term                                                                                                                          |
| Canuso et al 2010(51)                      | Method: short-term                                                                                                                          |
| Cetin et al 1999(52)                       | Method: short-term                                                                                                                          |
| Chang et al 1991(53)                       | Method: short-term                                                                                                                          |
| Channabasavanna et al 1987(54)             | Method: short-term                                                                                                                          |
| Chapel et al 2009(55)                      | Method: short-term                                                                                                                          |
| Chavda et al 2004(56)                      | Method: short-term                                                                                                                          |
| Citome et al 2019(57)                      | Method: short-term                                                                                                                          |
| Clark et al 1975(58)                       | Method: randomized<br>Participants: chronic schizophrenia<br>Intervention: flexible dosage                                                  |
| Clerc et al 1989(59)                       | Method: short-term                                                                                                                          |
| Coppola et al 2011(60)                     | Method: short-term                                                                                                                          |

|                              |                                                                                                              |
|------------------------------|--------------------------------------------------------------------------------------------------------------|
| Correll et al 2015(61)       | Method: short-term                                                                                           |
| Correll et al 2020(62)       | Method: short-term                                                                                           |
| Ctri-2014-04-004521(63)      | Method: short-term                                                                                           |
| Cutler et al 2006(64)        | Method: short-term                                                                                           |
| Cutler et al 2010(65)        | Method: short-term                                                                                           |
| Czobor et al 1993(66)        | Method: short-term                                                                                           |
| Daniel et al 1999(67)        | Method: short-term                                                                                           |
| Daniel et al 2001(68)        | Method: short-term                                                                                           |
| Daniel et al 2001a(69)       | Method: short-term                                                                                           |
| Davidson et al 2007(70)      | Method: short-term                                                                                           |
| Davis et al 1985(71)         | Method: short-term                                                                                           |
| De Buck et al 1973(72)       | Method: short-term                                                                                           |
| DelBello et al 2008(73)      | Method: short-term                                                                                           |
| Dencker et al 1978(74)       | Method: short-term, cross over design, 4 wks each                                                            |
| Denijs et al 1973(75)        | Method: randomized<br>Population: stable schizophrenics<br>Intervention: no fixed dosage                     |
| do Carmo Borges 2012(76)     | Method: short-term                                                                                           |
| Donlon et al 1978(77)        | Method: short-term                                                                                           |
| Donlon et al 1980(78)        | Method: short-term                                                                                           |
| Dubitsky et al 2002(79)      | Method: randomized<br>Population: stable schizophrenia<br>Intervention: no fixed dose                        |
| Dubovsky et al 2012(80)      | Method: short-term                                                                                           |
| Durgam et al 2014(81)        | Method: short-term                                                                                           |
| Durgam et al 2015(82)        | Method: short-term                                                                                           |
| Durgam et al 2016(83)        | Method: short-term                                                                                           |
| Durgam et al 2016a(84)       | Method: randomized<br>Population: stable schizophrenia<br>Intervention: no fixed dose                        |
| Dutoit et al 1995(85)        | Method: short-term                                                                                           |
| Eerdekenes et al 2004(86)    | Method: short-term                                                                                           |
| Eli Lilly 2008(87)           | Method: not adequately randomized                                                                            |
| EMA 2007(88)                 | Method: pooled data                                                                                          |
| Euctr2006-006434-17(89)      | Method: short-term                                                                                           |
| Findling et al 2008(90)      | Method: short-term                                                                                           |
| Findling et al 2015(91)      | Method: short-term                                                                                           |
| Findling et al 2015a(92)     | Method: short-term                                                                                           |
| Fleischhacker et al 2003(93) | Method: randomization issues                                                                                 |
| Fleischhacker et al 2017(94) | Method: randomized<br>Population: stable schizophrenia<br>Intervention: no fixed dose                        |
| Freeman et al 1962(95)       | Method: randomized<br>Population: stable schizophrenia<br>Intervention: flexible doses                       |
| Fu et al 2015(96)            | Method: randomized<br>Population: schizoaffective disorder<br>Intervention: flexible doses                   |
| Gallant et al 1974(97)       | Method: randomized<br>Population: severely ill schizophrenics<br>Intervention: flexible doses of penfluridol |
| Gitlin et al 1988(98)        | Method: short-term cross over phases                                                                         |
| Gitlin et al 2001(99)        | Method: short-term cross over phases                                                                         |

|                             |                                                                                                                                           |
|-----------------------------|-------------------------------------------------------------------------------------------------------------------------------------------|
| Goff et al 2013(100)        | Method: short-term                                                                                                                        |
| Goldman et al 2017(101)     | Method: short-term                                                                                                                        |
| Good et al 1958(102)        | Method: short-term cross over phases                                                                                                      |
| Gopal et al 2009(103)       | Method: short-term                                                                                                                        |
| Grosset al 1974(104)        | Method: randomized<br>Population: chronic schizophrenia<br>Intervention: wrong medication (pimozide, trifluoperazine)                     |
| Gutierrez et al 1996(105)   | Method: short-term                                                                                                                        |
| H. Lundbeck 2009(106)       | Method: short-term                                                                                                                        |
| Haas et al 2009(107)        | Method: short-term                                                                                                                        |
| Hale et al 2012(108)        | Method: short-term                                                                                                                        |
| Hard et al 2017(109)        | Method: randomized<br>Population: schizophrenia<br>Intervention: All groups received the same dosage over time but in different divisions |
| Hard et al 2018(110)        | Method: short-term                                                                                                                        |
| Harvey et al 2009(111)      | Method: Randomized<br>Population: schizophrenia<br>Intervention: no fixed dose                                                            |
| Harvey et al 2010(112)      | Method: randomized<br>Population: schizophrenia<br>Intervention: no fixed dose in continuation phase                                      |
| Hershon et al 1972(113)     | Method: randomized<br>Population: schizophrenia<br>Intervention: wrong medication (trifluoperazine)                                       |
| Higuchi et al 2019(114)     | Method: short-term                                                                                                                        |
| Higuchi et al 2019a(115)    | Method: short-term                                                                                                                        |
| Hirsch et al 1973(116)      | Method: randomized<br>Population: chronic schizophrenia<br>Intervention: no fixed dosage                                                  |
| Hirsch et al 1989(117)      | Method: randomized<br>Population: chronic schizophrenia<br>Intervention: no fixed dosage                                                  |
| Hirsch et al 1996(118)      | Method: randomization issues                                                                                                              |
| Hirschowitz et al 1997(119) | Method: short-term                                                                                                                        |
| Hogarty et al 1974(120)     | Method: randomized<br>Population: schizophrenia<br>Intervention: flexible doses                                                           |
| Hogarty et al 1988(121)     | Method: randomized<br>Population: schizophrenia<br>Intervention: no fixed dosages                                                         |
| Hogarty et al 1995(122)     | Method: short-term                                                                                                                        |
| Horner et al 2012(123)      | Method: short-term                                                                                                                        |
| Hough et al 2010(124)       | Method: randomized<br>Population: schizophrenia<br>Intervention: flexible doses                                                           |
| Hough et al 2011(125)       | Method: short-term                                                                                                                        |
| Huber et al 1971(126)       | Method: randomized<br>Population: schizophrenia<br>Intervention: no fixed dosages                                                         |
| Inderbitzin et al 1994(127) | Method: randomized<br>Population: schizophrenia                                                                                           |

|                                   |                                                                                                      |
|-----------------------------------|------------------------------------------------------------------------------------------------------|
|                                   | Intervention: no fixed doses                                                                         |
| Ishigooka et al 2018(128)         | Method: short-term                                                                                   |
| Ittil et al 1970(129)             | Method: short-term                                                                                   |
| Ittil et al 1971(130)             | Method: short-term                                                                                   |
| Jhee 2003(131)                    | Method: short-term                                                                                   |
| Johns 1990(132)                   | Other: no study, pooled data                                                                         |
| JPRN-JapicCTI-050092(133)         | Method: short-term                                                                                   |
| JPRN-JapicCTI-101146(134)         | Method: short-term                                                                                   |
| Kahn et al 2007(135)              | Method: short-term                                                                                   |
| Kane 1993(136)                    | Method: Short term                                                                                   |
| Kane et al 2002a(137)             | Method: short-term                                                                                   |
| Kane et al 2003(138)              | Method: short-term                                                                                   |
| Kane et al 2007(139)              | Method: short-term                                                                                   |
| Kane et al 2010a(140)             | Method: short-term                                                                                   |
| Kane et al 2011(141)              | Method: randomized<br>Population: schizophrenia<br>Intervention: flexible                            |
| Kane et al 2015(142)              | Method: short-term                                                                                   |
| Kane et al 2015a(143)             | Method: short-term                                                                                   |
| Kapur et al 1998(144)             | Method: short-term                                                                                   |
| Kapur et al 2000(145)             | Method: short-term                                                                                   |
| Kapur et al 2000a(146)            | Method: short-term                                                                                   |
| Karpouzian-Rogers et al 2020(147) | Method: randomized<br>Population: schizophrenia<br>Intervention: flexibly dosed                      |
| Kato et al 2012(148)              | Method: randomized<br>Population: Schizophrenia<br>Intervention: flexible dosages in extension phase |
| Keck et al 2001(149)              | Method: short-term                                                                                   |
| Keskiner et al 1968(150)          | Method: randomized<br>Population: schizophrenia<br>Intervention: flexible                            |
| Khanna et al 1997(151)            | Method: randomized<br>Population: acutely ill                                                        |
| King et al 1979(152)              | Method: short-term                                                                                   |
| King et al 1998(153)              | Method: short-term                                                                                   |
| Kinon et al 1993(154)             | Method: short-term                                                                                   |
| Kinon et al 2001(155)             | Other: only pooled data available                                                                    |
| Kinon et al 2004(156)             | Method: randomized<br>Population: schizophrenia<br>Intervention: no fixed dosage                     |
| Kinon et al 2008(157)             | Method: short-term                                                                                   |
| Kinon et al 2010(158)             | Method: short-term                                                                                   |
| Kinoshita et al 2016(159)         | Method: short-term                                                                                   |
| Klieser et al 1987(160)           | Method: short-term                                                                                   |
| Klieser et al 1996(161)           | Method: short-term                                                                                   |
| Ko et al 1995(162)                | Method: short-term                                                                                   |
| Kramer et al 2007(163)            | Method: short-term                                                                                   |
| Kryzhanovskaya et al 2009(164)    | Method: short-term                                                                                   |
| Kudo et al 1985(165)              | Method: unclear<br>Population: schizophrenia<br>Intervention: flexible                               |
| Kurland et al 1975(166)           | Method: short-term                                                                                   |
| Laffont et al 2015(167)           | Method: short-term                                                                                   |

|                             |                                                                                                                                      |
|-----------------------------|--------------------------------------------------------------------------------------------------------------------------------------|
| Lan et al 2007(168)         | Method: short-term                                                                                                                   |
| Landbloom et al 2017(169)   | Method: short-term                                                                                                                   |
| Lane et al 2001(170)        | Method: short-term                                                                                                                   |
| Lecrubier et al 1988(171)   | Method: short-term                                                                                                                   |
| Lecrubier et al 2006(172)   | Method: short-term                                                                                                                   |
| Lee et al 2002(173)         | Method: short-term                                                                                                                   |
| Lee et al 2012(174)         | Method: short-term                                                                                                                   |
| Lehmann et al 1980(175)     | Method: short-term                                                                                                                   |
| Lesem et al 2001(176)       | Method: short-term                                                                                                                   |
| Levin et al 1996(177)       | Method: short-term                                                                                                                   |
| Levinson et al 1992(178)    | Method: short-term                                                                                                                   |
| Levy et al 1983(179)        | Method: short-term                                                                                                                   |
| Li et al 2014(180)          | Method: short term                                                                                                                   |
| Li et al 2014a(181)         | Method: short-term                                                                                                                   |
| Liebermann et al 2016(182)  | Method: short-term                                                                                                                   |
| Lindenmayer et al 2009(183) | Method: short-term                                                                                                                   |
| Lindenmayer et al 2011(184) | Method: randomized<br>Population: chronic schizophrenia<br>Intervention Galantamine augmentation                                     |
| Llaudo et al 2016(185)      | Method: short-term                                                                                                                   |
| Loebel et al 2013(186)      | Method: short-term                                                                                                                   |
| Loebel et al 2015(187)      | Method: short-term                                                                                                                   |
| Louza Neto et al 1988(188)  | Method: short-term                                                                                                                   |
| Mahal et al 1975(189)       | Method: short-term                                                                                                                   |
| Mamo et al 2004(190)        | Method: short-term                                                                                                                   |
| Mamo et al 2007(191)        | Method: short-term                                                                                                                   |
| Marder et al 1994(192)      | Method: randomized<br>Participants: schizophrenia<br>Intervention: flexibly dosed                                                    |
| Marder et al 2007(193)      | Method: short-term                                                                                                                   |
| Marinkovic et al 2006(194)  | Method: short-term                                                                                                                   |
| Martin et al 2019(195)      | Method: short-term                                                                                                                   |
| Mathur et al 1981(196)      | Method: randomized<br>Population: chronic schizophrenia<br>Intervention: probably flexible doses, unclear<br>Outcome: no usable data |
| Matsumoto et al 2018(197)   | Method: randomized<br>Population: schizophrenia<br>Intervention: flexible dosed                                                      |
| Mauri et al 2006(198)       | Method: short-term                                                                                                                   |
| Mavroidis et al 1983(199)   | Method: short-term                                                                                                                   |
| Mavroidis et al 1984(200)   | Method: short-term                                                                                                                   |
| McClelland et al 1974(201)  | Method: randomized<br>Population: treatment resistant = not stable                                                                   |
| McDonnell et al 2008(202)   | Method: short-term                                                                                                                   |
| McEvoy et al 1991(203)      | Method: short-term                                                                                                                   |
| McEvoy et al 1996(204)      | Method: short-term                                                                                                                   |
| McGorry et al 2011(205)     | Method: short-term                                                                                                                   |
| Meltzer et al 2011(206)     | Method: short-term                                                                                                                   |
| Meltzer et al 2012(207)     | Method: short-term                                                                                                                   |
| Meltzer et al 2014(208)     | Method: randomized<br>Population: treatment resistant = not stable                                                                   |
| Meltzer et al 2015(209)     | Method: randomized<br>Population: schizophrenics                                                                                     |

|                                                     |                                                                                                     |
|-----------------------------------------------------|-----------------------------------------------------------------------------------------------------|
|                                                     | Intervention: no monotherapy                                                                        |
| Meltzer et al 2015a(210)                            | Method: short-term                                                                                  |
| Merlo et al 2002(211)                               | Method: short-term                                                                                  |
| Miceli et al 1998(212)                              | Method: short-term                                                                                  |
| Mitchell et al 2003(213)                            | Method: short-term                                                                                  |
| Mitchell et al 2006(214)                            | Method: short-term                                                                                  |
| Modestin et al 1983(215)                            | Method: short-term                                                                                  |
| Mosholder et al: Study 0008(216)                    | Method: short-term                                                                                  |
| Mosholder et al: Study 0012(216)                    | Method: short-term                                                                                  |
| Mosholder et al: Study 0013(216)                    | Method: short-term                                                                                  |
| Nair et al 1998(217)                                | Method: randomized<br>Population: treatment refractory =not stable                                  |
| Nakamura et al 2016(218)                            | Method: short-term                                                                                  |
| Nasrallah et al 2010(219)                           | Method: short-term                                                                                  |
| Nasrallah et al 2013(220)                           | Method: short-term                                                                                  |
| Nasser et al 2016(221)                              | Method: short-term                                                                                  |
| NCT 00044044(222)                                   | Method: short-term                                                                                  |
| NCT 00650611(223)                                   | Method: short-term                                                                                  |
| NCT00044005(224)                                    | Other: no usable data                                                                               |
| NCT00074477(225)                                    | Other: no usable data                                                                               |
| NCT00077714<br>Published in Meltzer et al 2008(226) | Method: short-term                                                                                  |
| NCT00078039<br>Published in Meltzer et al 2008(226) | Method: short-term                                                                                  |
| NCT00083668<br>Published in Meltzer et al 2008(226) | Method: short-term                                                                                  |
| NCT00085748(227)                                    | Other: no usable data                                                                               |
| NCT00088075(228)                                    | Method: short-term                                                                                  |
| NCT00210548(229)                                    | Method: short-term                                                                                  |
| NCT00210717(230)                                    | Method: randomized<br>Participants: schizophrenia<br>Intervention: flexibly dosed                   |
| NCT00232687(231)                                    | Method: short-term                                                                                  |
| NCT00237939(232)                                    | Method: short-term                                                                                  |
| NCT00297947(233)                                    | Method: short-term                                                                                  |
| NCT00485810(234)                                    | Method: short-term                                                                                  |
| NCT00653406(235)                                    | Method: short-term                                                                                  |
| NCT00704509(236)                                    | Method: short-term                                                                                  |
| NCT00711269(237)                                    | Method: short-term                                                                                  |
| NCT00796081(238)                                    | Method: short-term                                                                                  |
| NCT00862992(239)                                    | Method: short-term                                                                                  |
| NCT00892528(240)                                    | Method: short-term                                                                                  |
| NCT00905307(241)                                    | Method: short-term                                                                                  |
| NCT01082250(242)                                    | Method: short-term                                                                                  |
| NCT01142596(243)                                    | Other: no usable data                                                                               |
| NCT01377233(244)                                    | Method: short-term                                                                                  |
| NCT01423916(245)                                    | Method: short-term                                                                                  |
| NCT01493726(246)                                    | Other: No usable data                                                                               |
| NCT01606254(247)                                    | Method: short-term                                                                                  |
| NCT01625000(248)                                    | Method: short-term                                                                                  |
| NCT01625897(249)                                    | Method: randomized<br>Population: schizophrenia<br>Intervention: after 4 first weeks flexibly dosed |
| NCT01626456(250)                                    | Method: randomized                                                                                  |

|                             |                                                                                                                           |
|-----------------------------|---------------------------------------------------------------------------------------------------------------------------|
| (Meltzer 2015_ Ex)          | Participants: not stable                                                                                                  |
| NCT01626859(251)            | Method: short-term                                                                                                        |
| NCT01626872(252)            | Method: randomized<br>Population: schizophrenia, but unclear how stable the participants were<br>Outcome: no useable data |
| NCT01942382(253)            | Method: short-term                                                                                                        |
| NCT02146547(254)            | Method: randomized<br>Population: schizophrenia<br>Intervention: no fixed doses                                           |
| NCT02174510(255)            | Method: short-term                                                                                                        |
| NCT03751488(256)            | Method: short-term                                                                                                        |
| NCT03817502(257)            | Method: short-term                                                                                                        |
| NCT03870880(258)            | Method: randomized<br>Population: probably not stable but (still) acutely ill                                             |
| NCT03872596(259)            | Method: short-term                                                                                                        |
| NCT04030143(260)            | Method: randomized<br>Population: not 80% schizophrenia, also bipolar I                                                   |
| Neborsky et al 1981(261)    | Method: short-term                                                                                                        |
| Odejide et al 1982(262)     | Method: randomized<br>Population: acute schizophrenia                                                                     |
| Ogasa et al 2013(263)       | Method: short-term                                                                                                        |
| Ono et al 2006(264)         | Method: short-term                                                                                                        |
| Ono et al 2008(265)         | Method: short-term                                                                                                        |
| Oostuizen et al 2004(266)   | Method: short-term                                                                                                        |
| Oren et al 2007(267)        | Method: short-term                                                                                                        |
| Ortega-Soto et al 1994(268) | Method: short-term                                                                                                        |
| Ota et al 1973(269)         | Method: short-term                                                                                                        |
| Palao et al 1994(270)       | Method: short-term                                                                                                        |
| Pandina et al 2010(271)     | Method: short-term                                                                                                        |
| Petrie et al 1997(272)      | Method: short-term                                                                                                        |
| Peuskens et al 2007(273)    | Method: randomized<br>Population: chronic schizophrenia<br>Intervention: flexible doses                                   |
| Potkin et al 1985(274)      | Method: short-term                                                                                                        |
| Potkin et al 1994(275)      | Method: short-term                                                                                                        |
| Potkin et al 2003(276)      | Method: short-term                                                                                                        |
| Potkin et al 2008(277)      | Method: short-term                                                                                                        |
| Potkin et al 2013(278)      | Method: short-term                                                                                                        |
| Potkin et al 2014(279)      | Method: short-term                                                                                                        |
| Prien et al 1968(280)       | Method: short-term                                                                                                        |
| Prien et al 1969(281)       | Method: randomized<br>Population: chronic schizophrenia<br>Intervention: wrong medication                                 |
| Puech et al 1998(282)       | Method: short-term                                                                                                        |
| Quitkin et al 1975(283)     | Method: Short term<br>Population: treatment resistant = not stable                                                        |
| Ravenstijn et al 2016(284)  | Method: randomized<br>Population: schizophrenia<br>Intervention: single dose design                                       |
| Rein et al 1996(285)        | Method: short-term                                                                                                        |
| Reschke et al 1974(286)     | Method: short-term                                                                                                        |
| Rifkin et al 1977(287)      | Method: randomized                                                                                                        |



|                           |                                                                                                                                                        |
|---------------------------|--------------------------------------------------------------------------------------------------------------------------------------------------------|
|                           | Population: chronic schizophrenia<br>Intervention: flexible doses                                                                                      |
| Rifkin et al 1991(288)    | Method: short-term                                                                                                                                     |
| Rodriguez et al 2004(289) | Method: randomized<br>Population: chronic schizophrenia or schizoaffective disorder<br>Intervention: fixed medication doses<br>Outcome: no usable data |
| Roelofs et al 1974(290)   | Method: randomized<br>Population: chronic schizophrenia<br>Intervention: wrong medication                                                              |
| Rossenu et al 2008(291)   | Method: short-term                                                                                                                                     |
| Rui et al 2014(292)       | Method: variable duration in double blind treatment phase                                                                                              |
| Ruiz et al 1975(293)      | Method: short-term                                                                                                                                     |
| Ruskin et al 1991(294)    | Method: randomized<br>Population: chronic schizophrenia<br>Intervention: no fixed doses, individual dosages                                            |
| Sampath et al 1992(295)   | Method: randomized<br>Population: chronic schizophrenia<br>Intervention: no fixed doses, individual dosages continued                                  |
| Santos et al 1989(296)    | Method: short-term                                                                                                                                     |
| Sarin et al 2004(297)     | Method: short-term                                                                                                                                     |
| Schooler et al 2000(298)  | Method: short-term                                                                                                                                     |
| Shawver et al 1959(299)   | Method: randomized<br>Population: chronic schizophrenia<br>Intervention: fixed doses<br>Outcome: no relapse prevention, no measurement of symptoms     |
| Sim et al 1989(300)       | Method: short-term                                                                                                                                     |
| Simpson et al 1967(301)   | Method: short-term                                                                                                                                     |
| Simpson et al 1999(302)   | Method: randomized<br>Population: treatment refractory = not stable                                                                                    |
| Singh et al 1990(303)     | Method: short-term                                                                                                                                     |
| Singh et al 2011(304)     | Method: short-term                                                                                                                                     |
| Smith et al 1984(305)     | Method: short-term                                                                                                                                     |
| Smith et al 1987(306)     | Method: short-term                                                                                                                                     |
| Soria et al 1994(307)     | Method, randomized<br>Population: chronic schizophrenia<br>Intervention: no fixed dose                                                                 |
| Stewart et al 2009(308)   | Method: randomized<br>Population: not 80% schizophrenia                                                                                                |
| Stone et al 1995(309)     | Method: short-term                                                                                                                                     |
| Sun et al 2018(310)       | Method: short-term                                                                                                                                     |
| Svestka et al 2003(311)   | Method: short-term                                                                                                                                     |
| Swift et al 2002(312)     | Method: short-term                                                                                                                                     |
| Takeuchi et al 2014(313)  | Method: randomized<br>Population: Schizophrenia<br>Intervention: dose reduction by half = no fixed dose                                                |
| Turncliff et al 2012(314) | Method: short-term                                                                                                                                     |
| Uzun et al 2002(315)      | Method: short-term                                                                                                                                     |
| Van Erp et al 2020(316)   | Method: short-term                                                                                                                                     |

|                                 |                                                                                                   |
|---------------------------------|---------------------------------------------------------------------------------------------------|
| Van Kammern et al 1996(317)     | Method: short-term                                                                                |
| Van Putten et al 1986(318)      | Method: short-term                                                                                |
| Van Putten et al 1990(319, 320) | Method: short-term                                                                                |
| Van Putten et al 1991(321)      | Method: short-term                                                                                |
| Vandecasteele et al 1974(322)   | Method: randomized<br>Population: schizophrenia<br>Intervention: wrong medication, no fixed doses |
| Vanover et al 2016(323)         | Method: short-term                                                                                |
| Vanover et al 2016(324)         | Method: short-term                                                                                |
| Vinar et al 1970(325)           | Method: short-term                                                                                |
| Walling et al 2018(326)         | Method: short-term                                                                                |
| Wehnert et al 1999(327)         | Method: short-term                                                                                |
| Weiden et al 2016(328)          | Method: randomized<br>Population: chronic schizophrenia<br>Intervention: flexible doses           |
| Wessels et al 1991(329)         | Method: short-term                                                                                |
| Wiles et al 1980(330)           | Method: short-term                                                                                |
| Winter et al 1984(331)          | Method: short-term                                                                                |
| Witte et al 2012(332)           | Method: short-term                                                                                |
| Yamagami et al 1990(333)        | Method: randomized<br>Population: schizophrenia<br>Intervention: no fixed doses                   |
| Younis et al 2012(334)          | Method: short-term                                                                                |
| Zimbroff et al 1997(335)        | Method: short-term                                                                                |
| Zissis et al 1982(336)          | Method: randomized<br>Population: schizophrenia<br>Intervention: no fixed doses                   |

## eReferences

In sum there were 340 studies, 26 were included and 314 were excluded. Please note that some publications reported on two studies so that there are only 336 references.

1. Arato M, O'Connor R, Meltzer HY. A 1-year, double-blind, placebo-controlled trial of ziprasidone 40, 80 and 160 mg/day in chronic schizophrenia: the Ziprasidone Extended Use in Schizophrenia (ZEUS) study. *International clinical psychopharmacology*. 2002;17(5):207-15.
2. Velligan D, Newcomer J, Pultz J, Csernansky J, Hoff A, Mahurin R, et al. Does cognitive function improve with quetiapine in comparison to haloperidol? *Schizophrenia research*. 2002;53:239-48.
3. Dellva MA, Tran P, Tollefson GD, Wentley AL, Beasley CM, Jr. Standard olanzapine versus placebo and ineffective-dose olanzapine in the maintenance treatment of schizophrenia. *Psychiatric services (Washington, DC)*. 1997;48(12):1571-7.
4. Carpenter WT, Jr., Buchanan RW, Kirkpatrick B, Lann HD, Breier AF, Summerfelt AT. Comparative effectiveness of fluphenazine decanoate injections every 2 weeks versus every 6 weeks. *Am J Psychiatry*. 1999;156(3):412-8.
5. Chen EYH, Hui CLM, Lam MML, Chiu CPY, Law CW, Chung DWS, et al. Maintenance treatment with quetiapine versus discontinuation after one year of treatment in patients with remitted first episode psychosis: randomised controlled trial. *BMJ*. 2010;341:c4024.
6. Cooper SJ, Butler A, Tweed J, Welch C, Raniwalla J. Zotepine in the prevention of recurrence: a randomised, double-blind, placebo-controlled study for chronic schizophrenia. *Psychopharmacology*. 2000;150(3):237-43.
7. Dotti A, Bersani G, Rubino IA, Eliseo C. Studio in doppio cieco della flufenazina decanoato versus placebo nella terapia ambulatoriale di mantenimento di pazienti schizofrenici cronici. *Rivista di Psichiatria*. 1979;5:374-83.
8. Eklund K, Forsman A. Minimal effective dose and relapse-double-blind trial: haloperidol decanoate vs. placebo. *Clinical neuropharmacology*. 1991;14 Suppl 2:S7-12; discussion S-5.
9. Fleischhacker WW, Sanchez R, Perry PP, Jin N, Peters-Strickland T, Johnson BR, et al. Aripiprazole once-monthly for treatment of schizophrenia: double-blind, randomised, non-inferiority study. *Br J Psychiatry*. 2014;205(2):135-44.
10. Hough D, Lindenmayer JP, Gopal S, Melkote R, Lim P, Herben V, et al. Safety and tolerability of deltoid and gluteal injections of paliperidone palmitate in schizophrenia. *Prog Neuropsychopharmacol Biol Psychiatry*. 2009;33(6):1022-31.
11. Huttunen MO, Tuhkanen H, Haavisto E, Nyholm R, Pitkanen M, Raitasuo V, et al. Low- and standard-dose depot haloperidol combined with targeted oral neuroleptics. *Psychiatric services (Washington, DC)*. 1996;47(1):83-5.
12. Kane J, Rifkin A, Quitkin F, Nayak D, Saraf K, Ramos-Lorenzi J, et al., editors. *Low Dose Fluphenazine Decanoate in Treatment of Schizophrenia*. 1979.
13. Kane JM, Rifkin A, Woerner M, Reardon G, Sarantakos S, Schiebel D, et al. Low-Dose Neuroleptic Treatment of Outpatient Schizophrenics: I. Preliminary Results for Relapse Rates. *Archives of General Psychiatry*. 1983;40(8):893-6.
14. Kane JM, Davis JM, Schooler N, Marder S, Casey D, Brauzer B, et al. A multidose study of haloperidol decanoate in the maintenance treatment of schizophrenia. *Am J Psychiatry*. 2002;159(4):554-60.
15. Kane JM, Detke HC, Naber D, Sethuraman G, Lin DY, Bergstrom RF, et al. Olanzapine long-acting injection: a 24-week, randomized, double-blind trial of maintenance treatment in patients with schizophrenia. *The American journal of psychiatry*. 2010;167(2):181-9.
16. Kane JM, Sanchez R, Perry PP, Jin N, Johnson BR, Forbes RA, et al. Aripiprazole intramuscular depot as maintenance treatment in patients with schizophrenia: a 52-week,

- multicenter, randomized, double-blind, placebo-controlled study. *J Clin Psychiatry*. 2012;73(5):617-24.
17. Mallikaarjun S, Kane JM, Bricmont P, McQuade R, Carson W, Sanchez R, et al. Pharmacokinetics, tolerability and safety of aripiprazole once-monthly in adult schizophrenia: an open-label, parallel-arm, multiple-dose study. *Schizophr Res*. 2013;150(1):281-8.
  18. Marder SR, Van Putten T, Mintz J, McKenzie J, Lebell M, Faltico G, et al. Costs and benefits of two doses of fluphenazine. *Arch Gen Psychiatry*. 1984;41(11):1025-9.
  19. McEvoy JP, Daniel DG, Carson WH, Jr., McQuade RD, Marcus RN. A randomized, double-blind, placebo-controlled, study of the efficacy and safety of aripiprazole 10, 15 or 20 mg/day for the treatment of patients with acute exacerbations of schizophrenia. *Journal of psychiatric research*. 2007;41(11):895-905.
  20. Nishikawa T, Tsuda A, Tanaka M, Koga I, Uchida Y. Prophylactic effect of neuroleptics in symptom-free schizophrenics. *Psychopharmacology (Berl)*. 1982;77(4):301-4.
  21. Nishikawa T, Tsuda A, Tanaka M, Hoaki Y, Koga I, Uchida Y. Prophylactic effect of neuroleptics in symptom-free schizophrenics: a comparative dose-response study of haloperidol and propericiazine. *Psychopharmacology (Berl)*. 1984;82(3):153-6.
  22. Tandon R, Cucchiaro J, Phillips D, Hernandez D, Mao Y, Pikalov A, et al. A double-blind, placebo-controlled, randomized withdrawal study of lurasidone for the maintenance of efficacy in patients with schizophrenia. *J Psychopharmacol*. 2016;30(1):69-77.
  23. Pigott TA, Carson WH, Saha AR, Torbeyns AF, Stock EG, Ingenito GG. Aripiprazole for the prevention of relapse in stabilized patients with chronic schizophrenia: a placebo-controlled 26-week study. *The Journal of clinical psychiatry*. 2003;64(9):1048-56.
  24. Schooler NR, Keith SJ, Severe JB, Matthews SM, Bellack AS, Glick ID, et al. Relapse and rehospitalization during maintenance treatment of schizophrenia. The effects of dose reduction and family treatment. *Arch Gen Psychiatry*. 1997;54(5):453-63.
  25. Simpson GM, Mahmoud RA, Lasser RA, Kujawa M, Bossie CA, Turkoz I, et al. A 1-year double-blind study of 2 doses of long-acting risperidone in stable patients with schizophrenia or schizoaffective disorder. *The Journal of clinical psychiatry*. 2006;67(8):1194-203.
  26. Agid O, Mamo D, Ginovart N, Vitcu I, Wilson AA, Zipursky RB, et al. Striatal vs extrastriatal dopamine D2 receptors in antipsychotic response--a double-blind PET study in schizophrenia. *Int J Neuropsychopharmacol*. 2007;32(6):1209-15.
  27. Agid O, Kapur S, Warrington L, Loebel A, Siu C. Early onset of antipsychotic response in the treatment of acutely agitated patients with psychotic disorders. *Schizophrenia research*. 2008;102(1-3):241-8.
  28. Anderson WH, Kuehne JC, Catanzano DM. Rapid treatment of acute psychosis. *The American journal of psychiatry*. 1976;133(9):1076-8.
  29. Andrews P, Hall JN, Snaith RP. A controlled trial of phenothiazine withdrawal in chronic schizophrenic patients. *The British journal of psychiatry : the journal of mental science*. 1976;128:451-5.
  30. Anonymus. Risperidone vs clozapine. *Biological Therapies in Psychiatry*. USA1994. p. 47-8.
  31. Anonymus. Ziprasidone hydrochloride approved for treatment of schizophrenia, but with major warning. *American Journal of Health-System Pharmacy*. 2001;58(9):758.
  32. Aravagiri M, Marder SR, Van Putten T, Marshall BD. Simultaneous determination of plasma haloperidol and its metabolite reduced haloperidol by liquid chromatography with electrochemical detection Plasma levels in schizophrenic patients treated with oral or intramuscular depot haloperidol. *Journal of Chromatography B: Biomedical Sciences and Applications*. 1994;656(2):373-81.
  33. Arvanitis LA, Miller BG. Multiple fixed doses of "Seroquel" (quetiapine) in patients with acute exacerbation of schizophrenia: a comparison with haloperidol and placebo. The Seroquel Trial 13 Study Group. *Biological psychiatry*. 1997;42(4):233-46.
  34. Assion HJ, Reinbold H, Lemanski S, Basilowski M, Juckel G. Amisulpride augmentation in patients with schizophrenia partially responsive or unresponsive to

- clozapine. A randomized, double-blind, placebo-controlled trial. *Pharmacopsychiatry*. 2008;41(1):24-8.
35. Auby P, Saha A, Ali M, Ingenito G, Wilber R, Bramer S. Safety and tolerability of aripiprazole at doses higher than 30 mg. *Eur Neuropsychopharmacol*. 2002;12(Supplement 3):S288.
36. Bark N, Mack R, Zobrowsky J, Morris D, Sebree T, Shook S, et al. Efficacy and safety of three doses of sertindole and haloperidol in schizophrenic patients. *Biological psychiatry*. 1996;39:597.
37. Barnas C, Quiner S, Tauscher J, Hilger E, Willeit M, Küfferle B, et al. In vivo 123I IBZM SPECT imaging of striatal dopamine 2 receptor occupancy in schizophrenic patients. *Psychopharmacology*. 2001;157(3):236-42.
38. Bateman DN, Dutta DK, McClelland HA, Rawlins MD. Metoclopramide and haloperidol in tardive dyskinesia. *The British journal of psychiatry : the journal of mental science*. 1979;135:505-8.
39. Beasley CM, Jr., Sanger T, Satterlee W, Tollefson G, Tran P, Hamilton S. Olanzapine versus placebo: results of a double-blind, fixed-dose olanzapine trial. *Psychopharmacology*. 1996;124(1-2):159-67.
40. Beasley CM, Jr., Sutton VK, Hamilton SH, Walker DJ, Dossenbach M, Taylor CC, et al. A double-blind, randomized, placebo-controlled trial of olanzapine in the prevention of psychotic relapse. *Journal of clinical psychopharmacology*. 2003;23(6):582-94.
41. Berger GE, Proffitt TM, McConchie M, Kerr M, Markulev C, Yuen HP, et al. Dosing quetiapine in drug-naive first-episode psychosis: a controlled, double-blind, randomized, single-center study investigating efficacy, tolerability, and safety of 200 mg/day vs. 400 mg/day of quetiapine fumarate in 141 patients aged 15 to 25 years. *The Journal of clinical psychiatry*. 2008;69(11):1702-14.
42. Berwaerts J, Liu Y, Gopal S, Nuamah I, Xu H, Savitz A, et al. Efficacy and Safety of the 3-Month Formulation of Paliperidone Palmitate vs Placebo for Relapse Prevention of Schizophrenia: A Randomized Clinical Trial. *JAMA psychiatry*. 2015;72(8):830-9.
43. Bitter I, Jaeger J, Agdeppa J, Volavka J. Subjective symptoms: part of the negative syndrome of schizophrenia? *Psychopharmacology bulletin*. 1989;25(2):180-4.
44. Bjørndal N, Bjerre M, Gerlach J, Kristjansen P, Magelund G, Oestrich IH, et al. High dosage haloperidol therapy in chronic schizophrenic patients: a double-blind study of clinical response, side effects, serum haloperidol, and serum prolactin. *Psychopharmacology*. 1980;67(1):17-23.
45. Boyer P, Puech AJ. Determinants for clinical activity of neuroleptic drugs: chemical substances, doses, assessment tools. *Psychiatry and Psychobiology*. 1987;2(4):296-305.
46. Brambilla F, Facchinetti F, Petraglia F, Smeraldi E, Bellodi L, Brancato V, et al. Effects of neuroleptic treatments on peripheral opioid secretion. *Neuropsychobiology*. 1987;18(2):68-73.
47. Bristol-Myers\_Squibb. Synopsis. Clinical Study Report CN138114. 2004 [updated 26.04.2004. Available from: [https://benmeg.com/archives/rxarchives.org/uploads/2/4/4/6/24466638/cn138-114\\_st\\_online.pdf](https://benmeg.com/archives/rxarchives.org/uploads/2/4/4/6/24466638/cn138-114_st_online.pdf).
48. Bristol-Myers\_Squibb. Synopsis. Clinical Study Report CN138050. 2005 [updated 16.09.2005. Available from: [https://benmeg.com/archives/rxarchives.org/aripiprazole%20\(Abilify\)/CN138-050\\_online.pdf](https://benmeg.com/archives/rxarchives.org/aripiprazole%20(Abilify)/CN138-050_online.pdf).
49. Bunney W, Keator D, Fallon J, Kesler-West ML, Predna A, Nguyen D, et al. Ziprasidone D2 Receptor Occupancy at Doses of 120 to 240 mg/day Measured with 18F-Fallypride PET Support Once-A-Day Dosing. *Int J Neuropsychopharmacol*. 2010;35(Suppl 1):S96.
50. Cada DJ, Levien T, Baker DE. Risperidone Long-Acting Injection. *Hospital Pharmacy*. 2004;39(4):353-63.
51. Canuso CM, Schooler N, Carothers J, Turkoz I, Kosik-Gonzalez C, Bossie CA, et al. Paliperidone extended-release in schizoaffective disorder: a randomized, controlled study

- comparing a flexible dose with placebo in patients treated with and without antidepressants and/or mood stabilizers. *J Clin Psychopharmacol*. 2010;30(5):487-95.
52. Çetin M, Ebrinç S, Bçargün M, Bb\_pçlu C, Can S. Determination of the optimal dose of risperidone in patients with schizophrenia. *Eur Neuropsychopharmacol*. 1999;9:254-5.
53. Chang WH, Jann MW, Hwu HG, Chen TY, Lin SK, Wang JM, et al. Ethnic comparison of haloperidol and reduced haloperidol plasma levels: Taiwan Chinese versus American non-Chinese. *Journal of the Formosan Medical Association = Taiwan yi zhi*. 1991;90(6):572-8.
54. Channabasavanna SM, Michael A. Penfluridol maintenance therapy in schizophrenia: a controlled study. *Indian J Psychiatry*. 1987;29(4):333-6.
55. Chapel S, Hutmacher MM, Haig G, Bockbrader H, de Greef R, Preskorn SH, et al. Exposure-response analysis in patients with schizophrenia to assess the effect of asenapine on QTc prolongation. *Journal of clinical pharmacology*. 2009;49(11):1297-308.
56. Chavda RK, Laxmi L, Nair BS, Gandewar K. Efficacy and tolerability of aripiprazole in patients with schizophrenia & schizoaffective disorders. *Indian J Psychiatry*. 2004;46(2):150-5.
57. Citrome L, Walling D, Zeni C, Komaroff M, Park A. Efficacy and Safety of an Asenapine Transdermal Patch (Asenapine Transdermal System, HP-3070) in the Treatment of Adults With Schizophrenia: A Phase 3, Randomized, Double-Blind, Placebo-Controlled, 6-Week Inpatient Study. *Biological psychiatry*. 2019;85:S126.
58. Clark ML, Huber WK, Hill D, Wood F, Costiloe JP. Pimozide in chronic schizophrenic outpatients. *Dis Nerv Syst*. 1975;36(3):137-41.
59. Clerc G. Double-blind study of amisulpride at different dosages in negative schizophrenic patients. *Semaine des Hôpitaux de Paris*. 1989;65(17):1079-82.
60. Coppola D, Melkote R, Lannie C, Singh J, Nuamah I, Gopal S, et al. Efficacy and Safety of Paliperidone Extended Release 1.5 mg/day-A Double-blind, Placebo- and Active-Controlled, Study in the Treatment of Patients with Schizophrenia. *Psychopharmacology bulletin*. 2011;44(2):54-72.
61. Correll CU, Skuban A, Ouyang J, Hobart M, Pfister S, McQuade RD, et al. Efficacy and Safety of Brexpiprazole for the Treatment of Acute Schizophrenia: A 6-Week Randomized, Double-Blind, Placebo-Controlled Trial. *The American journal of psychiatry*. 2015;172(9):870-80.
62. Correll CU, Davis RE, Weingart M, Saillard J, O'Gorman C, Kane JM, et al. Efficacy and Safety of Lumateperone for Treatment of Schizophrenia: A Randomized Clinical Trial. *JAMA psychiatry*. 2020;77(4):349-58.
63. Clinical\_trials\_registry\_India. CTRI/2014/04/004521 2018 [updated 30.11.2018]. Available from:  
[http://www.ctri.nic.in/Clinicaltrials/pdf\\_generate.php?trialid=8566&EncHid=&modid=&compid=%27,%278566det%27](http://www.ctri.nic.in/Clinicaltrials/pdf_generate.php?trialid=8566&EncHid=&modid=&compid=%27,%278566det%27).
64. Cutler AJ, Marcus RN, Hardy SA, O'Donnell A, Carson WH, McQuade RD. The efficacy and safety of lower doses of aripiprazole for the treatment of patients with acute exacerbation of schizophrenia. *CNS spectrums*. 2006;11(9):691-702; quiz 19.
65. Cutler AJ, Tran-Johnson T, Kalali A, Astrom M, Brecher M, Meulien D. A failed 6-week, randomized, double-blind, placebo-controlled study of once-daily extended release quetiapine fumarate in patients with acute schizophrenia: lessons learned. *Psychopharmacol Bull*. 2010;43(4):37-69.
66. Czobor R, Volavka J. Quantitative electroencephalogram examination of effects of risperidone in schizophrenic patients. *Journal of clinical psychopharmacology*. 1993;13(5):332-42.
67. Daniel DG, Zimbroff DL, Potkin SG, Reeves KR, Harrigan EP, Lakshminarayanan M. Ziprasidone 80 mg/day and 160 mg/day in the acute exacerbation of schizophrenia and schizoaffective disorder: a 6-week placebo-controlled trial. Ziprasidone Study Group. *Int J Neuropsychopharmacol*. 1999;20(5):491-505.
68. Daniel DG, Potkin SG, Reeves KR, Swift RH, Harrigan EP. Intramuscular (IM) ziprasidone 20 mg is effective in reducing acute agitation associated with psychosis: a double-blind, randomized trial. *Psychopharmacology*. 2001;155(2):128-34.

69. Daniel DG, Potkin SG, Reeves KR, Swift RH, Harrigan EP. Intramuscular (IM) ziprasidone 20 mg is effective in reducing acute agitation associated with psychosis: a double-blind, randomized trial. *Psychopharmacology*. 2001;155(2):128-34.
70. Davidson M, Emsley R, Kramer M, Ford L, Pan G, Lim P, et al. Efficacy, safety and early response of paliperidone extended-release tablets (paliperidone ER): results of a 6-week, randomized, placebo-controlled study. *Schizophr Res*. 2007;93(1-3):117-30.
71. Davis JM, Ericksen SE, Hurt S, Chang SS, Javaid JI, Dekirmenjian H, et al. Haloperidol plasma levels and clinical response: basic concepts and clinical data. *Psychopharmacology bulletin*. 1985;21(1):48-51.
72. De Buck RP, editor *Relative safety and efficacy of high and low dose administration of fluphenazine-HCL to psychotic patients*. CINP Congress 1972.
73. DelBello MP, Versavel M, Ice K, Keller D, Miceli J. Tolerability of oral ziprasidone in children and adolescents with bipolar mania, schizophrenia, or schizoaffective disorder. *Journal of child and adolescent psychopharmacology*. 2008;18(5):491-9.
74. Dencker SJ, Johansson R, Lundin L, Malm U. High doses of fluphenazine enanthate in schizophrenia: a controlled study. *Acta Psychiatrica Scandinavica*. 1978;57(5):405-14.
75. Denijs EL, Vereecken JL. Pimozide (orap, R 6238) in residual schizophrenia. A clinical evaluation with long-term double-blind follow-up. *Psychiatria, neurologia, neurochirurgia*. 1973;76(1):47-59.
76. do Carmo Borges NC, Astigarraga RB, Sverdloff CE, Galvinas PR, Borges BC, Moreno RA. Comparative bioavailability of two oral formulations of clozapine in steady state administered in schizophrenic volunteers under individualized dose regime. *Current clinical pharmacology*. 2012;7(4):241-53.
77. Donlon PT, Meadow A, Tupin JP, Wahba M. High vs standard dosage fluphenazine HCL in acute schizophrenia. *The Journal of clinical psychiatry*. 1978;39(11):800-4.
78. Donlon PT, Hopkin JT, Tupin JP, Wicks JJ, Wahba M, Meadow A. Haloperidol for acute schizophrenic patients. An evaluation of three oral regimens. *Archives of general psychiatry*. 1980;37(6):691-5.
79. Dubitsky GM, Harris R, Laughren T, Hardeman S. Abilify (aripiprazole) tablets; medical review part 3. [http://www.fda.gov/cder/foi/nda/2002/21-436\\_Abilify.htm](http://www.fda.gov/cder/foi/nda/2002/21-436_Abilify.htm): U.S. Food and Drug Administration CDER; 2002. p. 111-75.
80. Dubovsky SL, Frobose C, Phiri P, de Greef R, Panagides J. Short-term safety and pharmacokinetic profile of asenapine in older patients with psychosis. *International Journal of Geriatric Psychiatry*. 2012;27(5):472-82.
81. Durgam S, Starace A, Li D, Migliore R, Ruth A, Nemeth G, et al. An evaluation of the safety and efficacy of cariprazine in patients with acute exacerbation of schizophrenia: a phase II, randomized clinical trial. *Schizophr Res*. 2014;152(2-3):450-7.
82. Durgam S, Cutler AJ, Lu K, Migliore R, Ruth A, Laszlovszky I, et al. Cariprazine in acute exacerbation of schizophrenia: a fixed-dose, phase 3, randomized, double-blind, placebo- and active-controlled trial. *The Journal of clinical psychiatry*. 2015;76(12):e1574-82.
83. Durgam S, Litman RE, Papadakis K, Li D, Németh G, Laszlovszky I. Cariprazine in the treatment of schizophrenia: a proof-of-concept trial. *International clinical psychopharmacology*. 2016;31(2):61-8.
84. Durgam S, Earley W, Li R, Li D, Lu K, Laszlovszky I, et al. Long-term cariprazine treatment for the prevention of relapse in patients with schizophrenia: A randomized, double-blind, placebo-controlled trial. *Schizophrenia research*. 2016;176(2-3):264-71.
85. Dutoit D, Thomas P, Leroux JM, Vaiga G, Pommery J, Cottencin O, et al. [Erythrocyte ketone reductase activity, total plasma haloperidol and acute psychoses]. *L'Encephale*. 1995;21(6):417-24.
86. Eerdeken M, Van Hove I, Remmerie B, Mannaert E. Pharmacokinetics and tolerability of long-acting risperidone in schizophrenia. *Schizophrenia research*. 2004;70(1):91-100.
87. Eli Lilly. A study to assess safety, tolerability, and pharmacokinetics of single and multiple doses of an intramuscular formulation of depot olanzapine (pamoate salt) in stable schizophrenic subjects. <https://www.Clinicalstudyresults.org/2008>.

88. European\_Medical\_Agency. Abilify H-C-471; European Public Assessment Report; Scientific discussion. <https://www.emea.europa.eu/humandocs/>. 7 ed2007.
89. Janssen-Cilag\_International\_N.V. EU Clinical Trials Register Euctr2006-006434-17 2006 [Available from: [https://www.clinicaltrialsregister.eu/ctr-search/search?query=eudract\\_number:2006-006434-17](https://www.clinicaltrialsregister.eu/ctr-search/search?query=eudract_number:2006-006434-17)].
90. Findling RL, Robb A, Nyilas M, Forbes RA, Jin N, Ivanova S, et al. A multiple-center, randomized, double-blind, placebo-controlled study of oral aripiprazole for treatment of adolescents with schizophrenia. *The American journal of psychiatry*. 2008;165(11):1432-41.
91. Findling RL, Landbloom RP, Mackle M, Pallozzi W, Braat S, Hundt C, et al. Safety and Efficacy from an 8 Week Double-Blind Trial and a 26 Week Open-Label Extension of Asenapine in Adolescents with Schizophrenia. *Journal of child and adolescent psychopharmacology*. 2015;25(5):384-96.
92. Findling R, Chiu YY, Silva R, Goldman R, Jin F, Pikalov A, et al. Pharmacokinetic and Safety Evaluation of Lurasidone in Pediatric Patients with Psychiatric Disorders. *European Psychiatry*. 2015;30:1202.
93. Fleischhacker WW, Eerdeken M, Karcher K, Remington G, Llorca PM, Chrzanowski W, et al. Treatment of schizophrenia with long-acting injectable risperidone: a 12-month open-label trial of the first long-acting second-generation antipsychotic. *The Journal of clinical psychiatry*. 2003;64(10):1250-7.
94. Fleischhacker WW, Hobart M, Ouyang J, Forbes A, Pfister S, McQuade RD, et al. Efficacy and Safety of Brexpiprazole (OPC-34712) as Maintenance Treatment in Adults with Schizophrenia: a Randomized, Double-Blind, Placebo-Controlled Study. *Int J Neuropsychopharmacol*. 2017;20(1):11-21.
95. Freeman LS, Alson E. Prolonged withdrawal of chlorpromazine in chronic patients. *Diseases of the nervous system*. 1962;23:522-5.
96. Fu DJ, Turkoz I, Simonson RB, Walling DP, Schooler NR, Lindenmayer JP, et al. Paliperidone palmitate once-monthly reduces risk of relapse of psychotic, depressive, and manic symptoms and maintains functioning in a double-blind, randomized study of schizoaffective disorder. *J Clin Psychiatry*. 2015;76(3):253-62.
97. Gallant DM, Mielke DH, Spirtes MA, Swanson WC, Bost R. Penfluridol: an efficacious long-acting oral antipsychotic compound. *The American journal of psychiatry*. 1974;131(6):699-702.
98. Gitlin MJ, Midha KK, Fogelson D, Nuechterlein K. Persistence of fluphenazine in plasma after decanoate withdrawal. *Journal of clinical psychopharmacology*. 1988;8(1):53-6.
99. Gitlin M, Nuechterlein K, Subotnik KL, Ventura J, Mintz J, Fogelson DL, et al. Clinical outcome following neuroleptic discontinuation in patients with remitted recent-onset schizophrenia. *The American journal of psychiatry*. 2001;158(11):1835-42.
100. Goff DC, McEvoy JP, Citrome L, Mech AW, Bustillo JR, Gil R, et al. High-dose oral ziprasidone versus conventional dosing in schizophrenia patients with residual symptoms: the ZEBRAS study. *J Clin Psychopharmacol*. 2013;33(4):485-90.
101. Goldman R, Loebel A, Cucchiaro J, Deng L, Findling RL. Efficacy and Safety of Lurasidone in Adolescents with Schizophrenia: A 6-Week, Randomized Placebo-Controlled Study. *Journal of child and adolescent psychopharmacology*. 2017;27(6):516-25.
102. Good WW, Sterling M, Holtzman WH. Termination of chlorpromazine with schizophrenic patients. *The American journal of psychiatry*. 1958;115(5):443-8.
103. Gopal S, Hough DW, Xu H, Lull JM, Gassmann-Mayer C, Remmerie BM, et al. Efficacy and safety of paliperidone palmitate in adult patients with acutely symptomatic schizophrenia: a randomized, double-blind, placebo-controlled, dose-response study. *Int Clin Psychopharmacol*. 2010;25(5):247-56.
104. Gross HS. A double-blind comparison of once-a-day pimozide, trifluoperazine, and placebo in the maintenance care of chronic schizophrenic outpatients. *Current therapeutic research, clinical and experimental*. 1974;16(7):696-705.
105. Gutierrez R, Potkin S. Efficacy and safety of once-daily dosing with risperidone in patients with schizophrenia. 35th Annual Meeting of the American College of Neuropsychopharmacology; San Juan, Puerto Rico 1996. p. 259.



106. H.Lundbeck. Efficacy of Bifeprunox in Patients With Schizophrenia 2008 [Available from: <https://www.clinicaltrials.gov/ct2/show/NCT00658645>.
107. Haas M, Eerdekens M, Kushner S, Singer J, Augustyns I, Quiroz J, et al. Efficacy, safety and tolerability of two dosing regimens in adolescent schizophrenia: double-blind study. *The British journal of psychiatry : the journal of mental science*. 2009;194(2):158-64.
108. Hale AS, Azorin JM, Lemming OM, Mæhlum E. Sertindole in the long-term treatment of schizophrenia. *International clinical psychopharmacology*. 2012;27(4):231-7.
109. Hard ML, Mills RJ, Sadler BM, Wehr AY, Weiden PJ, von Moltke L. Pharmacokinetic Profile of a 2-Month Dose Regimen of Aripiprazole Lauroxil: A Phase I Study and a Population Pharmacokinetic Model. *CNS drugs*. 2017;31(7):617-24.
110. Hard ML, Wehr AY, Du Y, Weiden PJ, Walling D, von Moltke L. Pharmacokinetic Evaluation of a 1-Day Treatment Initiation Option for Starting Long-Acting Aripiprazole Lauroxil for Schizophrenia. *Journal of clinical psychopharmacology*. 2018;38(5):435-41.
111. Harvey PD, Pappadopulos E, Lombardo I, Kremer CM. Reduction of functional disability with atypical antipsychotic treatment: A randomized long term comparison of ziprasidone and haloperidol. *Schizophrenia research*. 2009;115(1):24-9.
112. Harvey PD, Murasaki M, Cucchiari J, Ogasa M, Loebel A. A three arm dose finding study of lurasidone: efficacy and tolerability data. *Schizophrenia research*. 2010;117(2):374-5.
113. Hershon HI, Kennedy PF, McGuire RJ. Persistence of extra-pyramidal disorders and psychiatric relapse after withdrawal of long-term phenothiazine therapy. *The British journal of psychiatry : the journal of mental science*. 1972;120(554):41-50.
114. Higuchi T, Ishigooka J, Iyo M, Yeh CB, Ebenezer EG, Liang KY, et al. Lurasidone in the treatment of schizophrenia: Results of a double-blind, placebo-controlled trial in Asian patients. *Asia-Pacific psychiatry : official journal of the Pacific Rim College of Psychiatrists*. 2019;11(2):e12352.
115. Higuchi T, Iyo M, Kwon JS, Chou YH, Chen HK, Chen JY, et al. Randomized, double-blind, placebo, and risperidone-controlled study of lurasidone in the treatment of schizophrenia: Results of an inconclusive 6-week trial. *Asia-Pacific psychiatry : official journal of the Pacific Rim College of Psychiatrists*. 2019;11(3):e12354.
116. Hirsch SR, Gajnd R, Rohde PD, Stevens BC, Wing JK. Outpatient maintenance of chronic schizophrenic patients with long-acting fluphenazine: double-blind placebo trial. Report to the Medical Research Council Committee on Clinical Trials in Psychiatry. *British medical journal*. 1973;1(5854):633-7.
117. Hirsch SR, Jolley AG. The Dysphoric Syndrome in Schizophrenia and its Implications for Relapse. *British Journal of Psychiatry*. 1989;155(S5):46-50.
118. Hirsch S, Bowen J, Emami J, Cramer P, Jolley A, Haw C, et al. A One Year Prospective Study of the Effect of Life Events and Medication in the Aetiology of Schizophrenic Relapse. *British Journal of Psychiatry*. 1996;168(1):49-56.
119. Hirschowitz J, Hitzemann R, Piscani K, Burr G, Frecska E, Culliton D, et al. The Dose Reduction in Schizophrenia (DORIS) Study: a final report. *Schizophrenia research*. 1997;23(1):31-43.
120. Hogarty GE, Goldberg SC, Schooler NR, Ulrich RF. Drug and psychotherapy in the aftercare of schizophrenic patients. II. Two-year relapse rates. *Archives of general psychiatry*. 1974;31(5):603-8.
121. Hogarty GE, McEvoy JP, Munetz M, DiBarry AL, Bartone P, Cather R, et al. Dose of fluphenazine, familial expressed emotion, and outcome in schizophrenia. Results of a two-year controlled study. *Archives of general psychiatry*. 1988;45(9):797-805.
122. Hogarty GE, McEvoy JP, Ulrich RF, DiBarry AL, Bartone P, Cooley S, et al. Pharmacotherapy of Impaired Affect in Recovering Schizophrenic Patients. *Archives of general psychiatry*. 1995;52(1):29-41.
123. Honer WG, MacEwan GW, Gendron A, Stip E, Labelle A, Williams R, et al. A randomized, double-blind, placebo-controlled study of the safety and tolerability of high-dose quetiapine in patients with persistent symptoms of schizophrenia or schizoaffective disorder. *J Clin Psychiatry*. 2012;73(1):13-20.

124. Hough D, Gopal S, Vijapurkar U, Lim P, Morozova M, Eerdeken M. Paliperidone palmitate maintenance treatment in delaying the time-to-relapse in patients with schizophrenia: a randomized, double-blind, placebo-controlled study. *Schizophrenia research*. 2010;116(2-3):107-17.
125. Hough DW, Natarajan J, Vandebosch A, Rossenu S, Kramer M, Eerdeken M. Evaluation of the effect of paliperidone extended release and quetiapine on corrected QT intervals: a randomized, double-blind, placebo-controlled study. *International clinical psychopharmacology*. 2011;26(1):25-34.
126. Huber W, Serafetinides EA, Colmore JP, Clark M. Pimozide in chronic schizophrenic patients. *The Journal of clinical pharmacology and new drugs*. 1971;11(4):304-9.
127. Inderbitzin LB, Lewine RR, Scheller-Gilkey G, Swofford CD, Egan GJ, Gloersen BA, et al. A double-blind dose-reduction trial of fluphenazine decanoate for chronic, unstable schizophrenic patients. *The American journal of psychiatry*. 1994;151(12):1753-9.
128. Ishigooka J, Iwashita S, Tadori Y. Efficacy and safety of brexpiprazole for the treatment of acute schizophrenia in Japan: A 6-week, randomized, double-blind, placebo-controlled study. *Psychiatry and clinical neurosciences*. 2018;72(9):692-700.
129. Itil T, Keskiner A, Heinemann L, Han T, Gannon P, Hsu W. Treatment of resistant schizophrenics with extreme high dosage fluphenazine hydrochloride. *Psychosomatics*. 1970;11(5):456-63.
130. Itil TM, Saletu B, Hsu W, Kiremitci N, Keskiner A. Clinical and quantitative EEG changes at different dosage levels of fluphenazine treatment. *Acta Psychiatrica Scandinavica*. 1971;47(4):440-51.
131. Jhee S, Guarino J, Ogasa M, Kimura T, Kassem R, Shiovitz T, et al. A maximum tolerated dose study of SM13496 in patients with schizophrenia. *Schizophrenia research*. 2003;60:287-.
132. Johns CA, Mayerhoff DI, Lieberman JA, Kane JM. Schizophrenia: alternative neuroleptic strategies. In: Angrist B, Schulz SC, editors. *The Neuroleptic-Nonresponsive Patient: Characterization and Treatment*. Washington, DC, USA: American Psychiatric Press Inc; 1990. p. 53-66.
133. Dainippon Sumitomo Pharma Co. L. JPRN-JapicCTI-050092 2005 [updated 12.09.2005. Available from: [https://rctportal.niph.go.jp/en/detail?trial\\_id=JapicCTI-050092](https://rctportal.niph.go.jp/en/detail?trial_id=JapicCTI-050092).
134. Otsuka Pharmaceutical Co. L. A short treatment study of aripiprazole in pediatric patients with schizophrenia 2017 [updated 06.01.2017. Available from: <https://www.clinicaltrials.jp/cti-user/trial/ShowDirect.jsp?japicid=JapicCTI-101146>.
135. Kahn RS, Schulz SC, Palazov VD, Reyes EB, Brecher M, Svensson O, et al. Efficacy and tolerability of once-daily extended release quetiapine fumarate in acute schizophrenia: a randomized, double-blind, placebo-controlled study. *The Journal of clinical psychiatry*. 2007;68(6):832-42.
136. Kane JM, Kinon B, Johns C. Alternative strategies for treating neuroleptic non responsive patients. *Schizophrenia Research*. 1993;9:240.
137. Kane JM, Carson WH, Saha AR, McQuade RD, Ingenito GG, Zimbroff DL, et al. Efficacy and safety of aripiprazole and haloperidol versus placebo in patients with schizophrenia and schizoaffective disorder. *The Journal of clinical psychiatry*. 2002;63(9):763-71.
138. Kane JM, Eerdeken M, Lindenmayer JP, Keith SJ, Lesem M, Karcher K. Long-acting injectable risperidone: efficacy and safety of the first long-acting atypical antipsychotic. *Am J Psychiatry*. 2003;160(6):1125-32.
139. Kane J, Canas F, Kramer M, Ford L, Gassmann-Mayer C, Lim P, et al. Treatment of schizophrenia with paliperidone extended-release tablets: a 6-week placebo-controlled trial. *Schizophrenia research*. 2007;90(1-3):147-61.
140. Kane JM, Cohen M, Zhao J, Alphs L, Panagides J. Efficacy and safety of asenapine in a placebo- and haloperidol-controlled trial in patients with acute exacerbation of schizophrenia. *Journal of clinical psychopharmacology*. 2010;30(2):106-15.

141. Kane JM, Mackle M, Snow-Adami L, Zhao J, Szegedi A, Panagides J. A randomized placebo-controlled trial of asenapine for the prevention of relapse of schizophrenia after long-term treatment. *The Journal of clinical psychiatry*. 2011;72(3):349-55.
142. Kane JM, Zukin S, Wang Y, Lu K, Ruth A, Nagy K, et al. Efficacy and Safety of Cariprazine in Acute Exacerbation of Schizophrenia: Results From an International, Phase III Clinical Trial. *Journal of clinical psychopharmacology*. 2015;35(4):367-73.
143. Kane JM, Skuban A, Ouyang J, Hobart M, Pfister S, McQuade RD, et al. A multicenter, randomized, double-blind, controlled phase 3 trial of fixed-dose brexpiprazole for the treatment of adults with acute schizophrenia. *Schizophrenia research*. 2015;164(1-3):127-35.
144. Kapur S, Zipursky RB, Remington G, Jones C, DaSilva J, Wilson AA, et al. 5-HT<sub>2</sub> and D<sub>2</sub> receptor occupancy of olanzapine in schizophrenia: a PET investigation. *The American journal of psychiatry*. 1998;155(7):921-8.
145. Kapur S, Zipursky R, Jones C, Shammi CS, Remington G, Seeman P. A positron emission tomography study of quetiapine in schizophrenia: a preliminary finding of an antipsychotic effect with only transiently high dopamine D<sub>2</sub> receptor occupancy. *Archives of general psychiatry*. 2000;57(6):553-9.
146. Kapur S, Zipursky R, Jones C, Remington G, Houle S. Relationship between dopamine D<sub>2</sub> occupancy, clinical response, and side effects: a double-blind PET study of first-episode schizophrenia. *Am J Psychiatry*. 2000;157(4):514-20.
147. Karpouzian-Rogers T, Stocks J, Meltzer HY, Reilly JL. The effect of high vs. low dose lurasidone on eye movement biomarkers of prefrontal abilities in treatment-resistant schizophrenia. *Schizophrenia research*. 2020;215:314-21.
148. Kato M, Ogasa M, Ogo H, Ishige Y, Sawabe H, Siu C, et al. Long-term treatment with lurasidone in schizophrenia: Results of an 8-week double-blind acute study followed by a 44-week open-label extension. *Schizophrenia research*. 2012;136(Supplement 1):351.
149. Keck PE, Jr., Reeves KR, Harrigan EP. Ziprasidone in the short-term treatment of patients with schizoaffective disorder: results from two double-blind, placebo-controlled, multicenter studies. *Journal of clinical psychopharmacology*. 2001;21(1):27-35.
150. Keskiner A, Holden JM, Itil TM. Maintenance treatment of schizophrenic outpatients with a depot phenothiazine. *Psychosomatics*. 1968;9(3):166-71.
151. Khanna A, Lal N, Dalal PK, Khalid A, Trivedi JK. Treatment of acute and transient psychotic disorders with low and high doses of oral haloperidol. *Indian J Psychiatry*. 1997;39(2):136-42.
152. King CE, Goldstein MJ. Therapist Ratings of Achievement of Objectives in Psychotherapy With Acute Schizophrenics\*. *Schizophrenia bulletin*. 1979;5(1):118-29.
153. King DJ, Link CGG, Kowalczyk B. A comparison of bd and tid dose regimens of quetiapine (Seroquel) in the treatment of schizophrenia. *Psychopharmacology*. 1998;137(2):139-46.
154. Kinon BJ, Kane JM, Johns C, Perovich R, Ismi M, Koreen A, et al. Treatment of neuroleptic-resistant schizophrenic relapse. *Psychopharmacology bulletin*. 1993;29(2):309-14.
155. Kinon BJ, Wang L, Gilmore JA. Exploration of a dose-response relationship in schizophrenia with the novel antipsychotic drug olanzapine. *Eur Neuropsychopharmacol*. 2001;11(3):277.
156. Kinon BJ, Jeste DV, Kollack-Walker S, Stauffer V, Liu-Seifert H. Olanzapine treatment for tardive dyskinesia in schizophrenia patients: a prospective clinical trial with patients randomized to blinded dose reduction periods. *Progress in neuro-psychopharmacology & biological psychiatry*. 2004;28(6):985-96.
157. Kinon BJ, Volavka J, Stauffer V, Edwards SE, Liu-Seifert H, Chen L, et al. Standard and higher dose of olanzapine in patients with schizophrenia or schizoaffective disorder: a randomized, double-blind, fixed-dose study. *J Clin Psychopharmacol*. 2008;28(4):392-400.
158. Kinon BJ, Chen L, Ascher-Svanum H, Stauffer VL, Kollack-Walker S, Zhou W, et al. Early Response to Antipsychotic Drug Therapy as a Clinical Marker of Subsequent

- Response in the Treatment of Schizophrenia. *Int J Neuropsychopharmacol*. 2010;35(2):581-90.
159. Kinoshita T, Bai Y-M, Kim J-H, Miyake M, Oshima N. Efficacy and safety of asenapine in Asian patients with an acute exacerbation of schizophrenia: a multicentre, randomized, double-blind, 6-week, placebo-controlled study. *Psychopharmacology*. 2016;233(14):2663-74.
160. Klieser E, Lehmann E. Experimental comparison of the effectivity of individually adapted and standardized dosages of haloperidol. *Neuropsychobiology*. 1987;18(3):122-6.
161. Klieser E, Lehmann E, Heinrich K. Risperidone in Comparison with Various Treatments of Schizophrenia. Serotonin in Antipsychotic Treatment Mechanisms and Clinical Practice Edited by JM Kane, H-J Moller and F Awouters, Marcel Dekker Inc, New York, Basel, Hong Kong. 1996:331-43.
162. Ko G, Goff D, Herz H, Wilner K, Posever T, Howard H, et al. Status report: ziprasidone. *Schizophrenia Research*. 1995;15(1):154.
163. Kramer M, Simpson G, Maciulis V, Kushner S, Vijapurkar U, Lim P, et al. Paliperidone extended-release tablets for prevention of symptom recurrence in patients with schizophrenia: a randomized, double-blind, placebo-controlled study. *Journal of clinical psychopharmacology*. 2007;27(1):6-14.
164. Kryzhanovskaya L, Schulz SC, McDougle C, Frazier J, Dittmann R, Robertson-Plouch C, et al. Olanzapine versus placebo in adolescents with schizophrenia: a 6-week, randomized, double-blind, placebo-controlled trial. *Journal of the American Academy of Child and Adolescent Psychiatry*. 2009;48(1):60-70.
165. Kudo Y. Multi-Clinical Study of Haloperidol Decanoate on Schizophrenia. *Japanese Journal of Neuropsychopharmacology*. 1985;7:947-60.
166. Kurland AA, Ota KY, Slotnick VB. Penfluridol: a long-acting oral neuroleptic. A controlled study. *Journal of clinical pharmacology*. 1975;15(8-9):611-21.
167. Laffont CM, Gomeni R, Zheng B, Heidbreder C, Fudala PJ, Nasser AF. Population pharmacokinetic modeling and simulation to guide dose selection for RBP-7000, a new sustained-release formulation of risperidone. *Journal of clinical pharmacology*. 2015;55(1):93-103.
168. Lan T, Chiu H, Hu T, Huang H, Wu B, Tuan Y. Prolactin level as an indicator to clinical psychopathological severity in aripiprazole treated schizophrenia. *Eur Neuropsychopharmacol*. 2007;18(Supplement 4):S440.
169. Landbloom R, Mackle M, Wu X, Kelly L, Snow-Adami L, McIntyre RS, et al. Asenapine for the treatment of adults with an acute exacerbation of schizophrenia: results from a randomized, double-blind, fixed-dose, placebo-controlled trial with olanzapine as an active control. *CNS spectrums*. 2017;22(4):333-41.
170. Lane HY, Chang WH, Chiu CC, Huang MC, Lee SH, Chen JY. A pilot double-blind, dose-comparison study of risperidone in drug-naïve first-episode schizophrenia. *The Journal of clinical psychiatry*. 2001;62(12):994-5.
171. Lecrubier Y, Puech AJ, Aubin F, Boyer P, Deyrieux B. Improvement by amisulpride of the negative syndrome in non-psychotic subjects : a preliminary study. *Psychiatry and Psychobiology*. 1988;3(5):329-33.
172. Lecrubier Y, Quintin P, Bouhassira M, Perrin E, Lancrenon S. The treatment of negative symptoms and deficit states of chronic schizophrenia: olanzapine compared to amisulpride and placebo in a 6-month double-blind controlled clinical trial. *Acta Psychiatrica Scandinavica*. 2006;114(5):319-27.
173. Lee HS, Kim CH, Kim YH, Yoon DJ, Lee MS, Suh HS, et al. Effective titration of risperidone in patients with schizophrenia: open multicenter randomized comparative 8 weeks study. *Korean Journal of Psychopharmacology*. 2002;13(4):276-88.
174. Lee SJ, Lee JH, Jung SW, Koo BH, Choi TY, Lee KH. A 6-week, randomized, multicentre, open-label study comparing efficacy and tolerability of amisulpride at a starting dose of 400 mg/day versus 800 mg/day in patients with acute exacerbations of schizophrenia. *Clinical drug investigation*. 2012;32(11):735-45.

175. Lehmann E, Quadbeck H, Tegeler J, Fararuni M, Heinrich K. Drug-response differences of high and standard dosage of fluphenazine-decanoate in relation to schizophrenic symptoms. *Pharmakopsychiatrie, Neuro-Psychopharmakologie*. 1980;13(3):117-29.
176. Lesem MD, Zajecka JM, Swift RH, Reeves KR, Harrigan EP. Intramuscular ziprasidone, 2 mg versus 10 mg, in the short-term management of agitated psychotic patients. *The Journal of clinical psychiatry*. 2001;62(1):12-8.
177. Levin ED, Wilson W, Rose JE, McEvoy J. Nicotine-haloperidol interactions and cognitive performance in schizophrenics. *Int J Neuropsychopharmacol*. 1996;15(5):429-36.
178. Levinson DF, Singh H, Simpson GM. Timing of Acute Clinical Response to Fluphenazine. *British Journal of Psychiatry*. 1992;160(3):365-71.
179. Levy DL, Lipton RB, Holzman PS, Davis JM. Eye tracking dysfunction unrelated to clinical state and treatment with haloperidol. *Biological psychiatry*. 1983;18(7):813-9.
180. Li Q, Su YA, Liu Y, Chen JX, Tan YL, Yang FD, et al. Pharmacokinetics and tolerability of extended-release quetiapine fumarate in Han Chinese patients with schizophrenia. *Clinical pharmacokinetics*. 2014;53(5):455-65.
181. Li M, Heidbreder C, Fudala P, Nasser A. A model-based approach to characterize risperidone release, absorption, and disposition after administration of RBP-7000 in schizophrenic patients. *Clinical Pharmacology and Therapeutics*. 2014;95:S77.
182. Lieberman JA, Davis RE, Correll CU, Goff DC, Kane JM, Tamminga CA, et al. ITI-007 for the Treatment of Schizophrenia: A 4-Week Randomized, Double-Blind, Controlled Trial. *Biological psychiatry*. 2016;79(12):952-61.
183. Lindenmayer JP, Liu-Seifert H, Kulkarni PM, Kinon BJ, Stauffer V, Edwards SE, et al. Medication nonadherence and treatment outcome in patients with schizophrenia or schizoaffective disorder with suboptimal prior response. *The Journal of clinical psychiatry*. 2009;70(7):990-6.
184. Lindenmayer J-P, Khan A. Galantamine augmentation of long-acting injectable risperidone for cognitive impairments in chronic schizophrenia. *Schizophrenia research*. 2011;125(2):267-77.
185. Llaudó J, Anta L, Ayani I, Martínez J, Schronen J, Morozova M, et al. Phase I, open-label, randomized, parallel study to evaluate the pharmacokinetics, safety, and tolerability of one intramuscular injection of risperidone ISM at different dose strengths in patients with schizophrenia or schizoaffective disorder (PRISMA-1). *International clinical psychopharmacology*. 2016;31(6):323-31.
186. Loebel A, Cucchiari J, Sarma K, Xu L, Hsu C, Kalali AH, et al. Efficacy and safety of lurasidone 80 mg/day and 160 mg/day in the treatment of schizophrenia: a randomized, double-blind, placebo- and active-controlled trial. *Schizophr Res*. 2013;145(1-3):101-9.
187. Loebel A, Citrome L, Correll CU, Xu J, Cucchiari J, Kane JM. Treatment of early non-response in patients with schizophrenia: assessing the efficacy of antipsychotic dose escalation. *BMC psychiatry*. 2015;15:271.
188. Louza Neto MR, Müller-Spahn F, Rütger E, Scherer J. Haloperidol plasma level after a test dose as predictor for the clinical response to treatment in acute schizophrenic patients. *Pharmacopsychiatry*. 1988;21(5):226-31.
189. Mahal AS, Janakiramaiah NN. A Double-Blind Placebo Controlled Trial Of Pimozide(R6238) On 49 Hospitalized Chronic Schizophrenics. *Indian J Psychiatry*. 1975;17(1):45-55.
190. Mamo D, Kapur S, Shammi CM, Papatheodorou G, Mann S, Therrien F, et al. A PET study of dopamine D2 and serotonin 5-HT2 receptor occupancy in patients with schizophrenia treated with therapeutic doses of ziprasidone. *The American journal of psychiatry*. 2004;161(5):818-25.
191. Mamo D, Graff A, Mizrahi R, Shammi CM, Romeyer F, Kapur S. Differential effects of aripiprazole on D(2), 5-HT(2), and 5-HT(1A) receptor occupancy in patients with schizophrenia: a triple tracer PET study. *The American journal of psychiatry*. 2007;164(9):1411-7.

192. Marder SR, Meibach RC. Risperidone in the treatment of schizophrenia. *The American journal of psychiatry*. 1994;151(6):825-35.
193. Marder SR, Kramer M, Ford L, Eerdeken E, Lim P, Eerdeken M, et al. Efficacy and safety of paliperidone extended-release tablets: results of a 6-week, randomized, placebo-controlled study. *Biological psychiatry*. 2007;62(12):1363-70.
194. Marinkovic D, Totic S, Marjanovic M. Is risperidone an atypical antipsychotic? *Eur Neuropsychopharmacol*. 2006;16(Suppl 4):S424.
195. Martin WF, Correll CU, Weiden PJ, Jiang Y, Pathak S, DiPetrillo L, et al. Mitigation of Olanzapine-Induced Weight Gain With Samidorphan, an Opioid Antagonist: A Randomized Double-Blind Phase 2 Study in Patients With Schizophrenia. *The American journal of psychiatry*. 2019;176(6):457-67.
196. Mathur S, Hall JN. Phenothiazine withdrawal in schizophrenics in a hostel. *The British journal of psychiatry : the journal of mental science*. 1981;138:271-2.
197. Matsumoto H, Ishigooka J, Ono H, Tadori Y. Safety and efficacy from a 6-week double-blind study and a 52-week open-label extension of aripiprazole in adolescents with schizophrenia in Japan. *Psychiatry and clinical neurosciences*. 2018;72(9):701-12.
198. Mauri MC, Colasanti A, Rossattini M, Moliterno D, Baldi ML, Papa P. A single-blind, randomized comparison of olanzapine at a starting dose of 5 mg versus 20 mg in acute schizophrenia. *Clinical neuropharmacology*. 2006;29(3):126-31.
199. Mavroidis ML, Kanter DR, Hirschowitz J, Garver DL. Clinical response and plasma haloperidol levels in schizophrenia. *Psychopharmacology*. 1983;81(4):354-6.
200. Mavroidis ML, Kanter DR, Hirschowitz J, Garver DL. Fluphenazine plasma levels and clinical response. *J Clin Psychiatry*. 1984;45(9):370-3.
201. McClelland HA, Blessed G, Bhate S, Ali N, Clarke PA. The abrupt withdrawal of antiparkinsonian drugs in schizophrenic patients. *The British journal of psychiatry : the journal of mental science*. 1974;124(579):151-9.
202. McDonnell D, Lauriello J, Lambert T, Andersen S, Lin D, Detke H. Olanzapine long-acting injection: An 8-week double-blind, randomized, placebo-controlled study in acutely-ill patients with schizophrenia. *Schizophrenia research*. 2008;102:251.
203. McEvoy JP, Hogarty GE, Steingard S. Optimal dose of neuroleptic in acute schizophrenia. A controlled study of the neuroleptic threshold and higher haloperidol dose. *Archives of general psychiatry*. 1991;48(8):739-45.
204. McEvoy JP, Lindgren J. Smoking and schizophrenia. *Drug Development Research*. 1996;38(3-4):263-6.
205. McGorry P, Cocks J, Power P, Burnett P, Harrigan S, Lambert T. Very Low-Dose Risperidone in First-Episode Psychosis: A Safe and Effective Way to Initiate Treatment. *Schizophr Res Treatment*. 2011;2011:631690.
206. Meltzer HY, Cucchiari J, Silva R, Ogasa M, Phillips D, Xu J, et al. Lurasidone in the treatment of schizophrenia: a randomized, double-blind, placebo- and olanzapine-controlled study. *Am J Psychiatry*. 2011;168(9):957-67.
207. Meltzer HY, Elkis H, Vanover K, Weiner DM, van Kammen DP, Peters P, et al. Pimavanserin, a selective serotonin (5-HT)<sub>2A</sub>-inverse agonist, enhances the efficacy and safety of risperidone, 2mg/day, but does not enhance efficacy of haloperidol, 2mg/day: Comparison with reference dose risperidone, 6mg/day. *Schizophrenia research*. 2012;141(2):144-52.
208. Meltzer HY, Lindenmayer JP, Kwentus J, Share DB, Johnson R, Jayathilake K. A six month randomized controlled trial of long acting injectable risperidone 50 and 100mg in treatment resistant schizophrenia. *Schizophrenia research*. 2014;154(1-3):14-22.
209. Meltzer H, Share B, Jayathilake K. Lurasidone is an effective treatment for treatment resistant schizophrenia. *Int J Neuropsychopharmacol*. 2015;40:S546.
210. Meltzer HY, Risinger R, Nasrallah HA, Du Y, Zummo J, Corey L, et al. A randomized, double-blind, placebo-controlled trial of aripiprazole lauroxil in acute exacerbation of schizophrenia. *The Journal of clinical psychiatry*. 2015;76(8):1085-90.

211. Merlo MC, Hofer H, Gekle W, Berger G, Ventura J, Panhuber I, et al. Risperidone, 2 mg/day vs. 4 mg/day, in first-episode, acutely psychotic patients: treatment efficacy and effects on fine motor functioning. *The Journal of clinical psychiatry*. 2002;63(10):885-91.
212. Miceli J, Preskorn S, Wilner K, Folger C, Tensfeld T. Characterization of the intramuscular pharmacokinetics of ziprasidone in schizophrenic patients. *European Psychiatry*. 1998;13(S4):304s-5s.
213. Mitchell M, Earley W, Bari M, Riesenbergr R, Marquez E, Kurtz D, et al. P.2.081 A preliminary study of the pharmacokinetics and tolerability of higher dose oral olanzapine (20, 30, or 40mg/day) in stable patients with serious mental disorders. *Eur Neuropsychopharmacol*. 2003;13.
214. Mitchell M, Riesenbergr R, Bari MA, Marquez E, Kurtz D, Falk D, et al. A double-blind, randomized trial to evaluate the pharmacokinetics and tolerability of 30 or 40 mg/d oral olanzapine relative to 20 mg/d oral olanzapine in stable psychiatric subjects. *Clinical therapeutics*. 2006;28(6):881-92.
215. Modestin J, Toffler G, Pia M, Greub E. Haloperidol in acute schizophrenic inpatients. A double-blind comparison of two dosage regimens. *Pharmacopsychiatra*. 1983;16(4):121-6.
216. Mosholder AD. Review and evaluation of clinical data: NDA 20-639; quetiapine fumarate (seroquel). Food and Drug Administration, US Department of Health and Human Services 1996.
217. Nair CJ, Abraham G, Stanilla JK, Tracy JI, de Leon J, Simpson GM, et al. Therapeutic effects of clozapine on tardive dyskinesia. *Cognitive and Behavioral Practice*. 1998;5(1):123-31.
218. Nakamura T, Kubota T, Iwakaji A, Imada M, Kapás M, Morio Y. Clinical pharmacology study of cariprazine (MP-214) in patients with schizophrenia (12-week treatment). *Drug design, development and therapy*. 2016;10:327-38.
219. Nasrallah HA, Gopal S, Gassmann-Mayer C, Quiroz JA, Lim P, Eerdeken M, et al. A controlled, evidence-based trial of paliperidone palmitate, a long-acting injectable antipsychotic, in schizophrenia. *Int J Neuropsychopharmacol*. 2010;35(10):2072-82.
220. Nasrallah HA, Silva R, Phillips D, Cucchiario J, Hsu J, Xu J, et al. Lurasidone for the treatment of acutely psychotic patients with schizophrenia: a 6-week, randomized, placebo-controlled study. *J Psychiatr Res*. 2013;47(5):670-7.
221. Nasser AF, Henderson DC, Fava M, Fudala PJ, Twumasi-Ankrah P, Kouassi A, et al. Efficacy, Safety, and Tolerability of RBP-7000 Once-Monthly Risperidone for the Treatment of Acute Schizophrenia: An 8-Week, Randomized, Double-Blind, Placebo-Controlled, Multicenter Phase 3 Study. *Journal of clinical psychopharmacology*. 2016;36(2):130-40.
222. Sunovion. A Comparison of Study Drug With Placebo and Haloperidol in Patients With Schizophrenia 2011 [updated 17.04.2020. Available from: <https://clinicaltrials.gov/ct2/show/NCT00044044>.
223. Pfizer. A Study of the Safety and Tolerability of Oral Ziprasidone in Children and Teens With Psychotic Disorders 2008 [updated 10.04.2008. Available from: <https://clinicaltrials.gov/ct2/show/NCT00650611>.
224. Sunovion. Safety and Tolerability Study of Drug to Treat Schizophrenia 2011 [updated 17.04.2020. Available from: <https://clinicaltrials.gov/ct2/show/NCT00044005>.
225. de Haan L, van Bruggen M, Lavalaye J, Booij J, Dingemans PM, Linszen D. Subjective experience and D2 receptor occupancy in patients with recent-onset schizophrenia treated with low-dose olanzapine or haloperidol: a randomized, double-blind study. *AmJPsychiatry*. 2003;160:303-9.
226. Meltzer HY, Bobo WV, Nuamah IF, Lane R, Hough D, Kramer M, et al. Efficacy and tolerability of oral paliperidone extended-release tablets in the treatment of acute schizophrenia: pooled data from three 6-week, placebo-controlled studies. *The Journal of clinical psychiatry*. 2008;69(5):817-29.
227. Johnson & Johnson Pharmaceutical Research & Development LLC. Safety Study With Paliperidone ER Extended-Release (ER) Tablets in Geriatric Patients With Schizophrenia 2004 [updated 08.06.2011. Available from: <https://clinicaltrials.gov/ct2/show/NCT00085748>.

228. Johnson & Johnson Pharmaceutical Research & Development LLC. Investigate Risperidone for the Treatment of Schizophrenia in Adolescents 2004 [updated 08.06.2011]. Available from: <https://clinicaltrials.gov/ct2/show/NCT00088075>.
229. Johnson & Johnson Pharmaceutical Research & Development LLC. A Study to Evaluate the Effectiveness and Safety of 3 Doses of Paliperidone Palmitate in Treating Subjects With Schizophrenia 2005 [updated 08.06.2011]. Available from: <https://clinicaltrials.gov/ct2/show/NCT00210548>.
230. Johnson & Johnson Pharmaceutical Research & Development LLC. A Study to Compare the Effectiveness and Safety of Flexibly Varied Doses of Paliperidone Palmitate and Risperidone in Treating Patients With Schizophrenia 2005 [updated 08.06.2011]. Available from: <https://clinicaltrials.gov/ct2/show/NCT00210717>.
231. Otsuka Pharmaceutical Development & Commercialization I. A Switch Study of BMS-337039 in Schizophrenic Out-patients 2005 [updated 08.11.2013]. Available from: <https://clinicaltrials.gov/ct2/show/NCT00232687>.
232. Otsuka Pharmaceutical Development & Commercialization I. A Study of Aripiprazole in the Management of Patients With Schizophrenia in the General Psychiatric Practices 2005 [updated 08.11.2013]. Available from: <https://clinicaltrials.gov/ct2/show/NCT00237939>.
233. Lindenmayer JP. High Dose of Quetiapine in Treating Subjects With Treatment Refractory Schizophrenia or Schizoaffective Disorder (HDQ) 2006 [updated 17.04.2015]. Available from: <https://clinicaltrials.gov/ct2/show/NCT00297947>.
234. EliLilly. Examining Rapid Acting Intra-Muscular Olanzapine in Japanese Patients With Schizophrenia 2007 [updated 13.06.2007]. Available from: <https://clinicaltrials.gov/ct2/show/NCT00485810>.
235. JanssenPharmaceutical. A Pharmacokinetic and Safety Study of Risperidone Long Acting Injectable in Schizophrenic Patients 2008 [updated 17.05.2011]. Available from: <https://clinicaltrials.gov/ct2/show/NCT00653406>.
236. H.Lundbeck. Efficacy of Bifeprunox in Patients With Schizophrenia 2008 [updated 27.09.2010]. Available from: <https://clinicaltrials.gov/ct2/show/NCT00704509>.
237. Sumitomo Dainippon Pharma Co. L. Study of SM-13496 (Lurasidone HCl) in Patients With Schizophrenia 2008 [updated 19.10.2018]. Available from: <https://clinicaltrials.gov/ct2/show/NCT00711269>.
238. Johnson & Johnson Pharmaceutical Research & Development LLC. A Safety and Pharmacokinetic Study of ER OROS Paliperidone in Pediatric Patients With Schizophrenia, Schizoaffective Disorder, or Schizophreniform Disorder 2008 [updated 08.06.2011]. Available from: <https://clinicaltrials.gov/ct2/show/NCT00796081>.
239. Mitsubishi\_Tanabe\_Pharma\_Corporation. Safety, Pharmacokinetics and Efficacy Study of MP-214 in Patients With Schizophrenia 2009 [updated 10.09.2009]. Available from: <https://clinicaltrials.gov/ct2/show/NCT00862992>.
240. ForestLaboratories. Safety and Efficacy of Cariprazine (RGH-188) in the Acute Exacerbation of Schizophrenia 2008 [updated 12.06.2020]. Available from: <https://clinicaltrials.gov/ct2/show/NCT00694707>.
241. Otsuka Pharmaceutical Development & Commercialization I. Study to Evaluate the Efficacy, Safety, and Tolerability of Oral OPC-34712 and Aripiprazole for Treatment of Acute Schizophrenia (STEP 203) 2009 [updated 20.10.2015]. Available from: <https://clinicaltrials.gov/ct2/show/NCT00905307>.
242. Sunovion. The Bioequivalence Of Two Different Lurasidone Formulations In Patients 2010 [updated 08.09.2011]. Available from: <https://clinicaltrials.gov/ct2/show/NCT01082250>.
243. Dohme-\_Corp. MS. Long-term Extension Trial of Asenapine in Subjects With Schizophrenia (Study P06125) 2016 [updated 17.10.2020]. Available from: <https://clinicaltrials.gov/ct2/show/NCT01142596>.
244. H.Lundbeck. Study of the Safety, Tolerability, and Pharmacokinetics of Once Weekly Zicronapine in Patients With Schizophrenia 2016 [updated 22.03.2016]. Available from: <https://clinicaltrials.gov/ct2/show/NCT01377233>.
245. Otsuka Pharmaceutical Development & Commercialization I. Trial to Evaluate the Effects of OPC-34712 on QT/QTc in Subjects With Schizophrenia or Schizoaffective



- Disorder 2015 [updated 29.10.2015. Available from: <https://clinicaltrials.gov/ct2/show/NCT01423916>.
246. Alkermes. A Study of ALKS 9072 in Subjects With Chronic Stable Schizophrenia 2018 [updated 29.08.2018. Available from: <https://clinicaltrials.gov/ct2/show/NCT01493726>.
247. Janssen\_Pharmaceutical\_K.K. A Pharmacokinetic and Safety Study of Paliperidone Palmitate (JNS010) in Participants With Schizophrenia 2013 [updated 05.06.2013. Available from: <https://clinicaltrials.gov/ct2/show/NCT01606254>.
248. Mitsubishi\_Tanabe\_Pharma\_Corporation. Safety and Efficacy of MP-214 in Patients With Schizophrenia 2016 [Available from: <https://clinicaltrials.gov/ct2/show/NCT01625000>.
249. Mitsubishi\_Tanabe\_Pharma\_Corporation. A Long-Term Study of MP-214 in Patients With Chronic Phase or Elderly Schizophrenia 2015 [Available from: <https://clinicaltrials.gov/ct2/show/NCT01625897>.
250. Alkermes. A Long-term Safety Study of ALKS 9072 (Also Known as ALKS 9070) 2016 [updated 25.09.2018. Available from: <https://clinicaltrials.gov/ct2/show/NCT01626456>.
251. Mitsubishi\_Tanabe\_Pharma\_Corporation. A Pharmacokinetic Study of MP-214 in Patients With Schizophrenia 2014 [Available from: <https://clinicaltrials.gov/ct2/show/NCT01626859>.
252. Mitsubishi\_Tanabe\_Pharma\_Corporation. Long-Term Study of MP-214 in Patients With Schizophrenia 2017 [updated 06.04.2017. Available from: <https://clinicaltrials.gov/ct2/show/NCT01626872>.
253. Janssen\_Pharmaceutical\_K.K. A Clinical Pharmacology Study of JNS010 (Paliperidone Palmitate) in Patients With Schizophrenia 2013 [updated 16.09.2013. Available from: <https://clinicaltrials.gov/ct2/show/NCT01942382>.
254. Kahn RS. European Long-acting Antipsychotics in Schizophrenia Trial (EULAST): UMC Utrecht; 2020 [updated 01.09.2020. Available from: <https://clinicaltrials.gov/ct2/show/NCT02146547>.
255. Sumitomo Pharmaceutical (Suzhou) Co. L. A Pharmacokinetic Study of Lurasidone After Single Oral Administration in Healthy Subjects 2019 [updated 11.01.2019. Available from: <https://clinicaltrials.gov/ct2/show/NCT02174510>.
256. Luye\_Pharma\_Group\_Ltd. A Study to Determine Pharmacokinetic Characteristics of LY03010 Versus INVEGA SUSTENNA® in Schizophrenia Patients 2019 [updated 13.08.2020. Available from: <https://clinicaltrials.gov/ct2/show/NCT03751488>.
257. Allergan. Efficacy and Safety of Cariprazine in the Treatment of Adolescent Participants (13 to 17 Years of Age) With Schizophrenia 2019 [updated 29.10.2020. Available from: <https://www.clinicaltrials.gov/ct2/show/NCT03817502>.
258. Rovi\_Pharmaceuticals\_Laboratories. Study to Evaluate the Efficacy and Safety of Risperidone ISM® in Patients With Acute Schizophrenia: Open Label Extension (PRISMA-3\_ OLE) 2019 [updated 05.02.2020. Available from: <https://clinicaltrials.gov/ct2/show/NCT03870880>.
259. Otsuka Pharmaceutical Development & Commercialization I. Trial to Assess the Bioavailability of Quetiapine Versus Seroquel® in Subjects With Schizophrenia or Bipolar Disorder 2019 [updated 02.09.2020. Available from: <https://clinicaltrials.gov/ct2/show/NCT03872596>.
260. Otsuka Pharmaceutical Development & Commercialization I. A Trial of Multiple-doses of Aripiprazole in Adults With Schizophrenia or Bipolar 1 Disorder 2019 [updated 02.09.2020. Available from: <https://clinicaltrials.gov/ct2/show/NCT04030143>.
261. Neborsky R, Janowsky D, Munson E, Depry D. Rapid treatment of acute psychotic symptoms with high- and low-dose haloperidol. Behavioral considerations. Archives of general psychiatry. 1981;38(2):195-9.
262. Odejide OA, Aderounmu AF. Double-blind placebo substitution: withdrawal of fluphenazine decanoate in schizophrenic patients. The Journal of clinical psychiatry. 1982;43(5):195-6.
263. Ogasa M, Kimura T, Nakamura M, Guarino J. Lurasidone in the treatment of schizophrenia: a 6-week, placebo-controlled study. Psychopharmacology. 2013;225(3):519-30.

264. Ono H, Murasaki M, Sasaki Y, Bille A. Open-label, randomized, exploratory study showed rapid-acting intramuscular olanzapine 7.5 mg and 10 mg were effective in agitated Japanese schizophrenia patients. *Neuropsychopharmacology : official publication of the American College of Neuropsychopharmacology*. 2006;9(Suppl 1):S266.
265. Ono H, Fujikoshi S, Oka T, Sugiura M, Takahashi M. A double-blind dose-response study comparing rapid acting intramuscular olanzapine and placebo in agitated schizophrenia. *Eur Neuropsychopharmacol*. 2008;18(Supplement 4):S410.
266. Oosthuizen P, Emsley R, Jadri Turner H, Keyter N. A randomized, controlled comparison of the efficacy and tolerability of low and high doses of haloperidol in the treatment of first-episode psychosis. *Int J Neuropsychopharmacol*. 2004;7(2):125-31.
267. Oren DA, Manos G, Markovic O, McQuade RD. Intramuscular aripiprazole for the treatment of acute agitation associated with schizophrenia: Sub-analysis of a double-blind, controlled, dose-ranging study. *European Psychiatry*. 2007;22(S1):S124.
268. Ortega-Soto H, Brunner E, Apiquian R, de la Torre P. Therapeutic Minimum Dose of Haloperidol (HLP) in Schizophrenia. *Int J Neuropsychopharmacol*. 1994;10(3S):140S.
269. Ota KY, Kurland AA. A double-blind comparison of haloperidol oral concentrate, haloperidol solutabs and placebo in the treatment of chronic schizophrenia. *The Journal of clinical pharmacology and new drugs*. 1973;13(2):99-110.
270. Palao DJ, Arauxo A, Brunet M, Bernardo M, Haro JM, Ferrer J, et al. Haloperidol: therapeutic window in schizophrenia. *Journal of clinical psychopharmacology*. 1994;14(5):303-10.
271. Pandina GJ, Lindenmayer JP, Lull J, Lim P, Gopal S, Herben V, et al. A randomized, placebo-controlled study to assess the efficacy and safety of 3 doses of paliperidone palmitate in adults with acutely exacerbated schizophrenia. *Journal of clinical psychopharmacology*. 2010;30(3):235-44.
272. Petrie JL, Saha AR, McEvoy JP. Aripiprazole, a new typical antipsychotic: Phase 2 clinical trial result. *Eur Neuropsychopharmacol*. 1997;7(1002):S227.
273. Peuskens J, Trivedi J, Malyarov S, Brecher M, Svensson O, Miller F, et al. Prevention of schizophrenia relapse with extended release quetiapine fumarate dosed once daily: a randomized, placebo-controlled trial in clinically stable patients. *Psychiatry (Edgmont)*. 2007;4(11):34-50.
274. Potkin SG, Shen YC, Zhou DF, Pardes H, Shu L, Phelps B, et al. Does a therapeutic window for plasma haloperidol exist?: Preliminary Chinese data. *Psychopharmacology bulletin*. 1985;21(1):59-61.
275. Potkin SG, Bera R, Gulasekaram B, Costa J, Hayes S, Jin Y, et al. Plasma clozapine concentrations predict clinical response in treatment-resistant schizophrenia. *The Journal of clinical psychiatry*. 1994;55 Suppl B:133-6.
276. Potkin SG, Saha AR, Kujawa MJ, Carson WH, Ali M, Stock E, et al. Aripiprazole, an antipsychotic with a novel mechanism of action, and risperidone vs placebo in patients with schizophrenia and schizoaffective disorder. *Archives of general psychiatry*. 2003;60(7):681-90.
277. Potkin SG, Litman RE, Torres R, Wolfgang CD. Efficacy of iloperidone in the treatment of schizophrenia: initial phase 3 studies. *Journal of clinical psychopharmacology*. 2008;28(2 Suppl 1):S4-11.
278. Potkin SG, Preskorn S, Hochfeld M, Meng X. A thorough QTc study of 3 doses of iloperidone including metabolic inhibition via CYP2D6 and/or CYP3A4 and a comparison to quetiapine and ziprasidone. *Journal of clinical psychopharmacology*. 2013;33(1):3-10.
279. Potkin SG, Keator DB, Kesler-West ML, Nguyen DD, van Erp TG, Mukherjee J, et al. D2 receptor occupancy following lurasidone treatment in patients with schizophrenia or schizoaffective disorder. *CNS spectrums*. 2014;19(2):176-81.
280. Prien RF CJ. High dose chlorpromazine therapy in chronic schizophrenia. Report of National Institute of Mental Health--psychopharmacology research branch collaborative study group. *Archives of general psychiatry*. 1968;18(4):482-95.
281. Prien RF, Levine J, Cole JO. High dose trifluoperazine therapy in chronic schizophrenia. *The American journal of psychiatry*. 1969;126(3):305-13.

282. Puech A, Fleurot O, Rein W. Amisulpride, and atypical antipsychotic, in the treatment of acute episodes of schizophrenia: a dose-ranging study vs. haloperidol. The Amisulpride Study Group. *Acta Psychiatrica Scandinavica*. 1998;98(1):65-72.
283. Quitkin F, Rifkin A, Klein DF. Very high dosage vs standard dosage fluphenazine in schizophrenia. A double-blind study of nonchronic treatment-refractory patients. *Archives of general psychiatry*. 1975;32(10):1276-81.
284. Ravenstijn P, Remmerie B, Savitz A, Samtani MN, Nuamah I, Chang CT, et al. Pharmacokinetics, safety, and tolerability of paliperidone palmitate 3-month formulation in patients with schizophrenia: A phase-1, single-dose, randomized, open-label study. *Journal of clinical pharmacology*. 2016;56(3):330-9.
285. Rein W, Turjanski S, Fleurot O. Amisulpride in the treatment of deficit schizophrenia. *Proceeding of the 10th World Congress of Psychiatry*; 1996 Aug 23-28; Madrid, Spain 1996.
286. Reschke RW. Parenteral haloperidol for rapid control of severe, disruptive symptoms of acute schizophrenia. *Diseases of the nervous system*. 1974;35(3):112-5.
287. Rifkin A, Quitkin F, Rabiner CJ, Klein DF. Fluphenazine decanoate, fluphenazine hydrochloride given orally, and placebo in remitted schizophrenics. I. Relapse rates after one year. *Archives of general psychiatry*. 1977;34(1):43-7.
288. Rifkin A, Doddi S, Karajgi B, Borenstein M, Wachspress M. Dosage of haloperidol for schizophrenia. *Archives of general psychiatry*. 1991;48(2):166-70.
289. Rodriguez S, Lasser R, Turkoz I, Urioste R, Burks EJ, Gharabawi G. Long-term long-acting risperidone: QoL and functioning in schizophrenia. *Proceedings of the 157th Annual Meeting of the American Psychiatric Association*; 2004 May 1-6; New York, USA 2004.
290. Roelofs GA. Penfluridol (R 16 341) as a maintenance therapy in chronic psychotic patients: a double-blind clinical evaluation. *Acta Psychiatrica Scandinavica*. 1974;50(2):219-24.
291. Rossenu S, Cleton A, Talluri K, Francetic I, Canuso C, Remmerie B, et al. Pharmacodynamics of paliperidone extended-release tablets and immediate-release risperidone in schizophrenia. *Schizophrenia research*. 2008;98:159.
292. Rui Q, Wang Y, Liang S, Liu Y, Wu Y, Wu Q, et al. Relapse prevention study of paliperidone extended-release tablets in Chinese patients with schizophrenia. *Progress in neuro-psychopharmacology & biological psychiatry*. 2014;53:45-53.
293. Ruiz M, Quintana LM, Vilalta JS. Estudio clinico con pimocida en las esquizofrenias de evolucion cronica. *Revista de Psiquiatria y Psicologia Medicina*. 1975;4:247-56.
294. Ruskin PE, Nyman G. Discontinuation of neuroleptic medication in older, outpatient schizophrenics. A placebo-controlled, double-blind trial. *The Journal of nervous and mental disease*. 1991;179(4):212-4.
295. Sampath G, Shah A, Krska J, Soni SD. Neuroleptic discontinuation in the very stable schizophrenic patient: Relapse rates and serum neuroleptic levels. *Human Psychopharmacology: Clinical and Experimental*. 1992;7(4):255-64.
296. Santos JL, Cabranes JA, Vazquez C, Fuentenebro F, Almoguera I, Ramos JA. Clinical response and plasma haloperidol levels in chronic and subchronic schizophrenia. *Biological psychiatry*. 1989;26(4):381-8.
297. Sarin A, Nagpal J, Bohra NK, Jiloha RC, Rao GP, Sharma SK, et al. Open labeled, randomized, switch-over study of two fixed doses (10/15mg) of aripiprazole : to evaluate its safety and efficacy in the treatment of Indian patients of schizophrenia. *Indian J Psychiatry*. 2004;46(1):64-71.
298. Schooler NR, Siu C. Ziprasidone's effect on anxiety in a group of outpatients with stable schizophrenia. *Int J Neuropsychopharmacol*. 2000;3(Suppl 1):S104.
299. Shawver JR, Gorham DR, Leskin LW, Good WW, Kabnick DE. Comparison of chlorpromazine and reserpine in maintenance drug therapy. *Diseases of the nervous system*. 1959;20:452-7.
300. Sim CB, Lee YC, Hwang JP. Haloperidol for schizophrenic inpatients with three dose regimens. *Psychiatry Today*. 1989:817.
301. Simpson GM, Angus JW, Edwards JG. A controlled study of haloperidol in chronic schizophrenia. *Curr Ther Res Clin Exp*. 1967;9(8):407-12.

302. Simpson GM, Josiassen RC, Stanilla JK, de Leon J, Nair C, Abraham G, et al. Double-blind study of clozapine dose response in chronic schizophrenia. *The American journal of psychiatry*. 1999;156(11):1744-50.
303. Singh H, Levinson DF, Simpson GM, Lo ES, Friedman E. Acute dystonia during fixed-dose neuroleptic treatment. *Journal of clinical psychopharmacology*. 1990;10(6):389-96.
304. Singh J, Robb A, Vijapurkar U, Nuamah I, Hough D. A Randomized, Double-Blind Study of Paliperidone Extended-Release in Treatment of Acute Schizophrenia in Adolescents. *Biological psychiatry*. 2011;70(12):1179-87.
305. Smith RC, Baumgartner R, Misra CH, Mauldin M, Shvartsburd A, Ho BT, et al. Haloperidol. Plasma levels and prolactin response as predictors of clinical improvement in schizophrenia: chemical v radioreceptor plasma level assays. *Archives of general psychiatry*. 1984;41(11):1044-9.
306. Smith RC. Plasma Haloperidol Levels and Clinical Response. *Archives of general psychiatry*. 1987;44(12):1110-2.
307. Soria JM, Santiuste MA, Salorio P. Efecto de la medicacion neuroleptica sobre la conducta en la esquizofrenia cronica. *Psiquis*. 1994;15(3):21-5.
308. Stewart M, DelBello MP, Versavel M, Keller D. Psychosocial functioning and health-related quality of life in children and adolescents treated with open-label ziprasidone for bipolar mania, schizophrenia, or schizoaffective disorder. *Journal of child and adolescent psychopharmacology*. 2009;19(6):635-40.
309. Stone CK, Garve DL, Griffith J, Hirschowitz J, Bennett J. Further evidence of a dose-response threshold for haloperidol in psychosis. *The American journal of psychiatry*. 1995;152(8):1210-2.
310. Sun L, McDonnell D, von Moltke L. Pharmacokinetics and Short-term Safety of ALKS 3831, a Fixed-dose Combination of Olanzapine and Samidorphan, in Adult Subjects with Schizophrenia. *Clinical therapeutics*. 2018;40(11):1845-54.e2.
311. Švestka J. Intramuscular ziprasidone - A rapid-acting antipsychotic of the 2nd generation. *Psychiatrie*. 2003;7:110-6.
312. Swift RH, Harrigan EP, Cappelleri JC, Kramer D, Chandler LP. Validation of the behavioural activity rating scale (BARS): a novel measure of activity in agitated patients. *J Psychiatr Res*. 2002;36(2):87-95.
313. Takeuchi H, Suzuki T, Remington G, Watanabe K, Mimura M, Uchida H. Lack of effect of risperidone or olanzapine dose reduction on subjective experiences in stable patients with schizophrenia. *Psychiatry research*. 2014;218(1-2):244-6.
314. Turncliff R, Potocka E, Corey L, Lowy A, Marandi M, DeSomer M, et al. ALKS 9070, a novel once monthly prodrug of aripiprazole, achieves therapeutic levels and is well-tolerated in adults with schizophrenia. *European Neuropsychopharmacology*. 2012;22(Suppl. 2):S330-S1.
315. Uzun S, Folnegović-Šmalc V, Mimica N, Ljubin Golub T, Makarić G, Ivezić S, et al. Ziprasidone clinical trials conducted in Croatia. *Schizophrenia research*. 2002;53(Suppl 3):182.
316. van Erp TG, Baker RA, Cox K, Okame T, Kojima Y, Eramo A, et al. Effect of brexpiprazole on control of impulsivity in schizophrenia: A randomized functional magnetic resonance imaging study. *Psychiatry research Neuroimaging*. 2020;301:111085.
317. van Kammen DP, McEvoy JP, Targum SD, Kardatzke D, Sebree TB. A randomized, controlled, dose-ranging trial of sertindole in patients with schizophrenia. *Psychopharmacology*. 1996;124(1-2):168-75.
318. Van Putten T, Marder S. Low-Dose Treatment Strategies. *The Journal of clinical psychiatry*. 1986;47(Suppl 5):12-6.
319. Van Putten T, Marder SR, May PR, Poland RE, O'Brien RP. Plasma levels of haloperidol and clinical response. *Psychopharmacology bulletin*. 1985;21(1):69-72.
320. Van Putten T, Marder SR, Mintz J. A controlled dose comparison of haloperidol in newly admitted schizophrenic patients. *Archives of general psychiatry*. 1990;47(8):754-8.

321. Van Putten T, Aravagiri M, Marder SR, Wirshing WC, Mintz J, Chabert N. Plasma fluphenazine levels and clinical response in newly admitted schizophrenic patients. *Psychopharmacology bulletin*. 1991;27(2):91-6.
322. Vandecasteele AJA, Vereecken JLT. A double-blind clinical evaluation of penfluridol (R 16 341) as maintenance therapy in schizophrenia. *Acta Psychiatrica Scandinavica*. 1974;50(3):346-53.
323. Vanover K, Glass S, O'Gorman C, Saillard J, Weingart M, Correll C, et al. Advancing the Clinical Development of ITI-007 - Update on Efficacy for the Treatment of Schizophrenia. *Int J Neuropsychopharmacol*. 2016;41:S232-3.
324. Vanover KE, Davis RE, O'Gorman C, Saillard J, Weingart M, Mates S. Unique Pharmacology of ITI-007 Confers Efficacy in the Treatment of Schizophrenia at Low Striatal D2 Receptor Occupancy Levels. *Biological psychiatry*. 2016;79:S354-S5.
325. Vinar O, Taussigová D, Bastecký J, Boleloucký Z. Long acting peroral fluphenazine and its dosage in psychoses. *Activitas nervosa superior*. 1970;12(3):248-9.
326. Walling D, Hard M, Wehr A, Du Y, Weiden P, Moltke L. F197. Aripiprazole Lauroxil NanoCrystal® Dispersion: A Potential 1-Day Initiation Regimen for Long-Acting Aripiprazole Lauroxil. *Biological psychiatry*. 2018;83:S315.
327. Wehnert A, Rasmussen C. Sertindole improves cognitive functioning in schizophrenic patients: results of a five-factor component analysis of sertindole. *Schizophrenia research*. 1999;36(1-3):301.
328. Weiden PJ, Manning R, Wolfgang CD, Ryan JM, Mancione L, Han G, et al. A Randomized Trial of Iloperidone for Prevention of Relapse in Schizophrenia: The REPRIEVE Study. *CNS drugs*. 2016;30(8):735-47.
329. Wessels WH, Gagiano CA, Emsley RA, Hart GAD, Daubenton F, Bodemer W, et al. Risperidone (64766) in the treatment of chronic schizophrenic patients. *Biological psychiatry*. 1991;29:705S-22S.
330. Wiles D, Franklin M, Dencker SJ, Johansson R, Lundin L, Malm U. Plasma fluphenazine and prolactin levels in schizophrenic patients during treatment with low and high doses of fluphenazine enanthate. *Psychopharmacology*. 1980;71(2):131-6.
331. Winter M, Lehmann E, Scholz OB. Effects of high and low dosage of haloperidol on the brain in relation to schizophrenic thought disorder. *Neuropsychobiology*. 1984;12(2-3):115-21.
332. Witte MM, Case MG, Schuh KJ, Ascher-Svanum H. Effects of olanzapine long-acting injection on levels of functioning among acutely ill patients with schizophrenia. *Current medical research and opinion*. 2012;28(3):315-23.
333. Yamagami S, Mui K, Koide K, Okuno M, Onishi H, Hirayama E. A correlation among clinical response, plasma levels of haloperidol and prolactin in chronic schizophrenia. *Proceedings of the 17th Collegium Internationale Neuro-Psychopharmacologicum Congress: 1990 Sep 1014; Kyoto, Japan 1990*.
334. Younis IR, Laughren TP, Wang Y, Mathis M, Gobburu JV. Learn-apply approach for establishing dosing recommendations: paliperidone for the treatment of adolescent schizophrenia. *Clinical pharmacology and therapeutics*. 2012;91:S54-S5.
335. Zimbroff DL, Kane JM, Tamminga CA, Daniel DG, Mack RJ, Wozniak PJ, et al. Controlled, dose-response study of sertindole and haloperidol in the treatment of schizophrenia. Sertindole Study Group. *The American journal of psychiatry*. 1997;154(6):782-91.
336. Zissis NP, Psaras M, Lyketsos G. Haloperidol decanoate, a new long-acting antipsychotic, in chronic schizophrenics: Double-blind comparison with placebo. *Current Therapeutic Research - Clinical and Experimental*. 1982;31(4):650-5.

**eAppendix 3. Assessment with the Cochrane Risk of bias tool, version2 : judgements about each bias item for each study for the primary outcome relapse**

| Study name              | Bias arising from the randomisation process | Bias due to deviations from intended interventions | Bias due to missing outcome data | Bias in measurement of the outcome | Bias in selection of the reported results | Overall risk of bias |
|-------------------------|---------------------------------------------|----------------------------------------------------|----------------------------------|------------------------------------|-------------------------------------------|----------------------|
| Arato 2002              | Low                                         | Some concerns                                      | Low                              | Some concerns                      | Low                                       | Some concerns        |
| Velligan 2002           | Low                                         | Low                                                | Low                              | Low                                | Low                                       | Low                  |
| Beasley 1996b_Extension | Some concerns                               | Low                                                | Some concerns                    | Low                                | Low                                       | Some concerns        |
| Beasley 1997_Extension  | Some concerns                               | Low                                                | High                             | Low                                | Low                                       | High                 |
| Carpenter 1999          | Some concerns                               | Low                                                | Low                              | Low                                | Low                                       | Some concerns        |
| Chen 2010               | Low                                         | Some concerns                                      | Low                              | Some concerns                      | Low                                       | Some concerns        |
| Cooper 2000b            | Low                                         | Some concerns                                      | Low                              | Some concerns                      | Low                                       | Some concerns        |
| Dotti 1979              | Some concerns                               | Some concerns                                      | Low                              | Some concerns                      | Low                                       | Some concerns        |
| Eklund 1991             | Some concerns                               | Some concerns                                      | Low                              | Some concerns                      | Low                                       | Some concerns        |
| Fleischhacker 2014      | Low                                         | Low                                                | Low                              | Low                                | Low                                       | Low                  |
| Hough 2009              | Low                                         | Low                                                | High                             | Low                                | Low                                       | High                 |

|                               |               |               |               |               |     |               |
|-------------------------------|---------------|---------------|---------------|---------------|-----|---------------|
| <b>Huttunen 1996</b>          | Some concerns | Some concerns | Low           | Some concerns | Low | Some concerns |
| <b>Kane 1979</b>              | Some concerns | Some concerns | Low           | Some concerns | Low | Some concerns |
| <b>Kane 1983</b>              | Some concerns | Low           | High          | Low           | Low | High          |
| <b>Kane 2002b</b>             | Low           | Low           | Low           | Low           | Low | Low           |
| <b>Kane 2010c</b>             | Low           | Low           | Low           | Low           | Low | Low           |
| <b>Kane 2012</b>              | Low           | Some concerns | Low           | Some concerns | Low | Some concerns |
| <b>Mallikaarjun 2013</b>      | Low           | Some concerns | High          | Some concerns | Low | High          |
| <b>Marder 1984</b>            | Some concerns | Low           | High          | Low           | Low | High          |
| <b>McEvoy 2007b_Extension</b> | Some concerns | Low           | High          | Low           | Low | High          |
| <b>Nishikawa 1982</b>         | Some concerns | Some concerns | Low           | Some concerns | Low | Some concerns |
| <b>Nishikawa 1984</b>         | Some concerns | Some concerns | Some concerns | Some concerns | Low | High          |
| <b>Pigott 2003</b>            | Low           | Some concerns | Low           | Some concerns | Low | Some concerns |
| <b>Schooler 1993</b>          | Some concerns | Some concerns | High          | Some concerns | Low | High          |
| <b>Simpson 2006</b>           | Low           | Low           | Low           | Low           | Low | Low           |

|                    |     |               |     |               |     |               |
|--------------------|-----|---------------|-----|---------------|-----|---------------|
| <b>Tandon 2016</b> | Low | Some concerns | Low | Some concerns | Low | Some concerns |
|--------------------|-----|---------------|-----|---------------|-----|---------------|

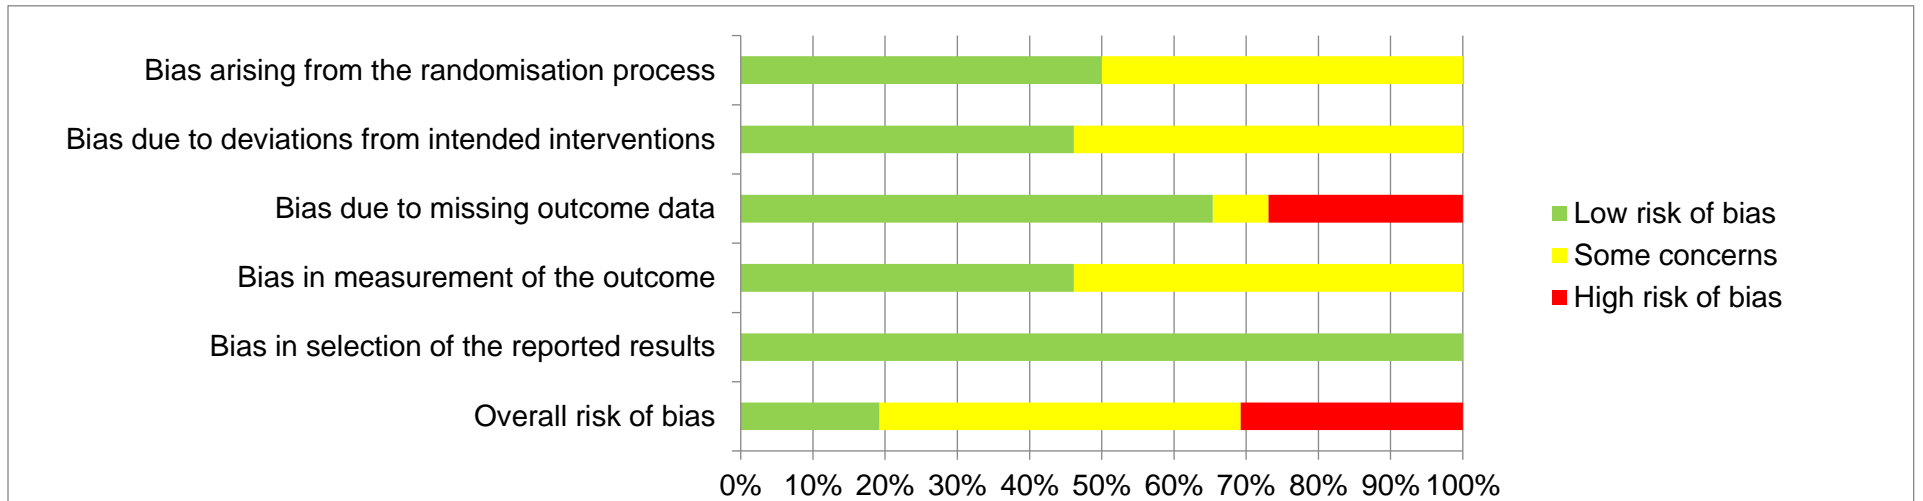



## **Explanations for our decisions concerning risk of bias judgements according to the risk of bias tool version 2**

For judgement of risk of bias, we followed the concept of the Cochrane Risk of Bias tool 2.(Sterne et al. 2019 and Higgins et al. 2019)

This tool provides a framework for evaluating potential risks of bias in five different domains and provides guidance by signaling questions. However, there are not always clear rules and specific situations found in the analyzed trials may deviate from the ideal case. Thus, judgement is needed to make decisions and these specific judgements and decisions made by the authors of the review are made explicit below.

### **Domain 1: RANDOMIZATION PROCESS**

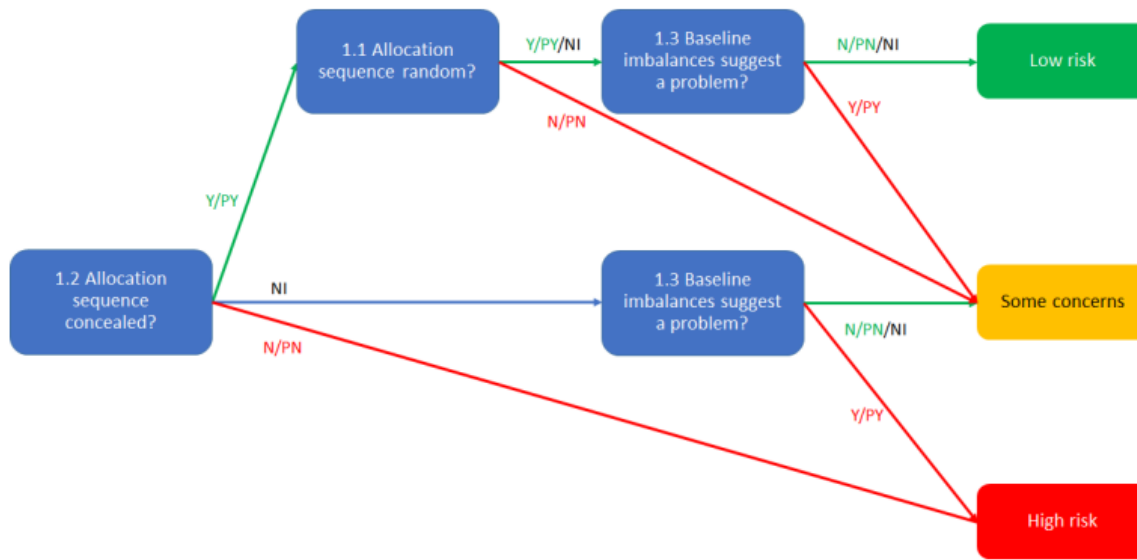

Algorithm for suggested judgement of risk of bias arising from the randomization process

### **1.1 Was the allocation sequence random?**

In principle, if there was no information about the exact methods (e.g. only stated “randomized”), we stated “not indicated”. For trials investigating second-generation-antipsychotic drugs that were sponsored by pharmaceutical companies, we assume that the sequence generation for randomization was appropriate, even when it is only stated “randomized”, and we stated “probably yes”. The reason is that we contacted many pharmaceutical companies in the past and all reported use of appropriate methods in these modern studies, even when it was not clearly stated in the primary publications.

### **1.2 Was the allocation sequence concealed until participants were enrolled and assigned to interventions?**

Similar to 1.1.

### 1.3 Did baseline differences between intervention groups suggest a problem with the randomization process?

No specific comments

## Domain 2: DEVIATIONS FROM INTENDED INTERVENTIONS

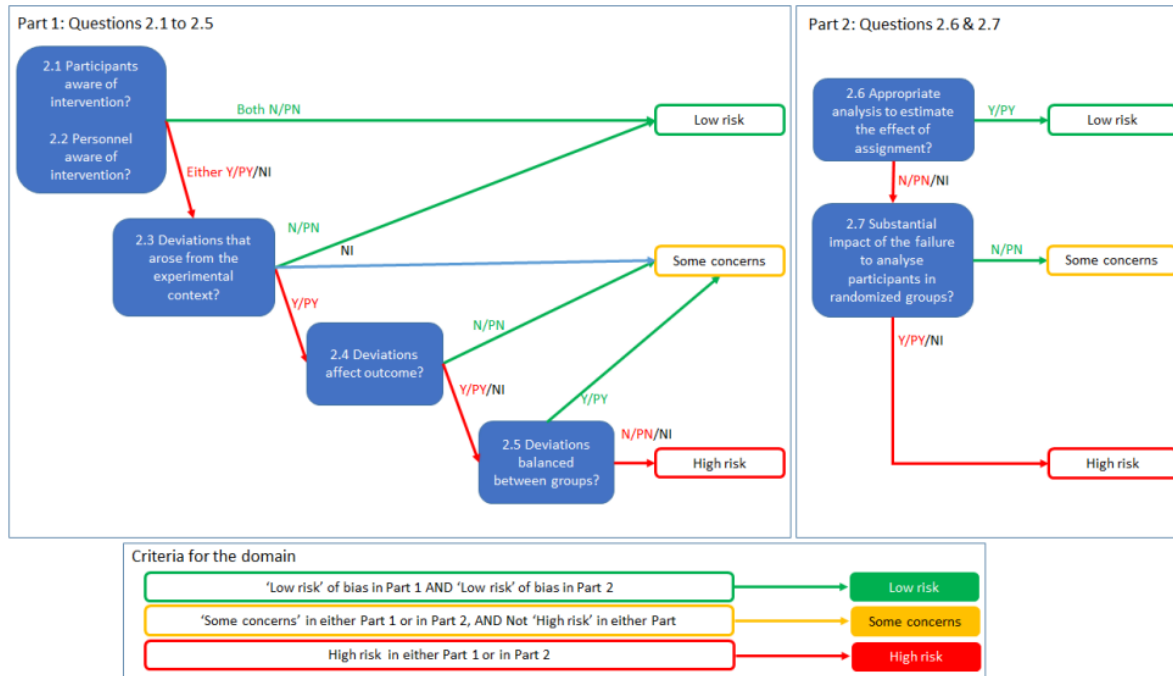

Algorithm for suggested judgement of risk of bias due to deviations from the intended interventions (effect of assignment to intervention)

## **Part 1:**

### **2.1 Were participants aware of their assigned intervention during the trial?**

If only stated “double-blind” without further information about the methods, a judgement is needed. We decided to assume that the method of blinding was appropriate and to state “probably no”, as in studies of antipsychotic drugs blinding can be rather easily achieved by encapsulating drugs with identical capsules.

In placebo-controlled trials, following the suggestion of the RoB2-guidance document, (Sterne et al. 2019) we assumed unblinding due to side effects. In head-to-head trials of antipsychotics, we did not make this assumption, because the different antipsychotics still have some similarities (overlapping receptor-binding-profiles). Consequently, differences in side-effects are more difficult to evaluate for patients and personal which makes it more difficult to guess the assigned intervention.

### **2.2 Were carers and people delivering the interventions aware of participants' assigned intervention during the trial?**

Similar to 2.1.

### **2.3 If Y/PY/NI to 2.1 or 2.2: Were there deviations from the intended intervention that arose because of the experimental context?**

This question is only relevant for unblinded studies (open, single-blind or placebo-controlled (unblinded due to side effects) trials).

Typically protocol deviations are not reported in detail, which leads to a judgement of “some concerns”.

Although protocol deviations due to the experimental context cannot be excluded, we do not deem that substantial protocol deviations (that potentially affect the outcome, see questions below), happen frequently. Thus, we do not expect important bias from deviations of the outcome and a judgement of “some concerns” seems fair or even too punitive.

### **2.4. Were these deviations likely to have affected the outcome?**

No specific comments

**2.5. Were these deviations from intended intervention balanced between groups?**

No specific comments

**Part 2:**

**2.6. Was an appropriate analysis used to estimate the effect of assignment to intervention?**

We considered completer analyses as inappropriate because from such analyses patients are excluded post-randomization due to toxicity or lack of efficacy.

**2.7. Was there potential for a substantial impact (on the results) of the failure to analyse participants in the group to which they were randomized?**

According to the guidance, authors need to decide about when exclusion of patients post-randomization could have a substantial impact on the results.

We considered completer analyses at “some concerns” when the total number of patients with premature study discontinuation was at maximum 20% of the number randomized.

We considered completer analyses at “high risk” when more than 20% of the patients randomized discontinued prematurely.

The decision for this threshold was informed by the work of Xia et al.(Xia et al. 2009)

## Domain 3: MISSING OUTCOME DATA

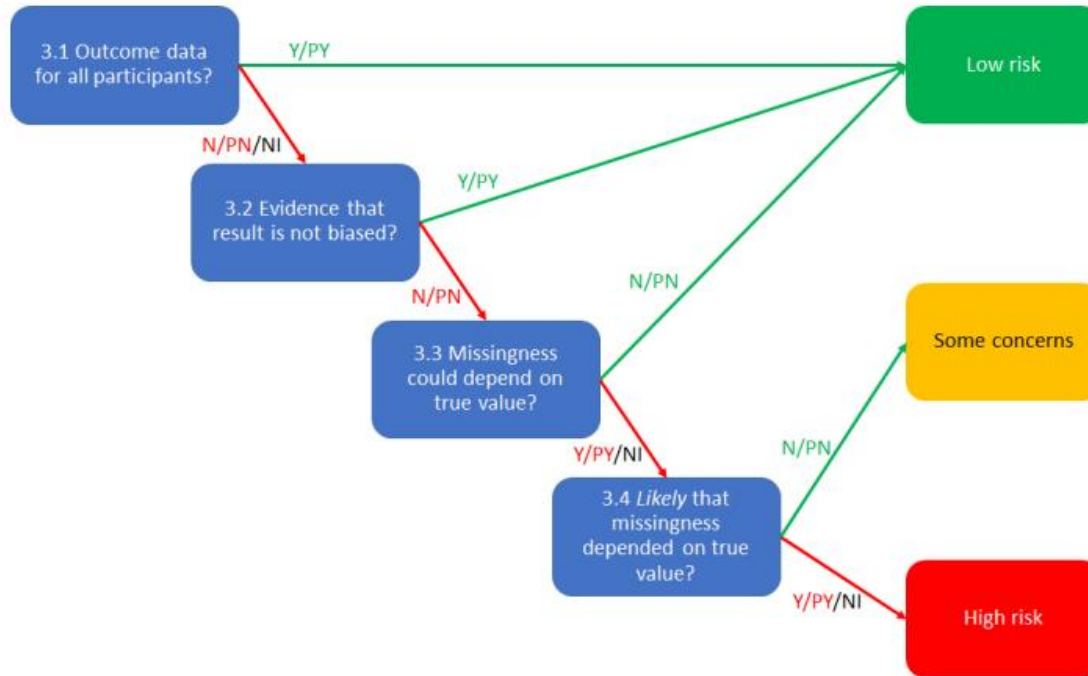

Algorithm for suggested judgement of risk of bias due to missing outcome data

### **3.1 Were data for this outcome available for all, or nearly all, participants randomized?**

We used the threshold of 5% (study discontinuation rate at maximum 5% of number of patients randomized) mentioned in the RoB2-guidance-document.

For the outcome “relapse” which we analyzed here, this threshold was applied to the number of participants who discontinued for reasons other than relapse.

### **3.2 If N/PN/NI to 3.1: Is there evidence that the result was not biased by missing outcome data?**

We conducted a sensitivity analysis as suggested by the RoB2-guidance-document using plausible assumptions (i.e. patients who discontinued due to inefficacy were assumed to have a relapse; patients who discontinued for reasons other than inefficacy were assumed to have the same relapse rate as observed in the trial (after counting discontinuation due to inefficacy as relapse)). We considered a result as at low risk of bias, when the result of the sensitivity analyses did not differ more than by a factor of 0.8/1.25 from the observed result (i.e. as an example, it is considered acceptable, when in the sensitivity 23 instead of 20 relapses were assumed to happen in a study group of 100 patients (and the event-rate in the other group did not change)).

### **3.3 If N/PN to 3.2: Could missingness in the outcome depend on its true value?**

If no reasons for study discontinuation are reported, then “probably yes”, because in studies of antipsychotics in schizophrenia, discontinuation due to lack of efficacy (potentially related to relapse) are likely.

Also, for many reported reasons, doubts remain whether the reason is related to efficacy.

Moreover, it needs to be noted that in our aggregate data (where events are usually reported from all patients randomized) also patients that discontinued due to reasons unrelated to the outcome can affect the result. This is because patients who discontinued prematurely are not at risk for the event anymore.

Thus, all studies with rates of premature study discontinuation above the threshold mentioned in 3.1 need further evaluation.

### **3.4 If Y/PY/NI to 3.3: Is it likely that missingness in the outcome depended on its true value?**

As recommended in the RoB2-guidance-document, we investigated whether there were differences in the total number of participants with premature study discontinuation (dropouts) and in the number of participants with premature study discontinuation for reasons related to the outcome. Thereby, we judged whether it is likely that missingness depended on the outcome and that missingness influenced the outcome substantially (high risk) or to some extent (some concerns).

For the outcome “relapse” analyzed here, we make use of the sensitivity analysis described in 3.2 which includes information about the total number of dropouts and the number of dropouts for related reasons, i.e. due to inefficacy. When the result of the sensitivity analysis differed less than by a factor of 0.67/1.50, but more than 0.8/1.25, from the observed result, then we judged the result at “some concerns”. When the result of the sensitivity analysis differed more than by a factor of 0.67/1.50, we judged the result at “high risk” (i.e. as an example, when in a sensitivity analysis more than 27 instead of 20 relapses were assumed in a study group of 100 participants (and the result of the other group did not change)).

When sensitivity analyses investigating the potential impact of missing data on the results were not possible (because information on study discontinuations was not clear enough), we judged the mechanism of missingness and its potential impact on the result according to the following algorithm:

When the rate of study discontinuation for reasons other than relapse was  $\leq 20\%$  (in each arm of a comparison), we judged at some concerns. This threshold was informed by the work of Sackett et al. (Sackett 1998) and Xia et al. (Xia et al. 2009). Otherwise proceed.

When the rate ratio of study discontinuation for reasons other than relapse (between two groups compared in a trial) is  $<0.5/ >2$  (half/double), we judged at high risk. Otherwise proceed.

When the rate of study discontinuation due to related reasons (i.e. due to inefficacy) was  $\leq 20\%$  (in each arm of a comparison), we judged at some concerns. Otherwise proceed.

When the rate of study discontinuation due to related reasons (between two groups compared in a trial) is  $<0.5/ >2$  (half/double), we judged at high risk of bias, when  $\geq 0.5/ \leq 2$ , we judge at some concerns.)



**Domain 4: MEASUREMENT OF THE OUTCOME**

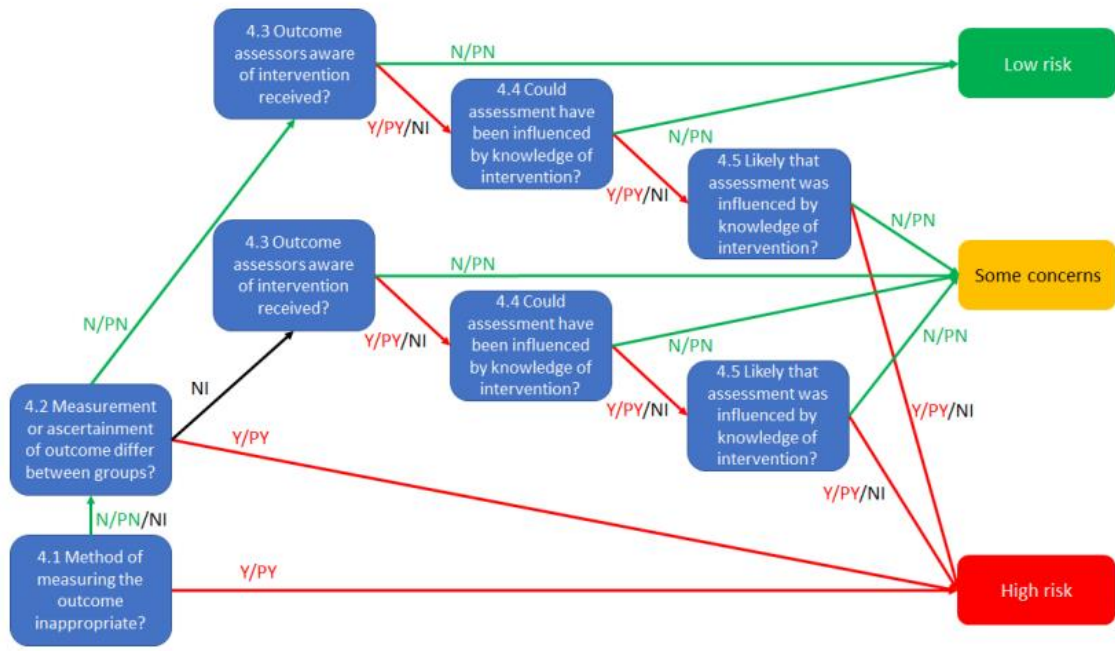

Algorithm for suggested judgement of risk of bias in measurement of the outcome

**4.1. Was the method of measuring the outcome inappropriate?**

No specific comments

**4.2. Could measurement or ascertainment of the outcome have differed between intervention groups?**

No specific comments

#### **4.3. Were outcome assessors aware of the intervention received by study participants?**

In head-to-head studies of antipsychotic drugs, when only reported that the study was double-blind, we assumed that blinding was appropriate and stated probably yes (similar to 2.1.).

In open trials or double-blind placebo-controlled trials (with potential unblinding of study personal, see 2.1.) we checked if there were particular methods to blind the outcome assessors. If such particular methods were not explicitly described, we assumed that the outcomes were assessed by study personal and answered “probably yes”.

#### **4.4 If Y/PY/NI to 4.3: Could assessment of the outcome have been influenced by knowledge of intervention received?**

We considered the outcome “relapse” as potentially influenced by knowledge of the intervention received.

#### **4.5 If Y/PY/NI to 4.4: Is it likely that assessment of the outcome was influenced by knowledge of intervention received?**

In general, we considered the influence of knowledge of intervention received as minor, resulting in a judgement of some concerns.

### **Domain 5: SELECTION OF THE REPORTED RESULTS**

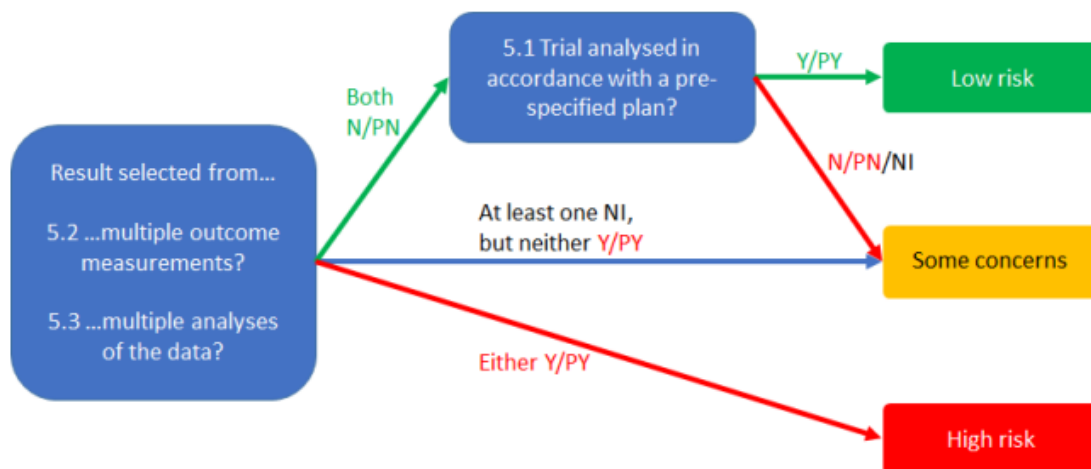

Algorithm for suggested judgement of risk of bias in selection of the reported result

**5.1. Were the data that produced this result analysed in accordance with a pre-specified analysis plan that as finalized before unblinded outcome data were available for analysis?**

Typically, the analysis plan was not available. In this case, we followed the recommendations of the Cochrane handbook(Higgins 2020) and compared the reported results with the reported methods section and with the outcomes that are expected for such trials as informed by other trial.

**Is the numerical result being assessed likely to have been selected, on the basis of the results, from...**

**5.2. ... multiple eligible outcome measurements (e.g. scales, definitions, time points) within the outcome domain?**

No specific comments

### **5.3 ... multiple eligible analyses of the data?**

No specific comments

## Overall risk of bias:

| Overall risk-of-bias judgement | Criteria                                                                                                                                                                                                                                         |
|--------------------------------|--------------------------------------------------------------------------------------------------------------------------------------------------------------------------------------------------------------------------------------------------|
| Low risk of bias               | The study is judged to be at <b>low risk of bias for all domains</b> for this result.                                                                                                                                                            |
| Some concerns                  | The study is judged to raise <b>some concerns</b> in at least one domain for this result, but not to be at high risk of bias for any domain.                                                                                                     |
| High risk of bias              | The study is judged to be at <b>high risk of bias</b> in at least one domain for this result.<br>Or<br>The study is judged to have <b>some concerns</b> for <b>multiple domains</b> in a way that substantially lowers confidence in the result. |

For multi-arm-studies (i.e. with several comparisons), for each domain, we used the average of the different comparisons, for the rating of the study. In case of intermediate averages between two categories (e.g. between “high risk” and “some concerns”), we conservatively used the more severe rating (here “high risk”).

We judged a study at overall high risk of bias when at least 1 domain was rated at “high risk” or when 4 or more domains were rated as “some concerns”.

## References

1. Sterne JAC, Savović J, Page MJ, Elbers RG, Blencowe NS, Boutron I, Cates CJ, Cheng HY, Corbett MS, Eldridge SM, Emberson JR, Hernán MA, Hopewell S, Hróbjartsson A, Junqueira DR, Jüni P, Kirkham JJ, Lasserson T, Li T, McAleenan A, Reeves BC, Shepperd S, Shrier I, Stewart LA, Tilling K, White IR, Whiting PF, Higgins JPT. RoB 2: a revised tool for assessing risk of bias in randomised trials. *BMJ*. 2019 Aug 28;366:l4898. doi: 10.1136/bmj.l4898. PMID: 31462531.
2. Higgins JPT, Thomas J, Chandler J, Cumpston M, Li T, Page MJ, Welch VAe: *Cochrane Handbook for Systematic Reviews of Interventions* version 6.1 (updated September 2020). Cochrane; 2019
3. Jun Xia, Clive Adams, Nishant Bhagat, Vinaya Bhagat, Paranthaman Bhoopathi, Hany El-Sayeh, Vanessa Pinfold and Yahya Takriti. Losing participants before the trial ends erodes credibility of Findings *Psychiatric Bulletin* 2009, 33:254-257.
4. Sackett, David L. (1998): *Evidence-based medicine. How to practice and teach EBM*. 7. print. N.Y.: Churchill Livingstone.

## **eAppendix 4. Individual drugs and Additional sensitivity/subgroup analyses**

# Aripiprazole oral and long-acting injectable pooled

**Relapse  
(5 studies, 11 dose arms)**

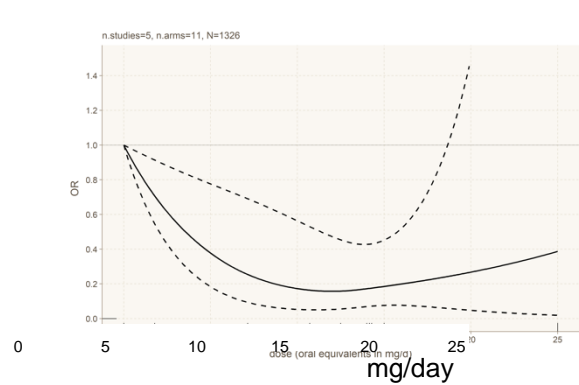

Available studies: Pigott 2003, McEvoy 2007b\_extension, Kane 2012, Fleischhacker 2014, Mallikaarjun 2013)

**Overall symptoms  
(5 studies, 11 dose arms)**

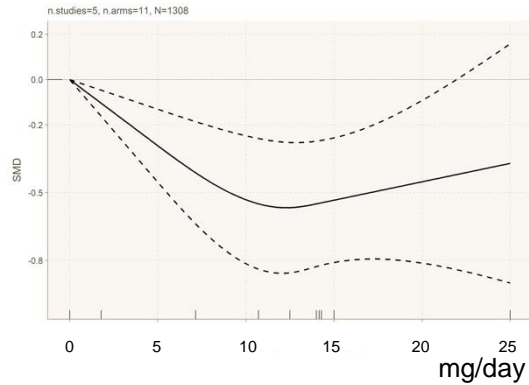

Available studies: Pigott 2003, McEvoy 2007b\_extension, Kane 2012, Fleischhacker 2014, Mallikaarjun 2013

**Rehospitalisation  
(2 studies, 4 dose arms)**

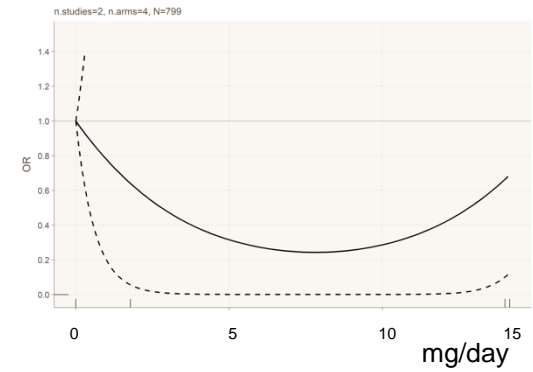

Available studies: Kane 2012, Fleischhacker 2014

**All cause discontinuation (4 studies, 9 dose arms)**

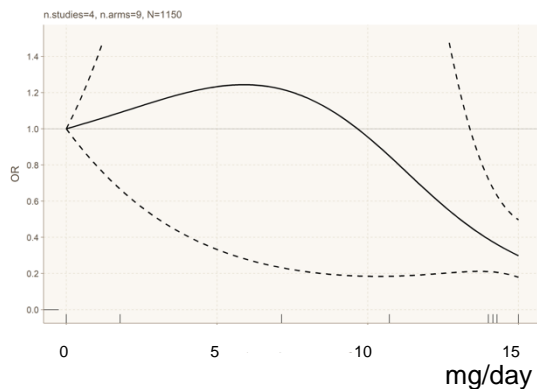

Available studies: Pigott 2003, Kane 2012, Fleischhacker 2014, Mallikaarjun 2013

**Dropouts due to side-effects  
(5 studies, 11 dose arms)**

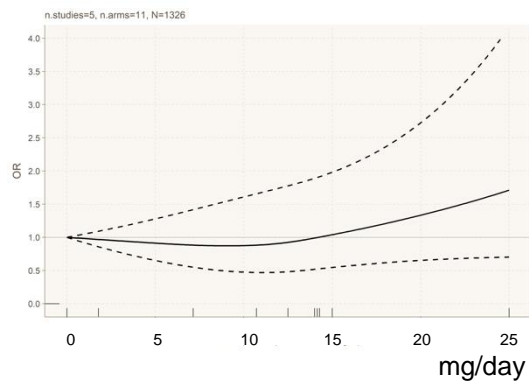

Available studies: Pigott 2003, McEvoy 2007b\_extension, Kane 2012, Fleischhacker 2014, Mallikaarjun 2013)

Footnote for all figures: The marks on the x-axis indicate the available dose arms. OR = odds ratio, SMD = standardized mean difference

## Aripiprazole oral separately

2 studies, 4 dose arms

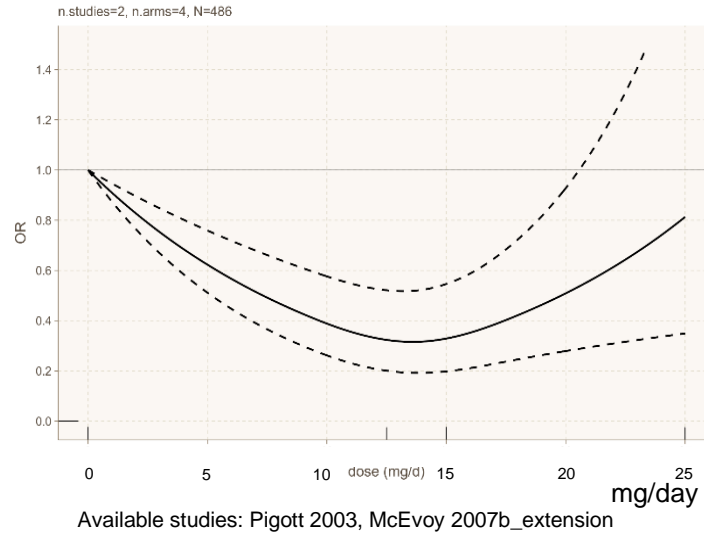

## Aripiprazole LAI separately

3 studies, 7 dose arms

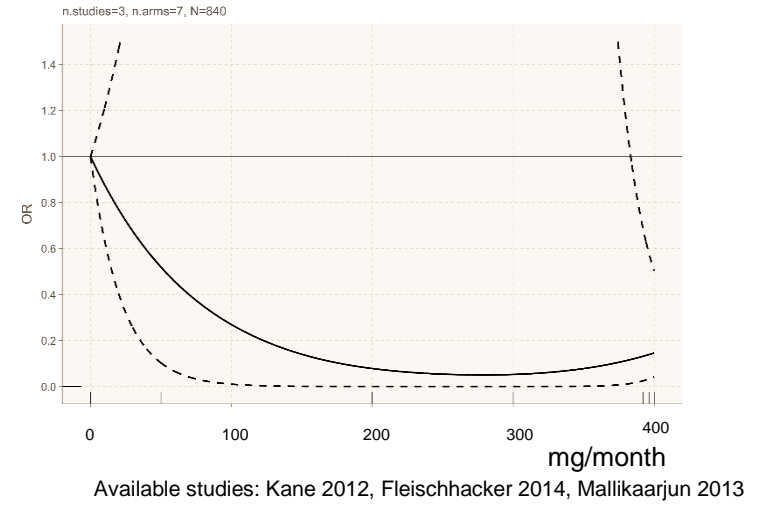

Relapse

2 studies, 4 dose arms

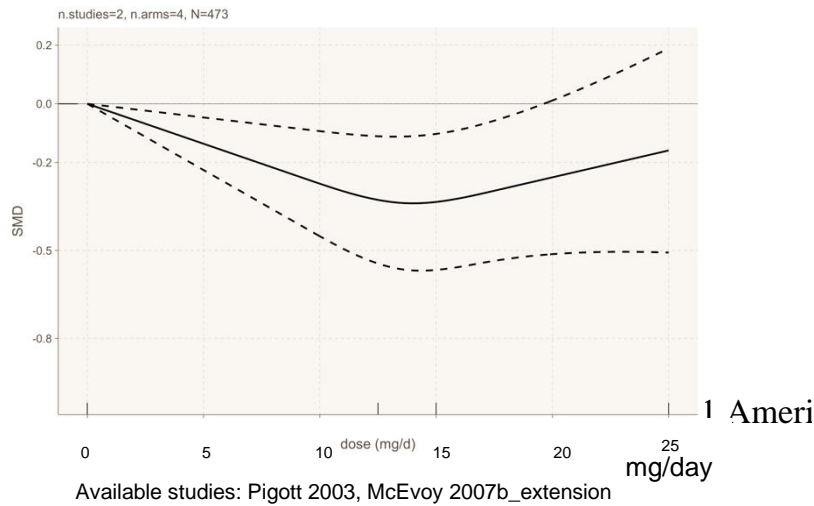

3 studies, 7 dose arms

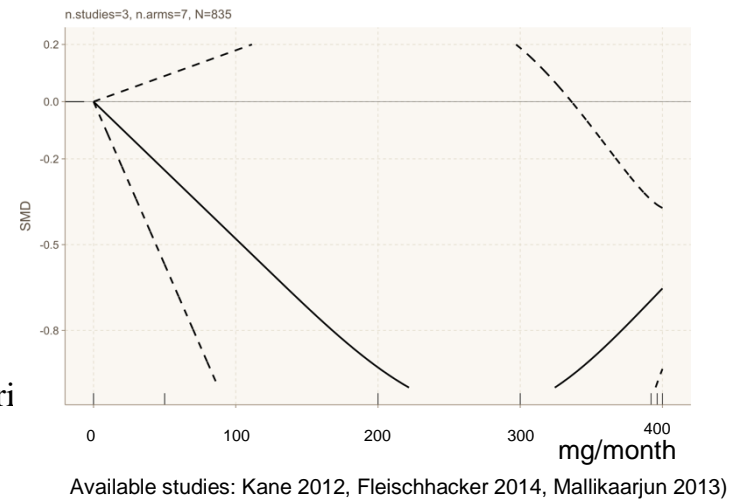

Overall symptoms



## **Description of the aripiprazole results**

### First slide, oral and long-acting injectable pooled

Five studies with 11 individual dose arms were available, two on oral aripiprazole (Pigott 2003, McEvoy 2007b\_extension), three on aripiprazole long-acting injectable (LAI), all of which used the “maintena” formulation originally developed by Otsuka and BristolMyersSquibb (Kane 2012, Fleischhacker 2014, Mallikaarjun 2013). Long-acting injectable doses were converted to daily doses. The dose response curve was flat at approximately 12.5mg/day for relapse (5 studies) and overall symptoms (5 studies). For rehospitalisation it flattened earlier, but this result was based on only 2 studies. 12.5mg/day is similar to the near-to-maximum dose found for acute treatment (Leucht S, Crippa A, Sifis S, Patel MX, Orsini N, Davis JM. Dose-Response Meta-Analysis of Antipsychotic Drugs for Acute Schizophrenia. Am J Psychiatry. 2020 Apr 1;177(4):342-353). The all-cause discontinuation slope showed an initial increase (i.e. aripiprazole worse) and then a decrease (i.e. aripiprazole better). This is plausible in the sense that most dropouts are due to inefficacy.

### Second slide, oral and long-acting injectable separately

The second aripiprazole slide shows that the results for were similar when aripiprazole oral (plateau ~12.5mg/day) and aripiprazole LAI (plateau ~ 270mg monthly  $\pm$  10mg/day) were analysed separately. Only relapse and overall symptoms were analyzed, because data on other outcomes were scarce.

# Fluphenazine long-acting injectable

**Relapse  
(6 studies, 13 dose arms)**

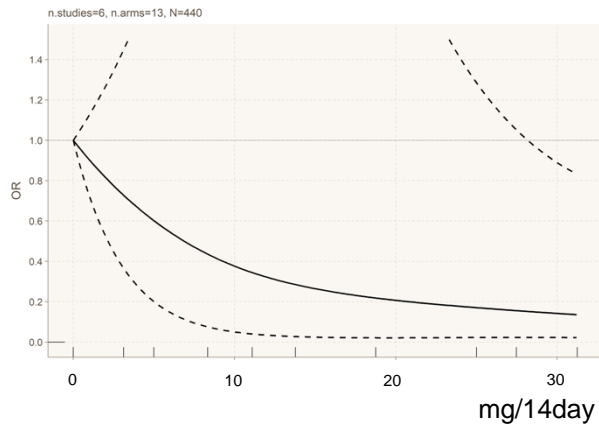

Available studies: Carpenter 1999, Dotti 1979, Kane 1979, Kane 1983, Marder 1984, Schooler 1993

**Rehospitalisation  
(4 studies, 9 dose arms)**

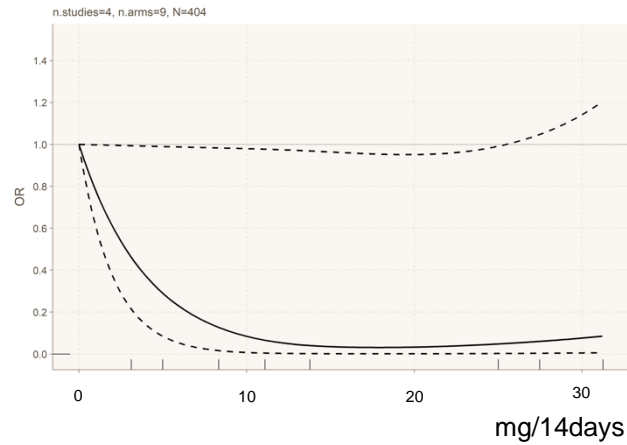

Available studies: Carpenter 1999, Kane 1983, Marder 1984, Schooler 1993

**Overall symptoms  
(2 studies, 4 dose arms)**

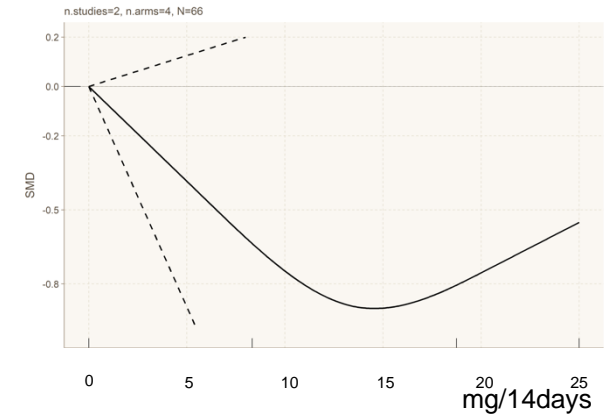

Available studies: Carpenter 1999, Dotti 1979

**All cause discontinuation (5 studies, 11 dose arms)**

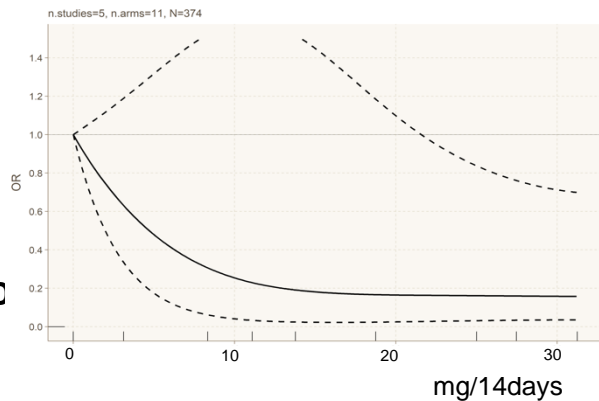

Available studies: Carpenter 1999, Dotti 1979, Kane 1979, Kane 1983, Schooler 1993

**Dropouts due to side-effects  
(no study)**

**D**

**ng injectable results**

Six studies with 13 individual dose arms were available (Carpenter 1999, Dotti 1979, Kane 1979, Kane 1983, Marder 1984, Schooler 1993), all using long-acting injectable formulations which were converted to biweekly doses. The dose-response curve for relapse does not show a clear plateau. However, the dose-response curves for rehospitalization and all-cause discontinuation were essentially flat at 15mg biweekly. The curve for overall symptoms is difficult to interpret, because only 2 studies reported this outcome and confidence intervals were extremely wide, but it also suggests that 15mg/biweekly is the plateau dose. No study provided data on dropouts due to adverse events/side-effects.

## Haloperidol oral and long-acting injectable pooled

**Relapse  
(6 studies, 16 arms)**

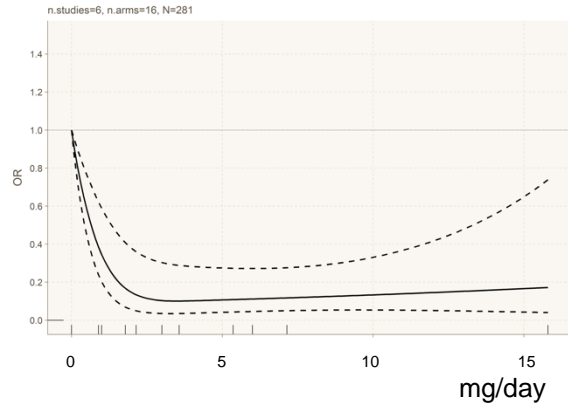

Available studies: Beasley 1996\_extension, Eklund 1991, Huttunen 1996, Kane 2002, Nishikawa 1982, Nishikawa 1984

**Rehospitalisation  
(2 studies, 4 arms)**

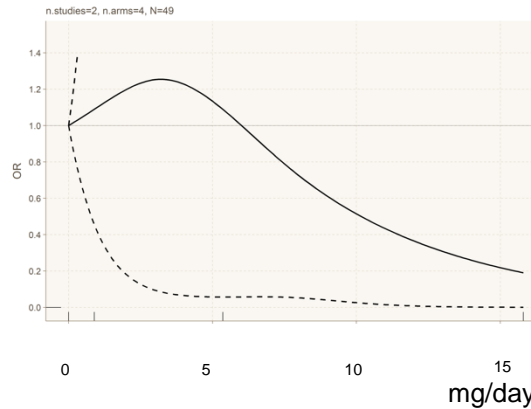

Available studies: Beasley 1996\_extension, Huttunen 1996

**Overall symptoms (2 studies, 4 arms)**

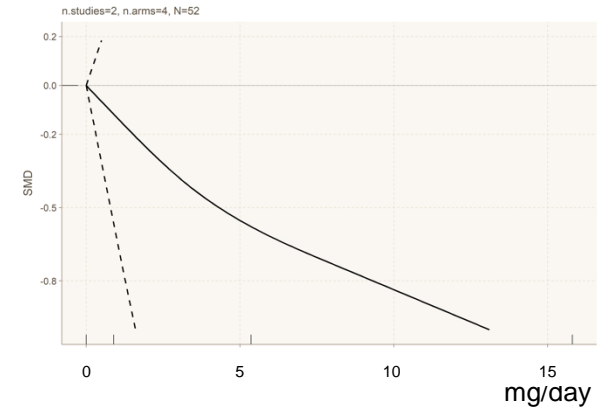

Available studies: Beasley 1996\_extension, Huttunen 1996

**All cause discontinuation (5 studies, 14 arms)**

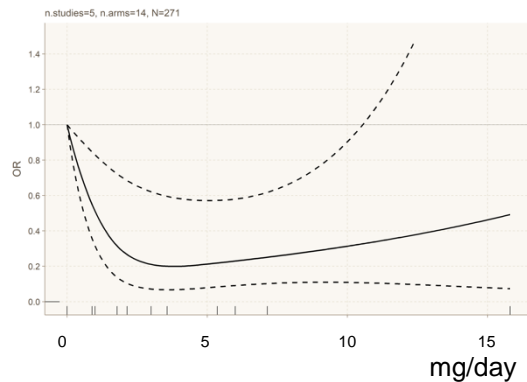

Available studies: Beasley 1996\_extension, Eklund 1991, Huttunen 1996, Kane 2002, Nishikawa 1984

**Dropouts due to side-effects (5 studies, 14 arms)**

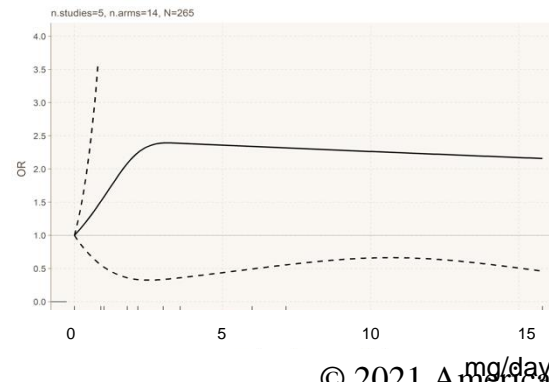

Available studies: Beasley 1996\_extension, Eklund 1991, Kane 2002, Nishikawa 1982, Nishikawa 1984

**Relapse - haloperidol oral  
(3 studies, 8 arms)**

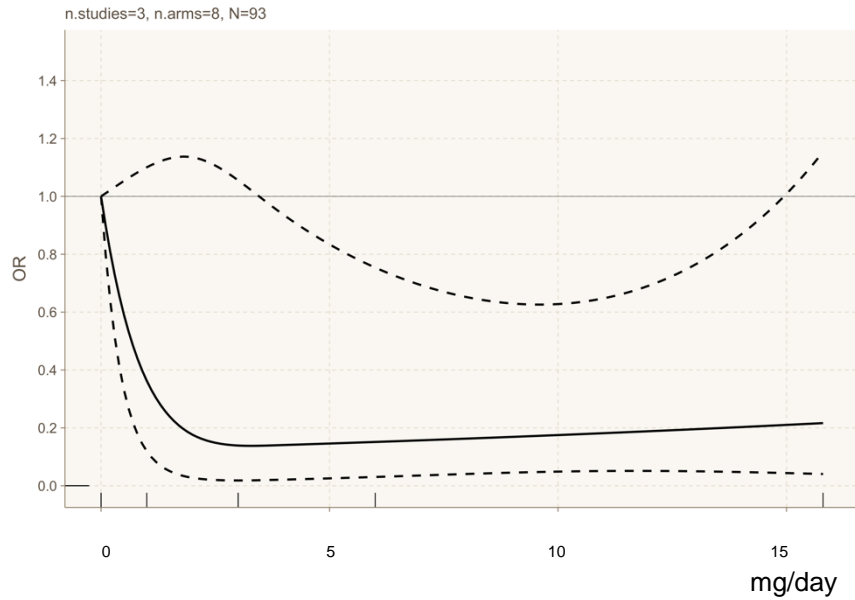

Available studies: Beasley 1996\_extension, Nishikawa 1982, Nishikawa 1984

**Relapse - haloperidol long-acting  
injectable  
(3 studies, 8 arms)**

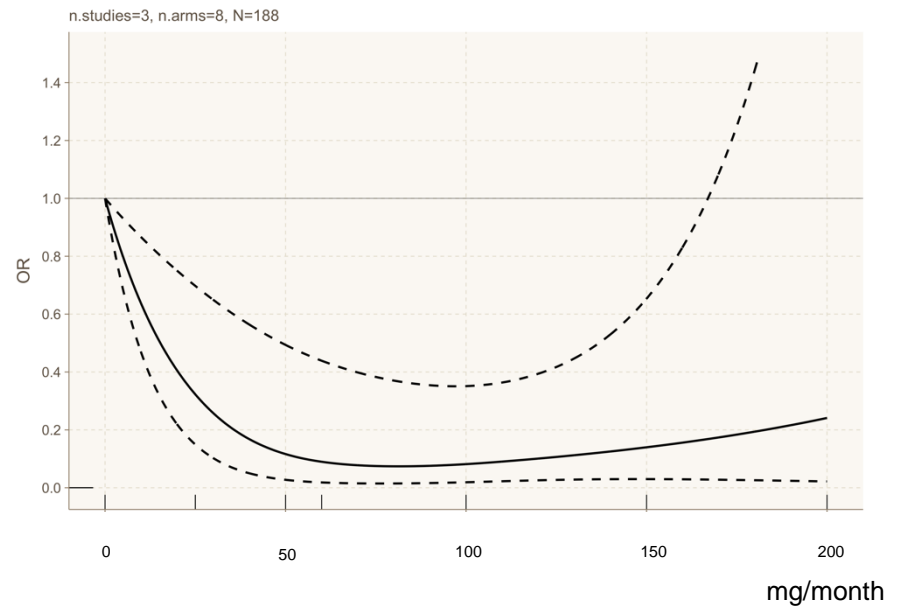

Available studies: Eklund 1991, Huttunen 1996, Kane 2002

Footnote for all figures: The marks on the x-axis indicate the available dose arms. OR = odds ratio, SMD = standardized mean difference.

## **Description of the haloperidol results**

### First slide, oral and long-acting injectable pooled

Six studies were available, three on long-acting injectable haloperidol (Kane 2002, Huttunen 1996, Eklund 1991) and three on oral haloperidol (Nishikawa 1982, Nishikawa 1984, Beasley 1996). Long-acting injectable doses were converted to daily doses. The dose-response curves for relapse and all-cause discontinuation plateaued at approximately 3mg/day for relapse, but slightly increased thereafter for all-cause discontinuation. For overall efficacy and rehospitalisation only 2 studies were available making the data uninterpretable. Dropouts due to adverse events were higher in the haloperidol groups than in the placebo groups already at low doses and plateaued at approximately 3mg/day. The large confidence intervals needs to be considered.

### Second slide, oral and long-acting injectable separately

Separate analyses of oral (plateau ~ 3mg/day) and long-acting injectable formulations (plateau ~75mg monthly  $\cong$  2.7mg/day) on the second haloperidol slide showed consistent results. We only analysed relapse, because for the other efficacy outcomes overall symptoms and rehospitalisation only two studies were available

# Olanzapine – oral and long-acting injectable pooled

**Relapse  
(3 studies, 12 dose arms)**

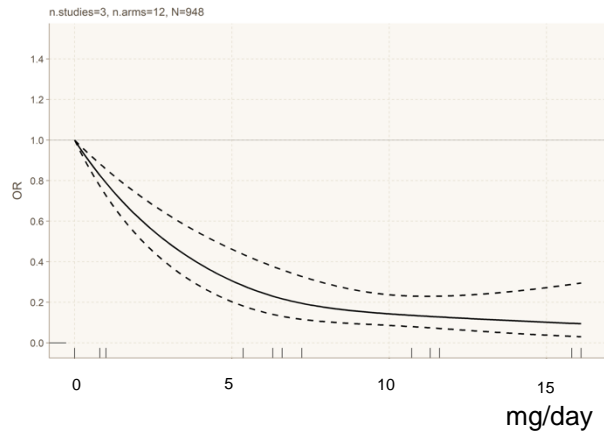

Available studies: Kane 2010, Beasley 1996, Beasley 1997

**Rehospitalisation  
(3 studies, 12 dose arms)**

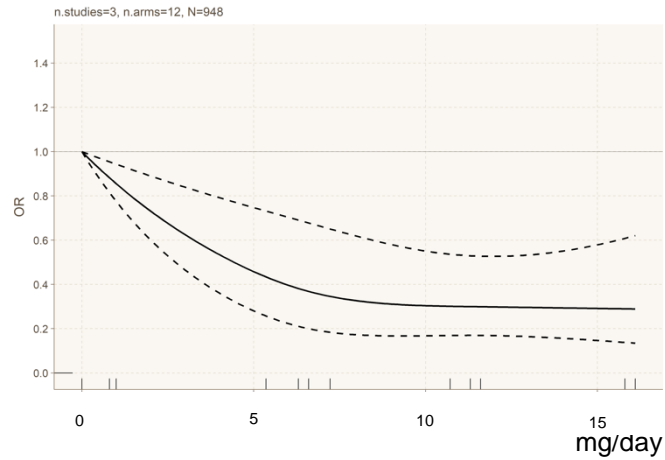

Available studies: Kane 2010, Beasley 1996, Beasley 1997

**Overall symptoms  
(3 studies, 12 dose arms)**

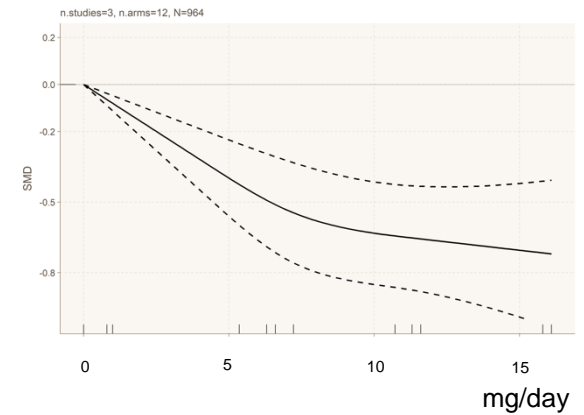

Available studies: Kane 2010, Beasley 1996, Beasley 1997

**All cause discontinuation (3  
studies, 12 dose arms)**

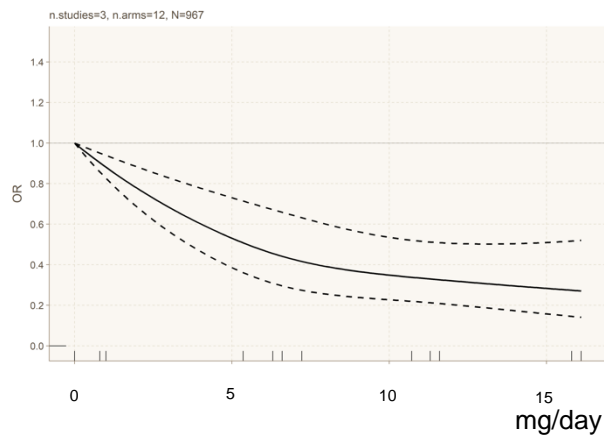

**Dropouts due to side-effects  
(3 studies, 12 dose arms)**

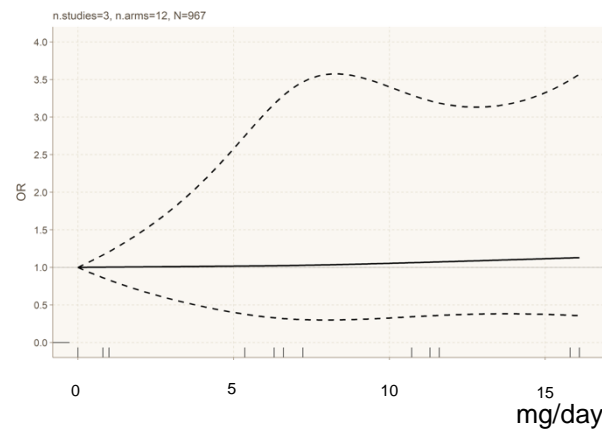

Medical Association. All rights reserved. 71

# Olanzapine – oral and long-acting injectable studies separately

**Oral (2 studies, Beasley 1996, 1997)**

**Long-acting injectable (1 study, Kane 2010)**

**Relapse**

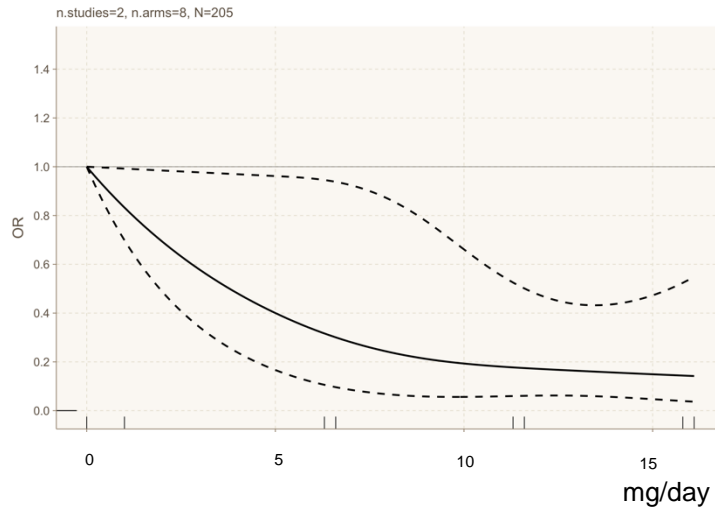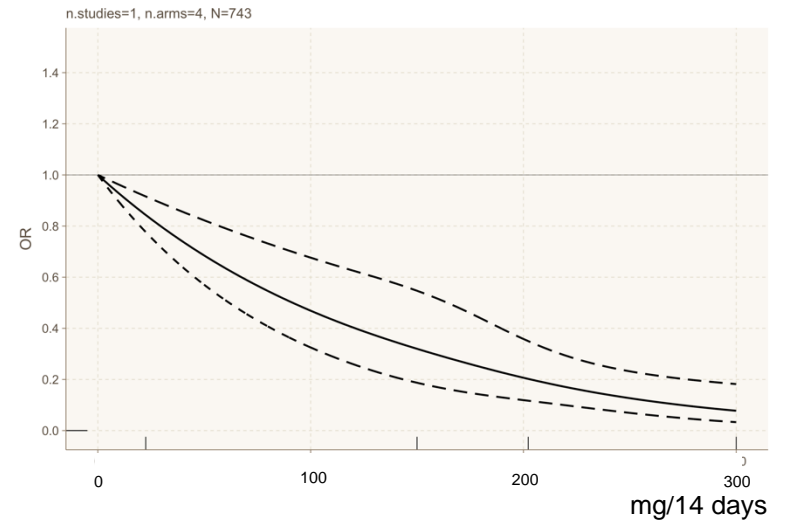

**Overall symptoms**

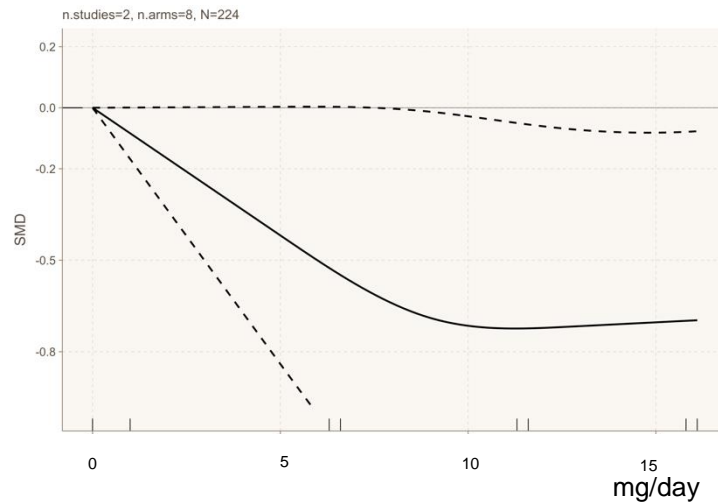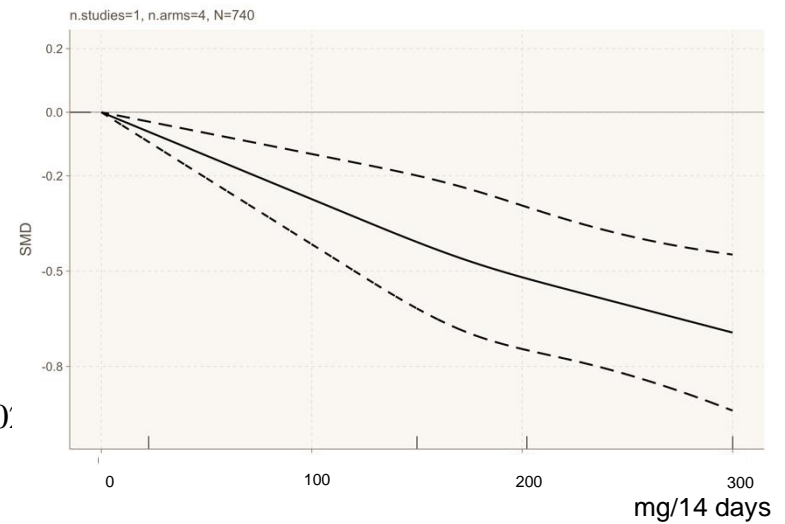

© 20.

72

Footnote for all figures: The marks on the x-axis indicate the available dose arms. OR = odds ratio, SMD = standardized mean difference



**Description of the olanzapine results:** Three studies with 12 individual dose arms were available, one on olanzapine long-acting injectable (Kane 2010) and two on oral olanzapine (Beasley 1996 and Beasley 1997). The dose response curve for relapse, rehospitalisation and overall symptoms and all-cause discontinuation seemed to be flat at around 10mg/day, although they still go slightly down up to the maximum examined dose of 20mg/day, in particular for overall symptoms.

A possible explanation for this phenomenon is that **the two oral studies were “continuation”** studies. This means that acute phase responders (here defined as at least 40% PANSS/BPRS reduction from baseline and outpatient at week 6) were followed up without an additional randomisation. In these studies the efficacy curves flattened at approximately 10mg/day. However, this design has a potential bias in favour of placebo / 1mg/day olanzapine, because it may “corrupt” randomization. Probably only special patients may have shown such a strong response in the acute phase. Thus, the patients in the placebo / 1 mg olanzapine group may differ from those in the other groups.

In contrast, the study **on long-acting injectable olanzapine** by Kane et al. 2010 patients who were stabilized on oral olanzapine were randomized to the various long-acting injectable doses. This study showed no clear efficacy plateau at the highest dose of 300mg biweekly which approximately corresponds to 20mg per day.

The results for oral and long-acting injectable separately are shown on the next page (the results for rehospitalization were similar and can be sent upon request).

# Paliperidone long-acting injectable

**Relapse  
(1 study, 3 dose arms)**

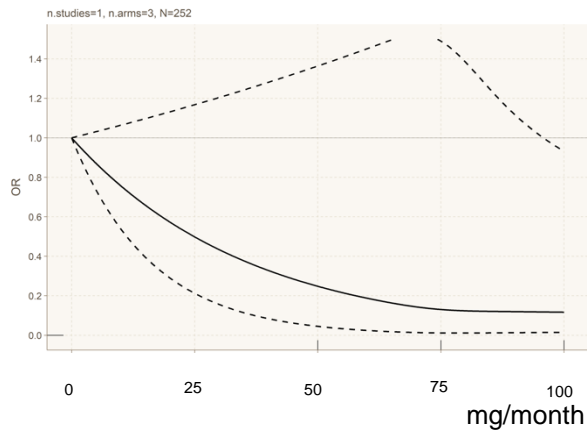

Available studies: Hough 2009

**Overall symptoms  
(1 study, 3 dose arms)**

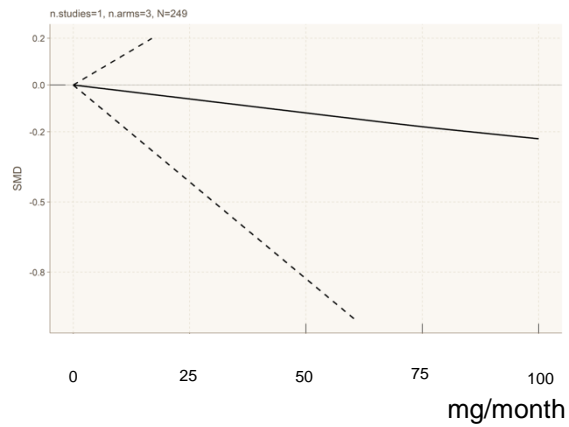

Hough 2009

**All cause discontinuation (1  
study, 3 dose arms)**

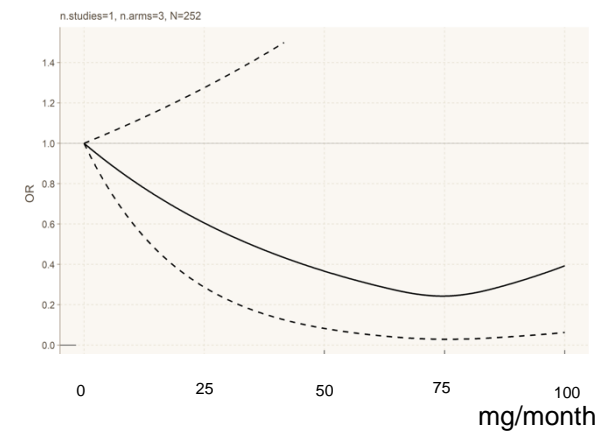

Hough 2009

**Rehospitalisation (no  
study)**

**Dropouts due to adverse events  
(no study)**

### **Description of the paliperidone long-acting injectable results**

One study with three dose arms was available (Hough 2009). The curves for relapse, and all-cause discontinuation flattened at approximately 75mg/four weekly, while the overall symptom curves shows a gradually increasing efficacy up to the maximum examined dose of 100mg/month. **The data are uninterpretable for clinical practice, because the maximum licensed dose of 150mg/month was not included in the single study available.** Moreover, the enormous uncertainty due to the paucity of data expressed by very wide confidence intervals must be considered.

# Quetiapine immediate release

**Relapse  
(2 studies, 5 dose arms)**

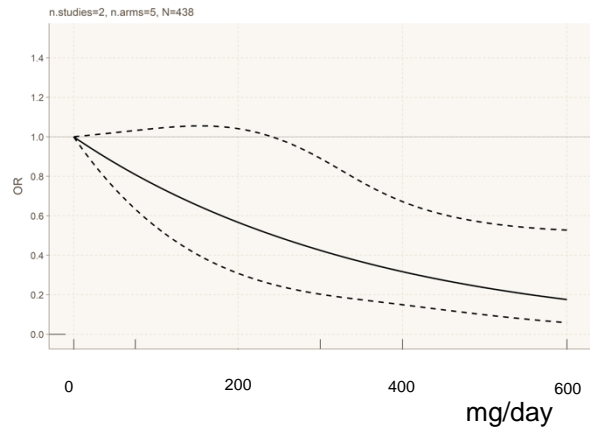

Available studies: Arvanitis 1993, Chen 2010

**Rehospitalisation  
(2 studies, 5 dose arms)**

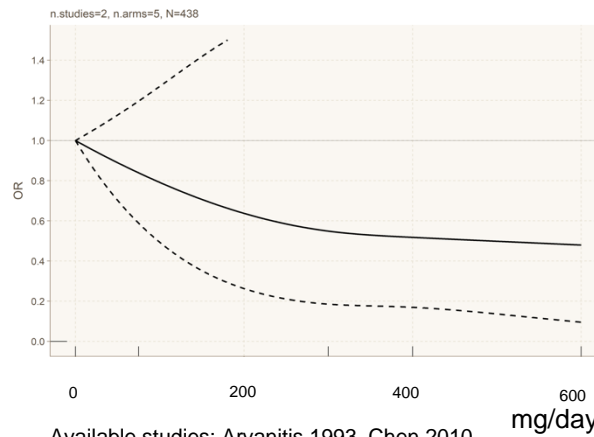

Available studies: Arvanitis 1993, Chen 2010

**Overall symptoms  
(0 studies)**

**All cause discontinuation (2  
studies, 5 dose arms)**

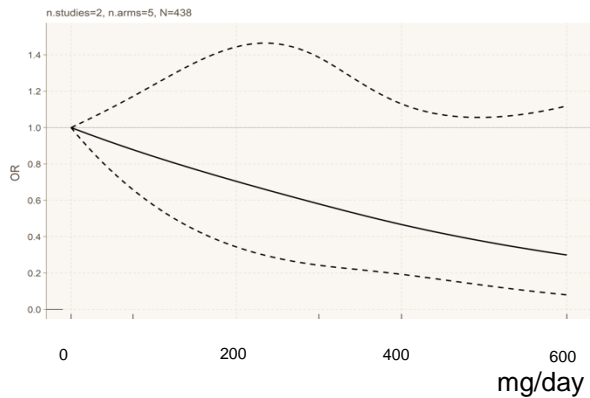

Available studies: Arvanitis 1993, Chen 2010

**Dropouts due to side-effects  
(2 studies, 5 dose arms)**

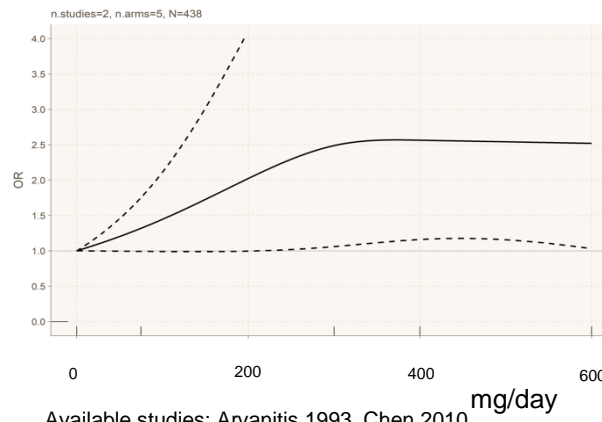

Available studies: Arvanitis 1993, Chen 2010

### **Description of the quetiapine results**

Two quetiapine immediate release studies (Arvanitis 1993, an unpublished study for which we identified relapse data in a report sent to the FDA; and Chen 2010 which was a first-episode study) were included. They 75mg/day, 300mg/day, 400mg/day (Chen 2010), 600mg/day and placebo. They showed increasing effectiveness in terms of relapse prevention and all-cause discontinuation up to 600mg/day, the maximum dose tested. **It seems that a plateau was not yet reached.** The dose-response curve for rehospitalization remained stable from approximately 300mg/day upward. Data on overall efficacy were not available. Dropouts due to side-effects increased up to a dose of approximately 300mg/day. Data on quetiapine extended release were not available.

# Ziprasidone

**Relapse  
(1 study, 4 dose arms)**

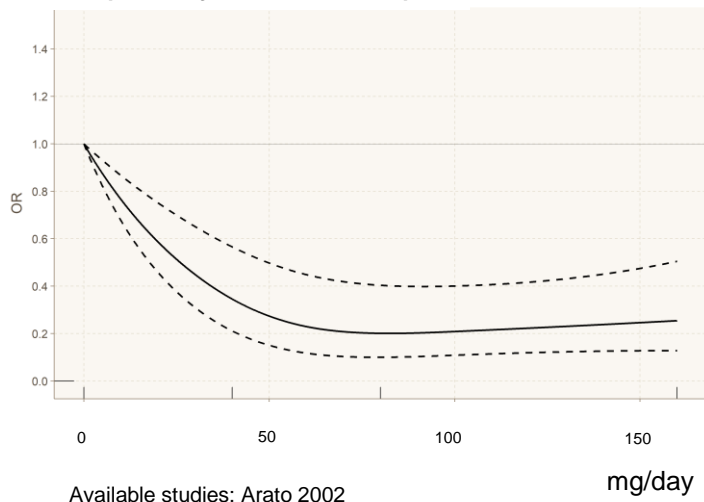

**Rehospitalisation (no study)**

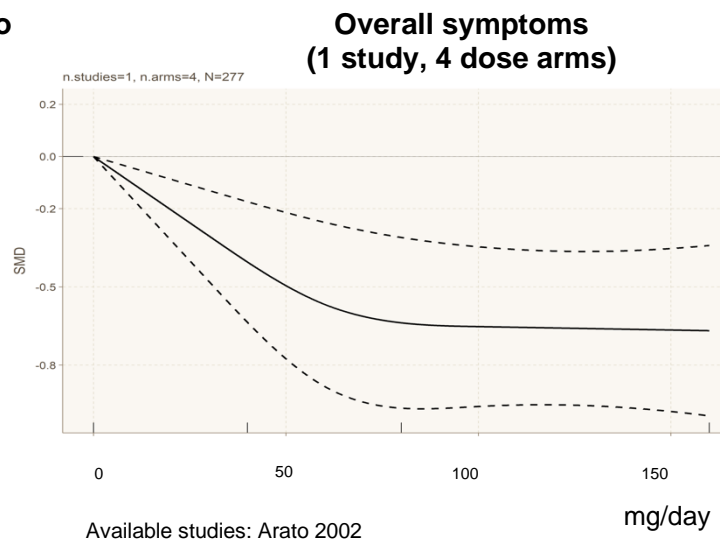

**Overall symptoms  
(1 study, 4 dose arms)**

**All cause discontinuation (1 study, 4 dose arms)**

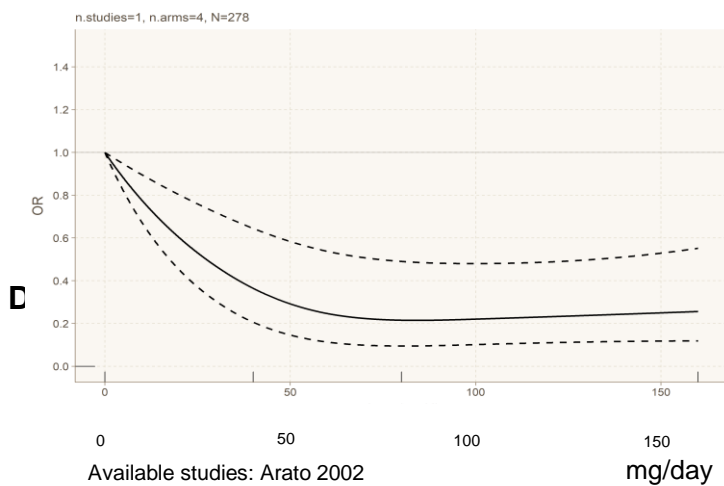

**Dropouts due to side-effects  
1 study, 4 dose arms**

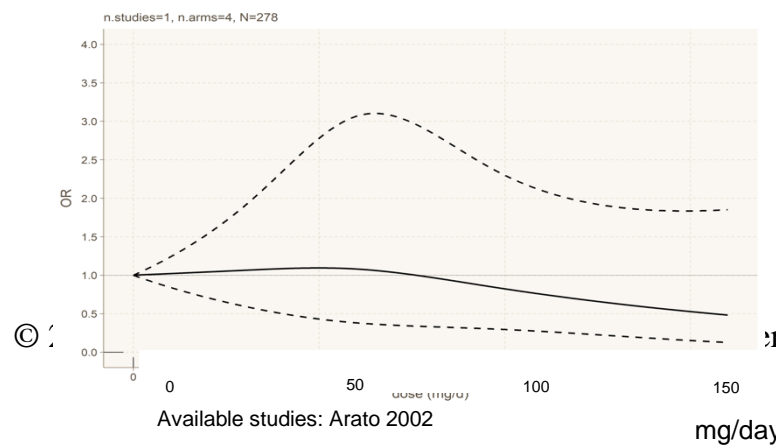

Footnote for all figures: The marks on the x-axis indicate the available dose arms. OR = odds ratio, SMD = standardized mean difference

One ziprasidone study with four individual dose arms (placebo, 40mg/day, 80mg/day and 160mg/day) was available (Arato 2002). A plateau was reached at approximately 75mg/day for relapse, overall symptoms and all-cause discontinuation. No data on rehospitalisation were available.

**Risperidone long-acting injectable**

Simpson 2006 compared two doses of risperidone consta, 50mg/14 days was somewhat more efficacious than 25mg/14 days. As dose-response meta-analysis requires at least 3 arms, such an analysis was not possible, but the study was included in the overall analyses across drugs.

**Lurasidone**

Tandon 2016 compared only a single lurasidone dose with placebo. Therefore, a separate dose-response meta-analysis was not possible for lurasidone. The study was, however, included in the overall analyses across drugs.

**Zotepine**

Cooper 2000 compared only a single zotepine dose with placebo. Therefore, a separate dose-response meta-analysis was not possible for zotepine. The study was, however, included in the overall analyses across drugs.



## **Additional sensitivity and subgroup analyses**

**Sensitivity analysis of the primary outcome relapse: Eight studies with high overall risk of bias excluded** (Beasley 1997\_Extension, Hough 2009, Kane 1983, Mallikaarjun 2013, Marder 1984, McEvoy 2007, Nishikawa 1984, Schooler 1993)

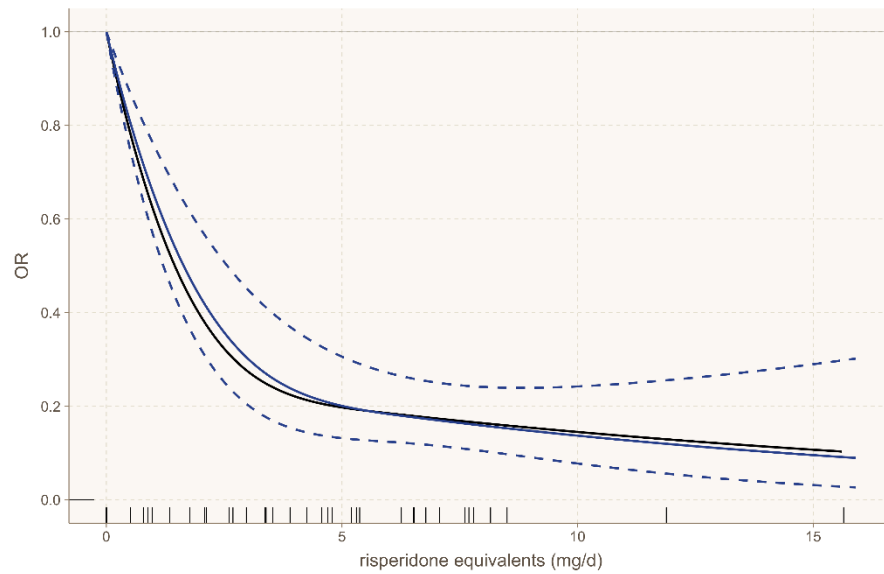

**Sensitivity analysis of the primary outcome relapse: Two non double-blind studies excluded** (Huttunen 1996, Mallikaarjun 2013)

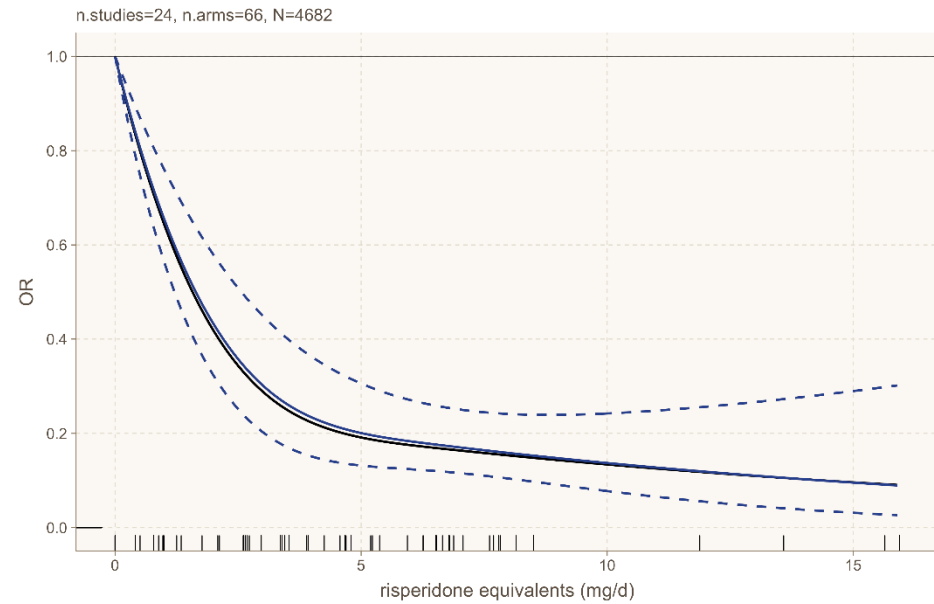

The results of both sensitivity analyses were virtually identical with those of the primary analysis

## Subgroup analysis of the outcome relapse: Median split of the mean age of the study population

The post-hoc subgroup analysis dividing the studies in two groups according to the median mean age (38.5 years) is shown below. There was no clear difference between the groups. The older group (red) bulged only slightly earlier, the confidence intervals overlapped broadly and the shape of the curves was similar. One reason may be that the median age in both groups was not very different ( $\geq$  median age group: median 41.6 years, <median age group: 35.3 years)

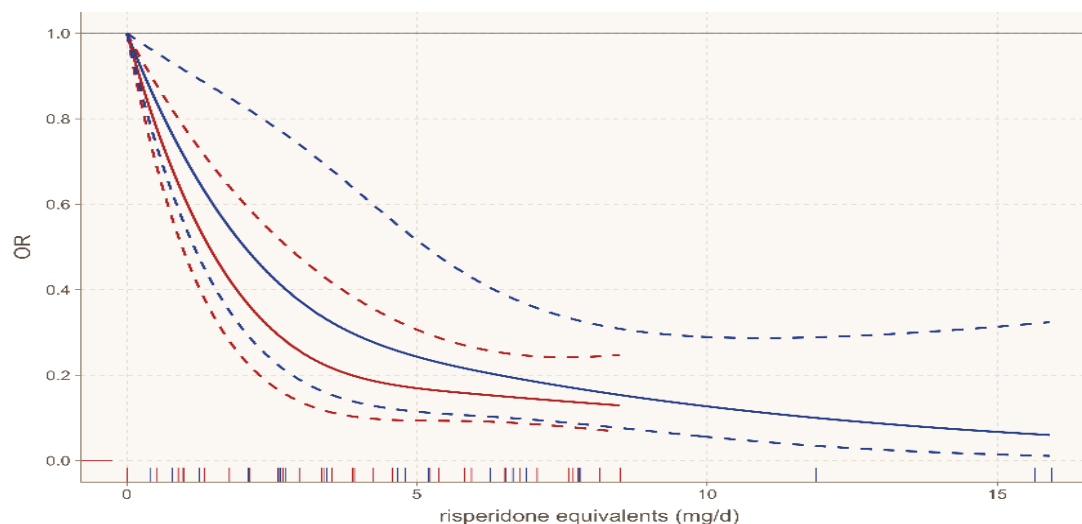

Mean age: median 38.5 years interquartile range (35.5;42.0)

Red: mean age  $\geq$  median: 13 studies, 36 arms, 3365 participants

Median mean age 41.6 IQR (39.5;43.6)

Studies: Arato 2002, Cooper 2000b, Eklund 1991, Fleischhacker 2014, Hough 2009, Kane 2002b, Kane 2010c, Kane 2012, Mallikaarjun 2013, Nishikawa 1984, Pigott 2003, Simpson 2006, Tandon 2016

Blue: mean age < median: 10 studies, 29 arms, 1162 participants

Median age 35.4 IQR (29.6;35.8)

Studies: Arvanitis 1993, Beasley 1996b\_Extension, Beasley 1997\_Extension, Carpenter 1999, Chen 2010, Kane 1979, Kane 1983, Marder 1984, Nishikawa 1982, Schooler 1993

## Subgroup analysis of the outcome relapse: Median split of the percentage men in the studies

The subgroup analysis dividing the studies in two groups according to the median of percentage male (67%) is shown below. The group with more men (red) bulged earlier (~3mg risperidone equ. per day). The result does not seem to be driven by age which was similar in both subgroups (38.2years versus 39 years). It is unexpected in the sense that one analysis suggested that women respond better than men in the acute phase<sup>1</sup>. We would therefore have expected that a lower dose might be sufficient for them. Moreover, two reviews did not find sex to be a predictor of relapse<sup>2,3</sup>. Moreover, this is a post-hoc analysis, the sample size is small, subgroup analyses are hypothesis generating only, and there maybe hidden moderators explaining this result.

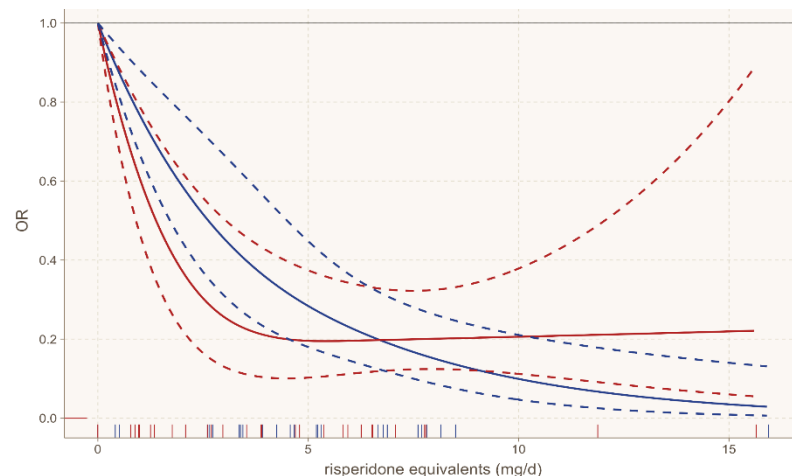

Percentage men: median 67% Interquartile range (60%;80%)

Red: Percentage male  $\geq$  median: 12 studies, 36 arms, 1150 participants

Median percentage male 80% IQR (71%;88%)

Age: Median 38.2 years IQR (35.4; 41.6)

Studies: Arato 2002, Arvanitis 1993, Beasley 1996b\_Extension, Carpenter 1999, Cooper 2000b, Dotti 1979, Kane 1979, Kane 2002b, Mallikaarjun 2013, Marder 1984, Nishikawa 1982, Nishikawa 1984

Blue: Percentage male < median: 12 studies, 31 arms, 3380 participants<sup>3,13-23</sup>

Median percentage male 60% IQR (58%;66%)

Age: Median 39.0 years IQR (35.8; 41.2)

Studies: Beasley 1997\_Extension, Chen 2010, Fleischhacker 2014, Hough 2009, Huttunen 1996, Kane 1983, Kane 2010c, Kane 2012, Pigott 2003, Schooler 1993, Simpson 2006, Tandon 2016

### References:

1. Rabinowitz J, Werbeloff N, Caers I, Mandel FS, Stauffer V, Ménard F, Kinon BJ, Kapur S. Determinants of antipsychotic response in schizophrenia: implications for practice and future clinical trials. *J Clin Psychiatry*. 2014 Apr;75(4):e308-16
2. Lecomte T, Potvin S, Samson C, et al. Predicting and preventing symptom onset and relapse in schizophrenia-A metareview of current empirical evidence. *J Abnorm Psychol*. 2019;128(8):840-854.
3. Alvarez-Jimenez M, Priede A, Hetrick SE, et al. Risk factors for relapse following treatment for first episode psychosis: a systematic review and meta-analysis of longitudinal studies.

## eAppendix 5. Conversion to absolute rates, relative risks and PANSS units

### Conversion of ORs and SMDs

#### Formulas for the conversion

The conversions were conducted according to the formulas in the Cochrane Handbook:<sup>1</sup>

#### 1. ORs to absolute rates and RRs

The conversion of ORs to absolute rates and RRs requires an assumed control risk (ACR). As ACR, we used the meta-analytic point estimate of event rates in the placebo group (for the outcomes relapse, re-hospitalization, dropouts due to any cause, dropouts due to any reason).

Then, we transformed ORs using the equations:

- From OR to RR:  $RR = \frac{OR}{(1-ACR*(1-OR))}$
- From OR to absolute rates:  $Absolute\ rate = ACR * \frac{OR}{(1-ACR*(1-OR))}$

The same formulas were used to transform the lower and upper boundaries of the 95% confidence intervals.

#### 2. SMDs to absolute PANSS change scores

The conversion of SMD to absolute PANSS scores require a) a standard deviation of the scale, for which the weighted average of SD of PANSS change scores was used: 16.47 (median 19.47 IQR [11.56-30.46]); and b) the absolute PANSS change score in the placebo group (PANSS at 0 mg), for which we used the meta-analytic point estimate of change in the placebo group.

Then, we transformed SMDs using the equation:  $PANSS\ change\ scores\ (dose) = PANSS\ change\ score\ (0\ mg) + SMD * SD$

#### Estimating event rates and PANSS change scores in placebo groups

#### 1. Relapse

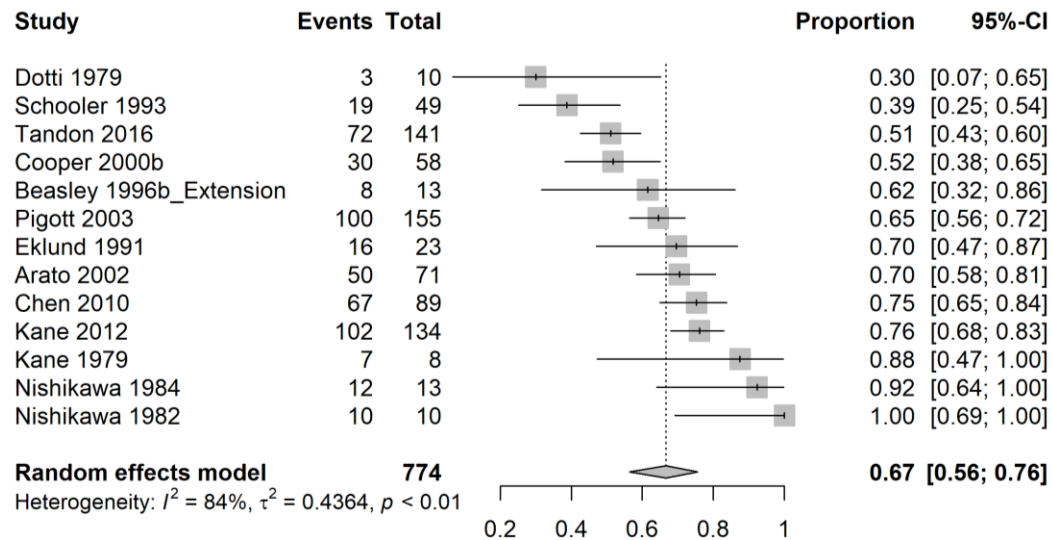

On average, about 67% of the participants in the placebo group relapsed, and ACR was set at 67%.

## 2. Re-hospitalization

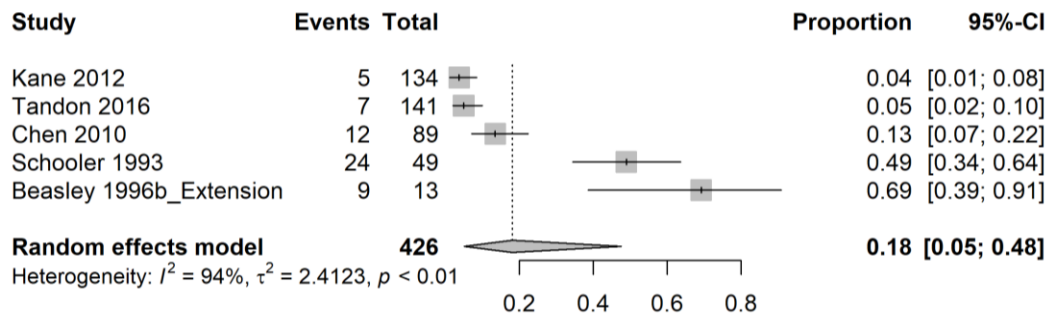

On average, about 18% of the participants in the placebo group had a re-hospitalization, and ACR was set at 18%.

### 3. Dropouts due to any reason

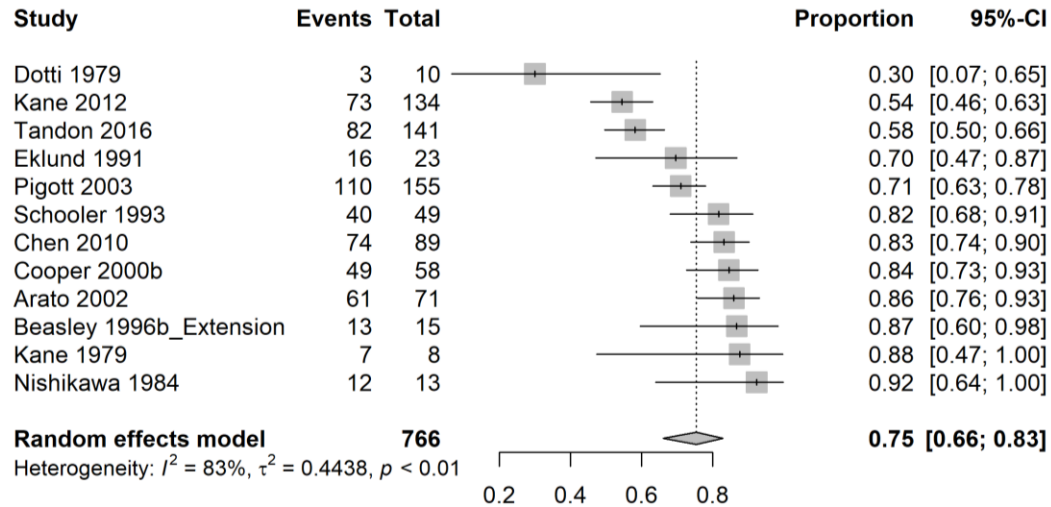

On average, about 75% of the participants in the placebo group dropped out due to any reason, and ACR was set at 75%.

### 4. Dropouts due to side effects

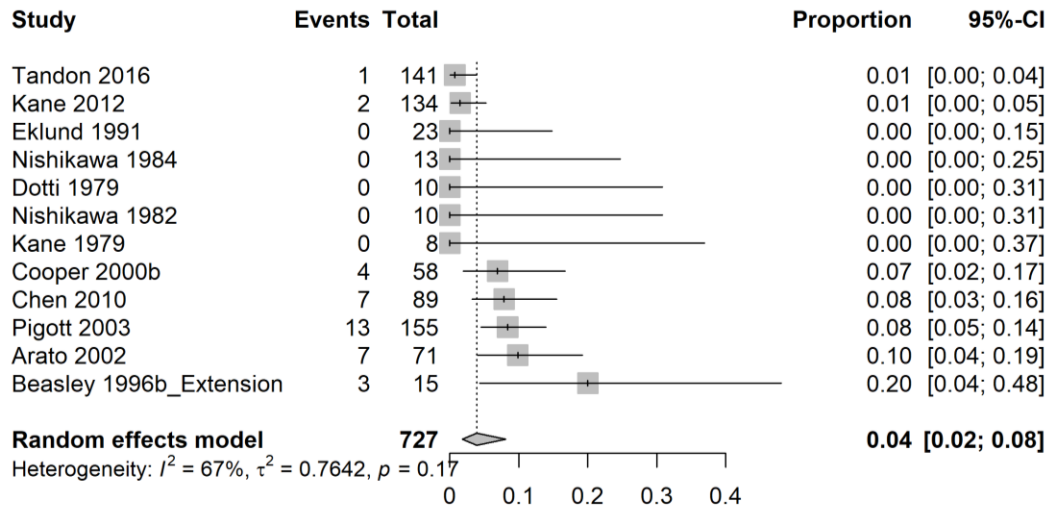

On average, about 4% of the participants in the placebo group dropped out due to side effects, and ACR was set at 4%.

### 5. Overall symptoms

First, we pooled original PANSS change scores from baseline to endpoint in the placebo group:



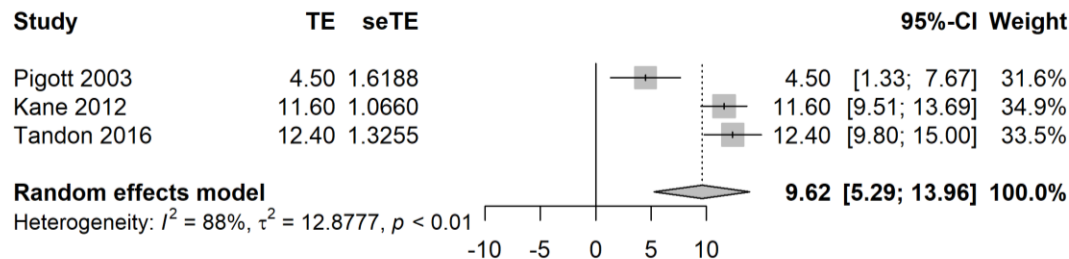

Three out of the seven placebo-controlled studies with data for overall symptoms reported original PANSS change scores. On average, there was a 9.62 increase of PANSS scores from baseline to endpoint in placebo groups.

Since the other four studies reported PANSS endpoint scores or BPRS scores, we further evaluated the robustness of the above meta-analysis. First, we transformed other measures to PANSS mean change scores:

- PANSS mean endpoint to PANSS mean change scores (change score = endpoint – baseline scores). The same was applied when BPRS endpoint scores were reported.
- BPRS mean change scores to PANSS mean change scores according to an equipercentile linking method<sup>2</sup>

The weighted average of PANSS change scores (original or transformed) was 8.9 (median 4.5 IQR [1.75-15.6]), which is in line with the meta-analysis of original data. A meta-analysis of original or transformed data was avoided, since further assumptions for the calculation of their standard deviations were required.

## References

1. Higgins JP, Thomas J, Chandler J, Cumpston M, Page MJ, Welch VA. Cochrane Handbook for Systematic Reviews of Interventions version 6.0; 2019.
2. Leucht S, Rothe P, Davis JM, Engel RR. Equipercentile linking of the BPRS and the PANSS. *Eur Neuropsychopharmacol* 2013; **23**(8): 956-9.

## **eAppendix 6. Heterogeneity and small-trial / publication bias**

## eAppendix 6\_Variation-Partition-Coefficients – Relapse (primary outcome)

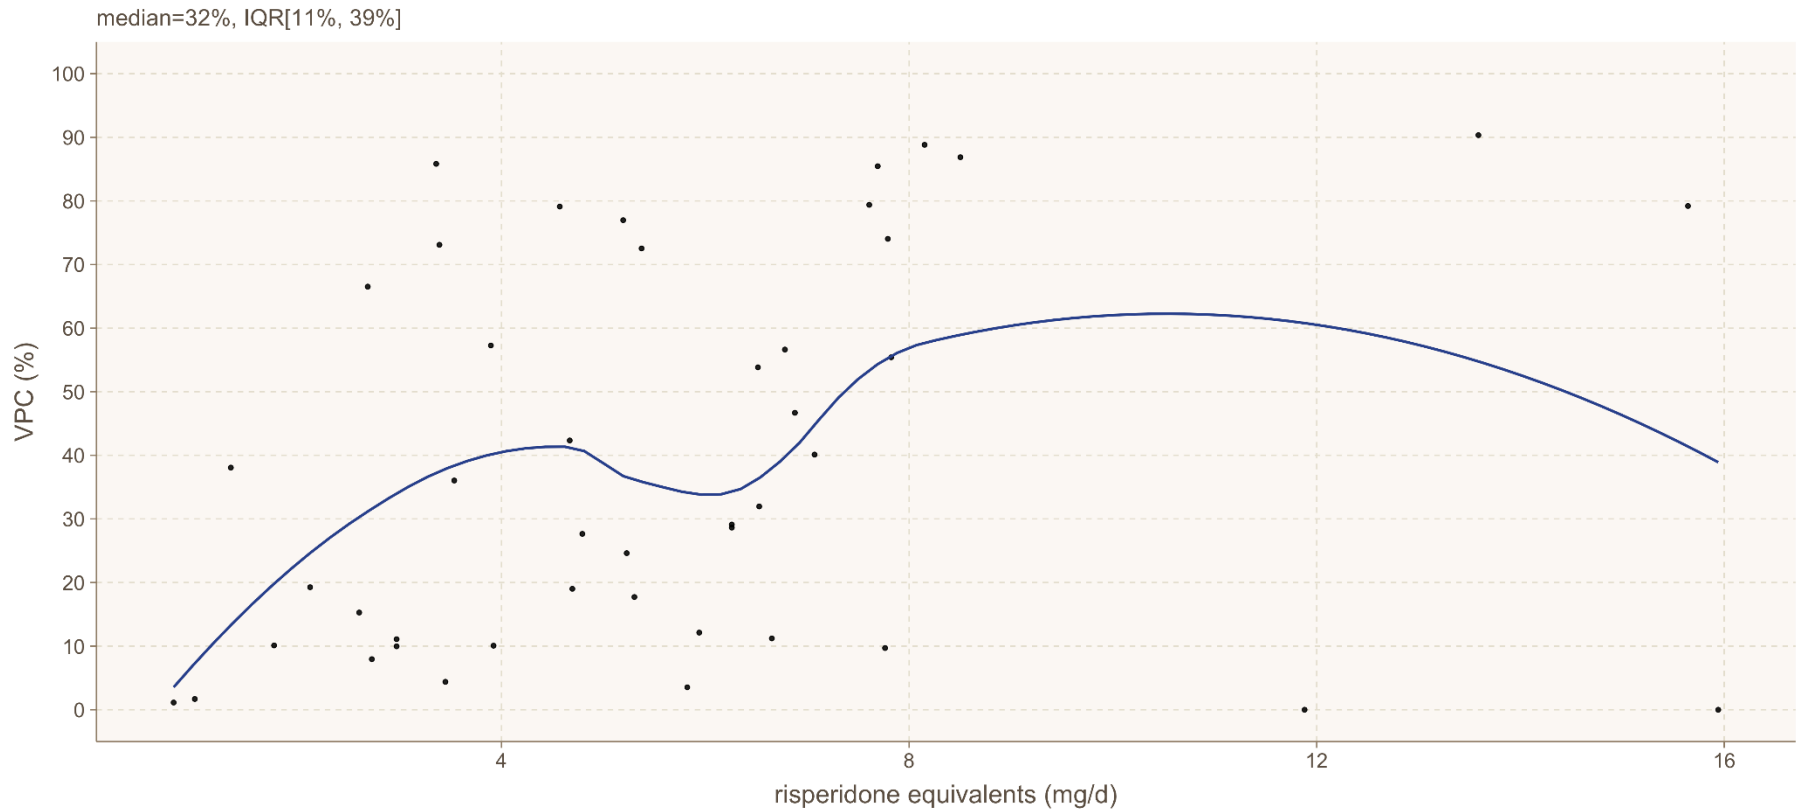

## eAppendix 6\_Variation-Partition-Coefficients – All-cause discontinuation

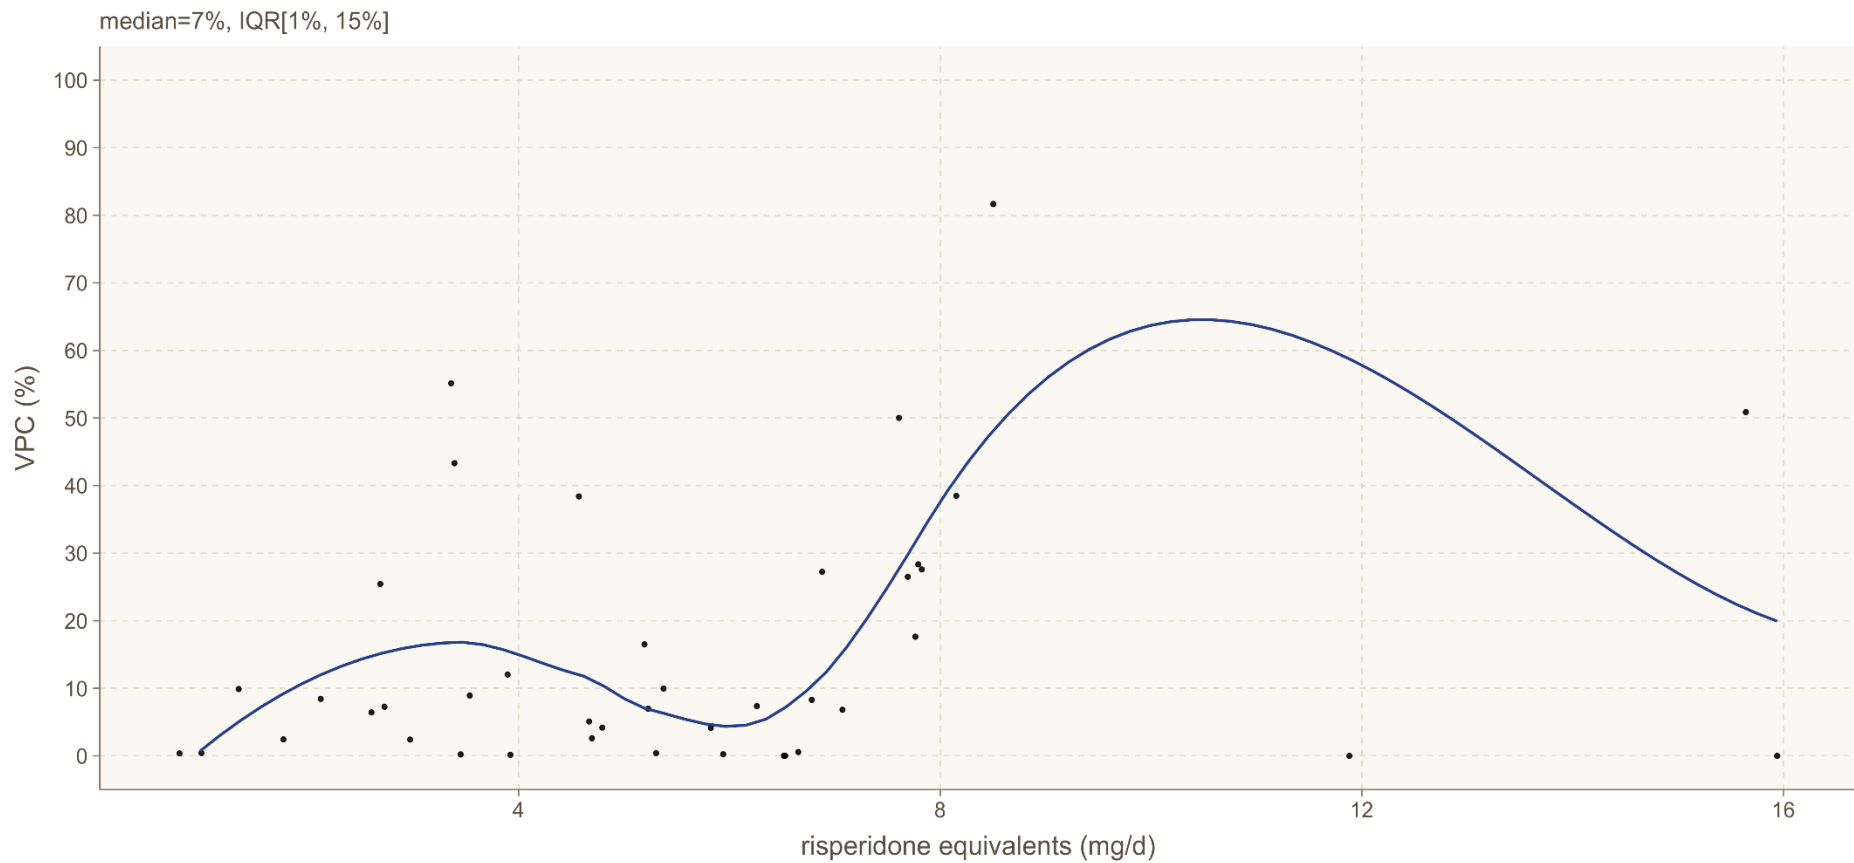

## eAppendix 6\_Variation-Partition-Coefficients – Dropouts due to adverse events

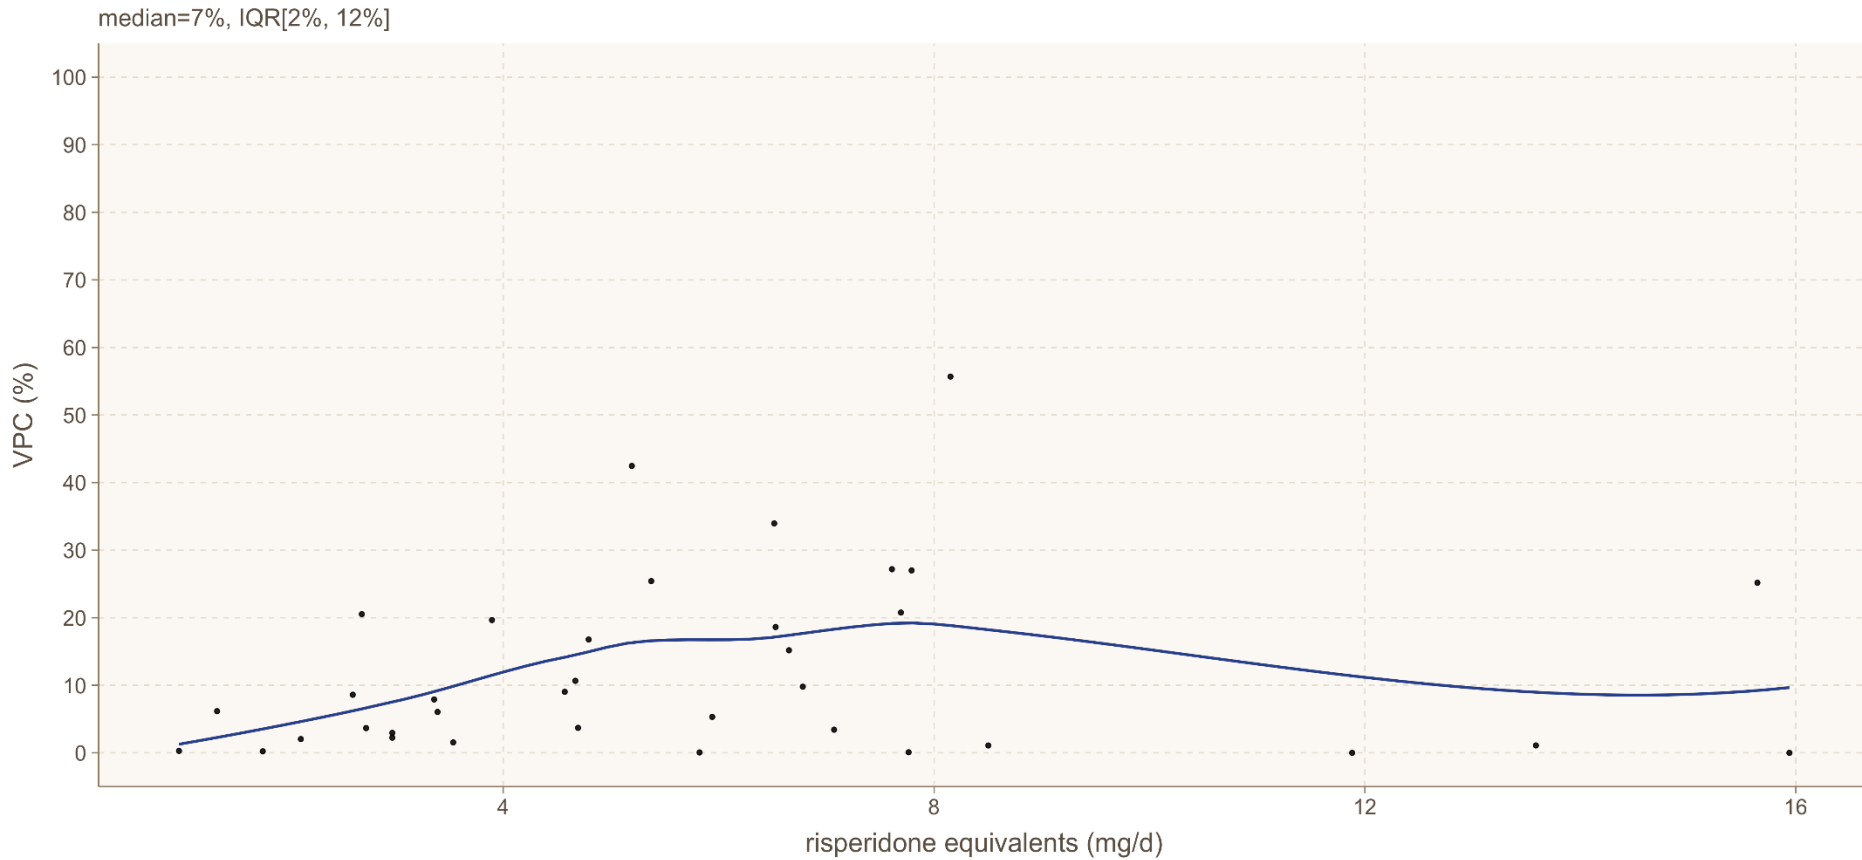

## eAppendix 6\_Variation-Partition-Coefficients – Rehospitalization

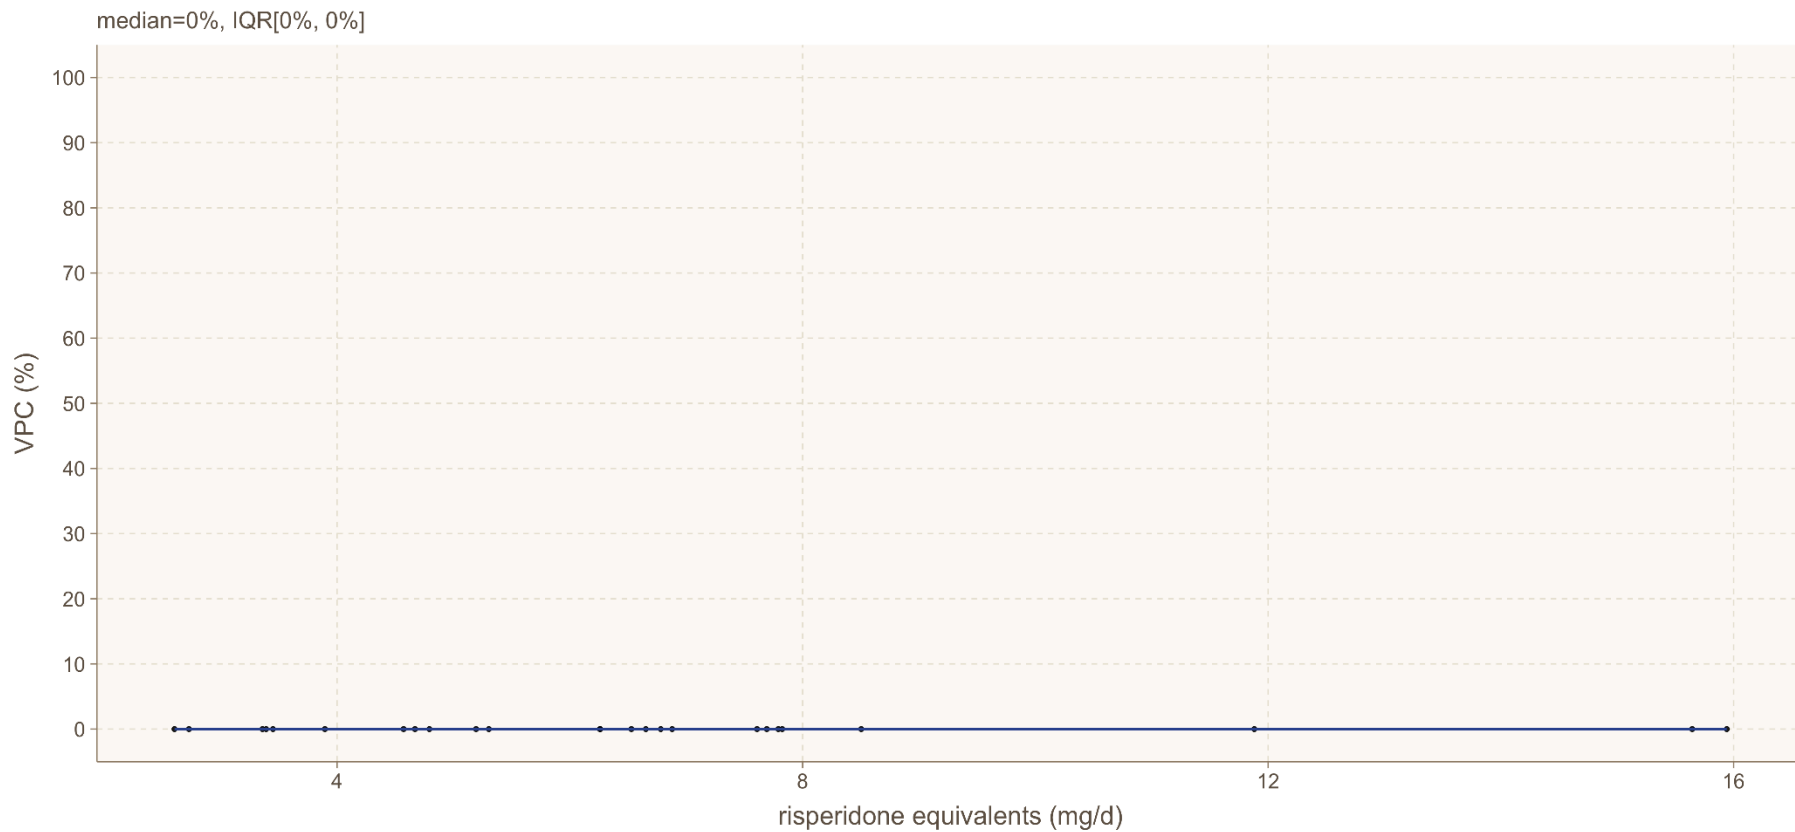

# eAppendix 6\_Variation-Partition-Coefficients – Overall symptoms

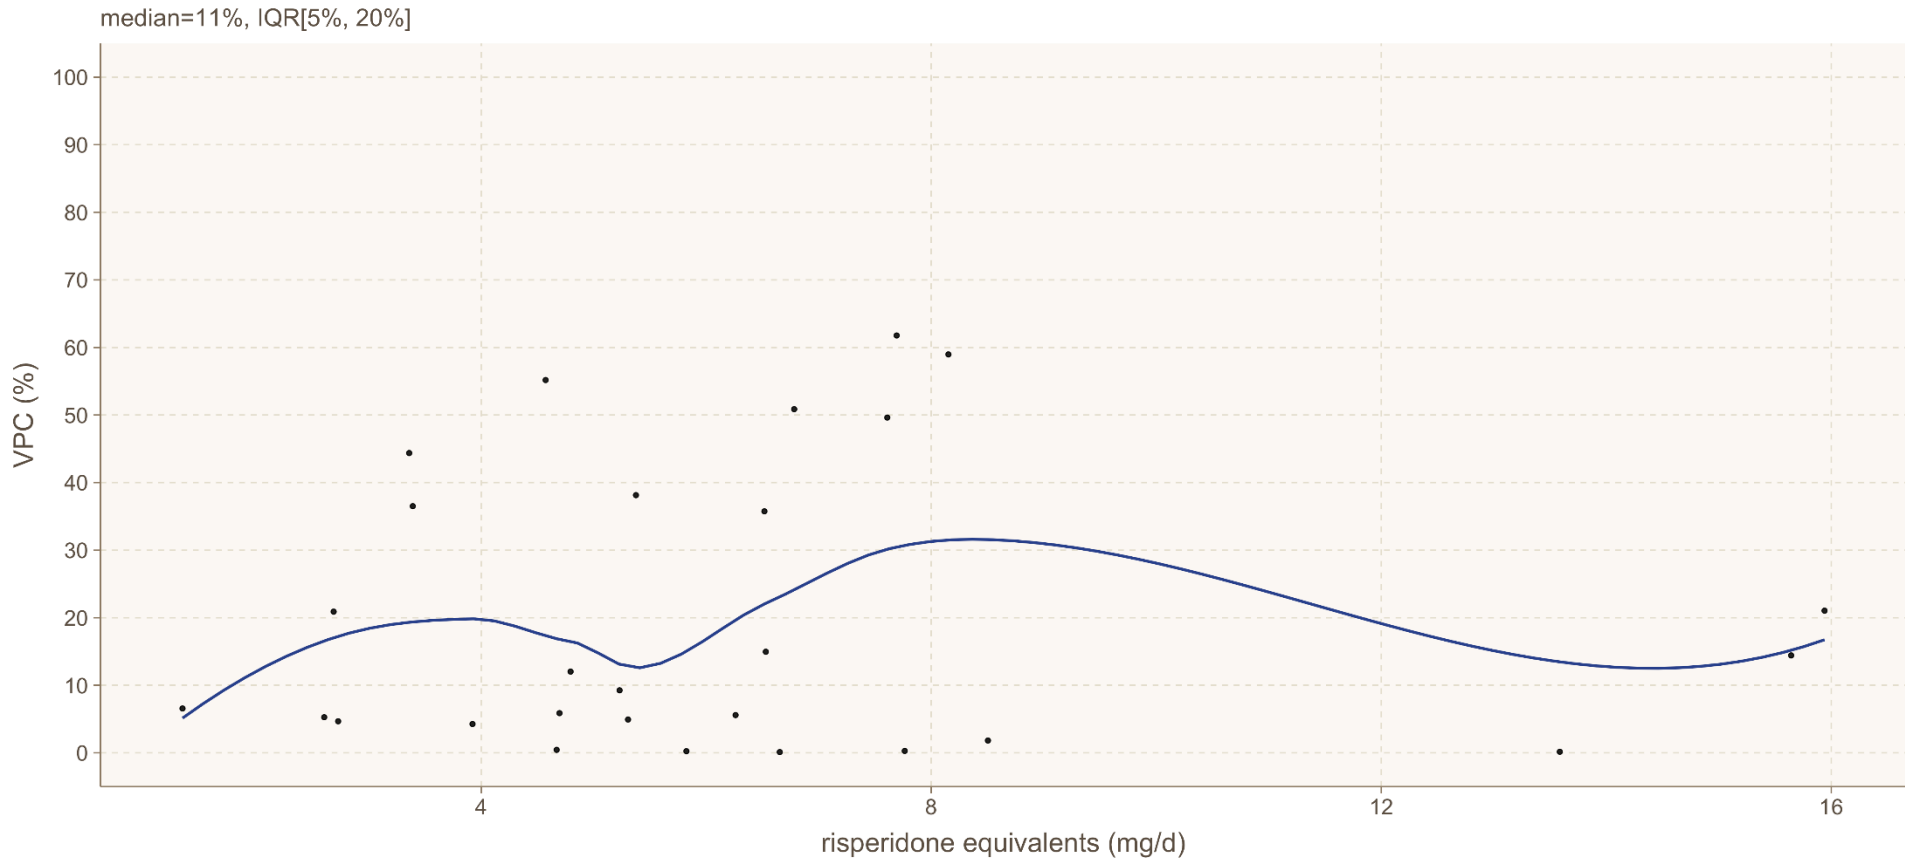

# eAppendix 6\_Contour enhanced funnel plot and Egger's test of the primary outcome (relapse)

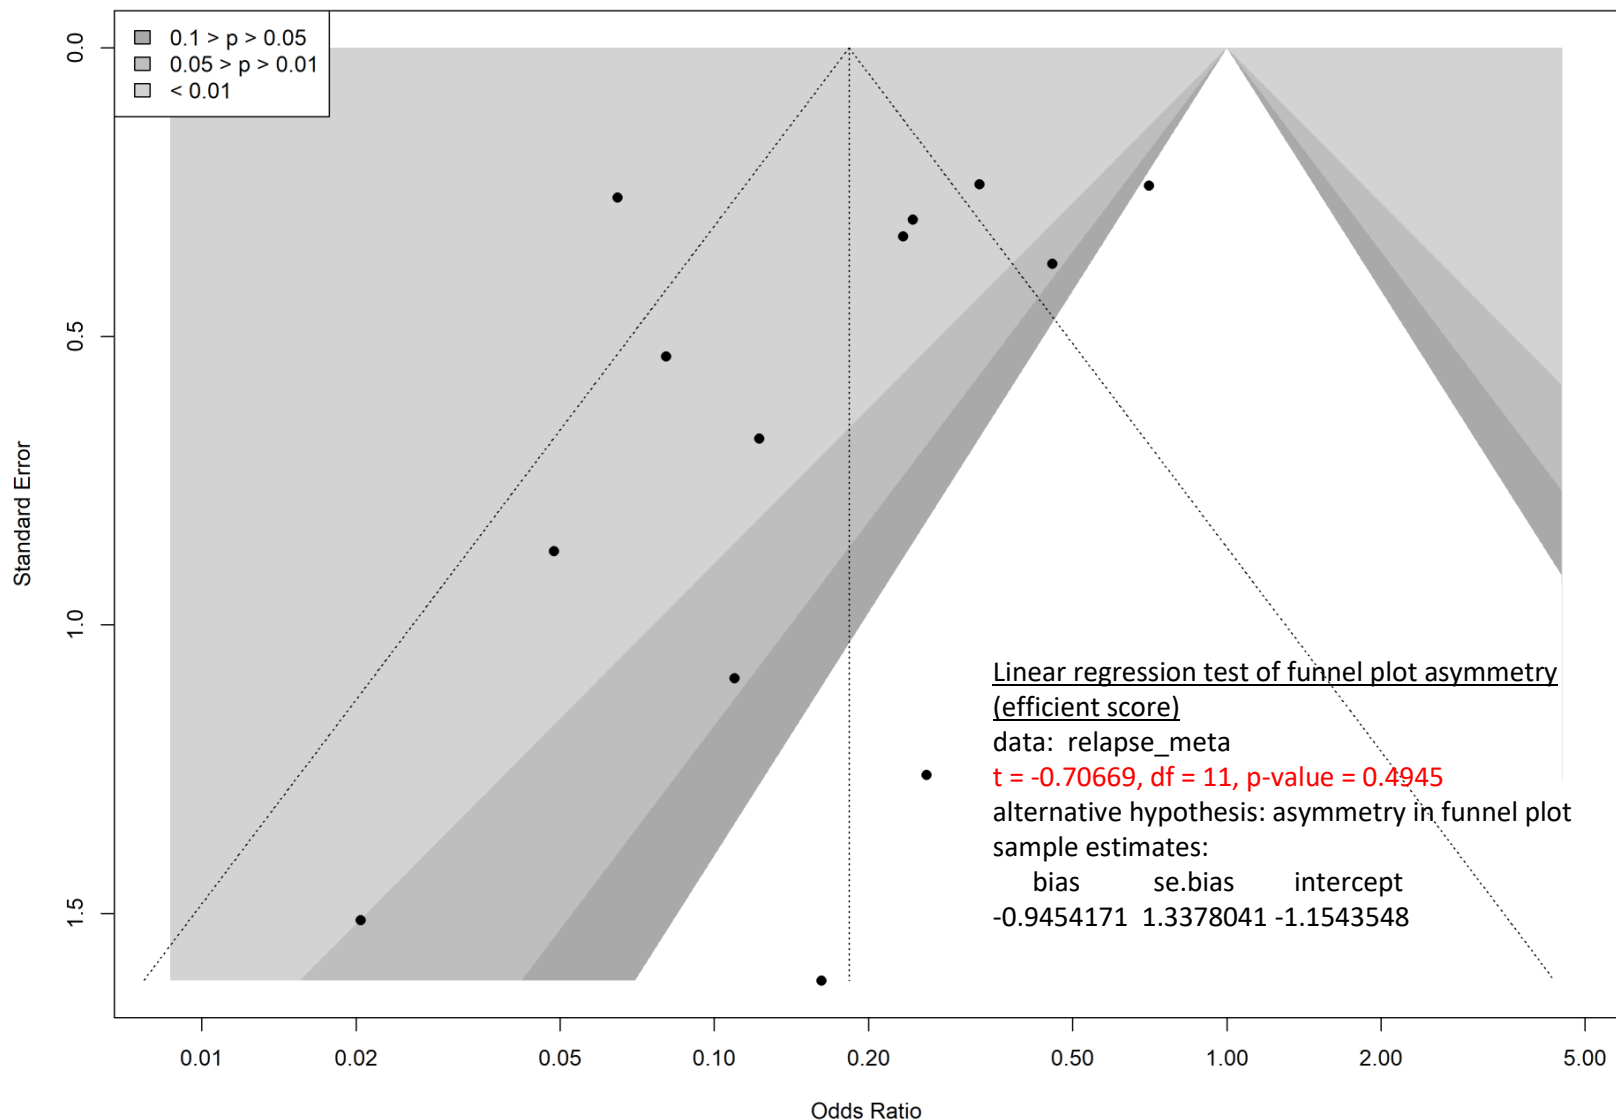



**eReference**

Crippa A, Discacciati A, Bottai M, Spiegelman D, Orsini N. One-stage dose-response meta-analysis for aggregated data. *Stat Methods Med Res.* 2019;28:1579-1596

Egger M, Davey Smith G, Schneider M, Minder C. Bias in meta-analysis detected by a simple, graphical test. *BMJ.* 1997 Sep 13;315(7109):629-34.

Peters JL, Sutton AJ, Jones DR, Abrams KR, Rushton L. Contour-enhanced meta-analysis funnel plots help distinguish publication bias from other causes of asymmetry. *J Clin Epidemiol* 2008;61:991-996

**eAppendix 7. Update of the meta-analysis of Uchida et al. 2011 and additional analyses of doses higher than standard doses ( $\geq 5$ mg risperidoneequivalent per day)**

## eAppendix 7\_A, Relapse - standard dose (= 1 Daily-Defined-Dose or higher) versus low-dose ( $\geq 50\% < 1$ DDD)

Uchida et al. 2011<sup>1</sup> had reported in a pairwise meta-analysis that standard doses (= 1 Daily-Defined-Dose) were just not statistically significantly more effective

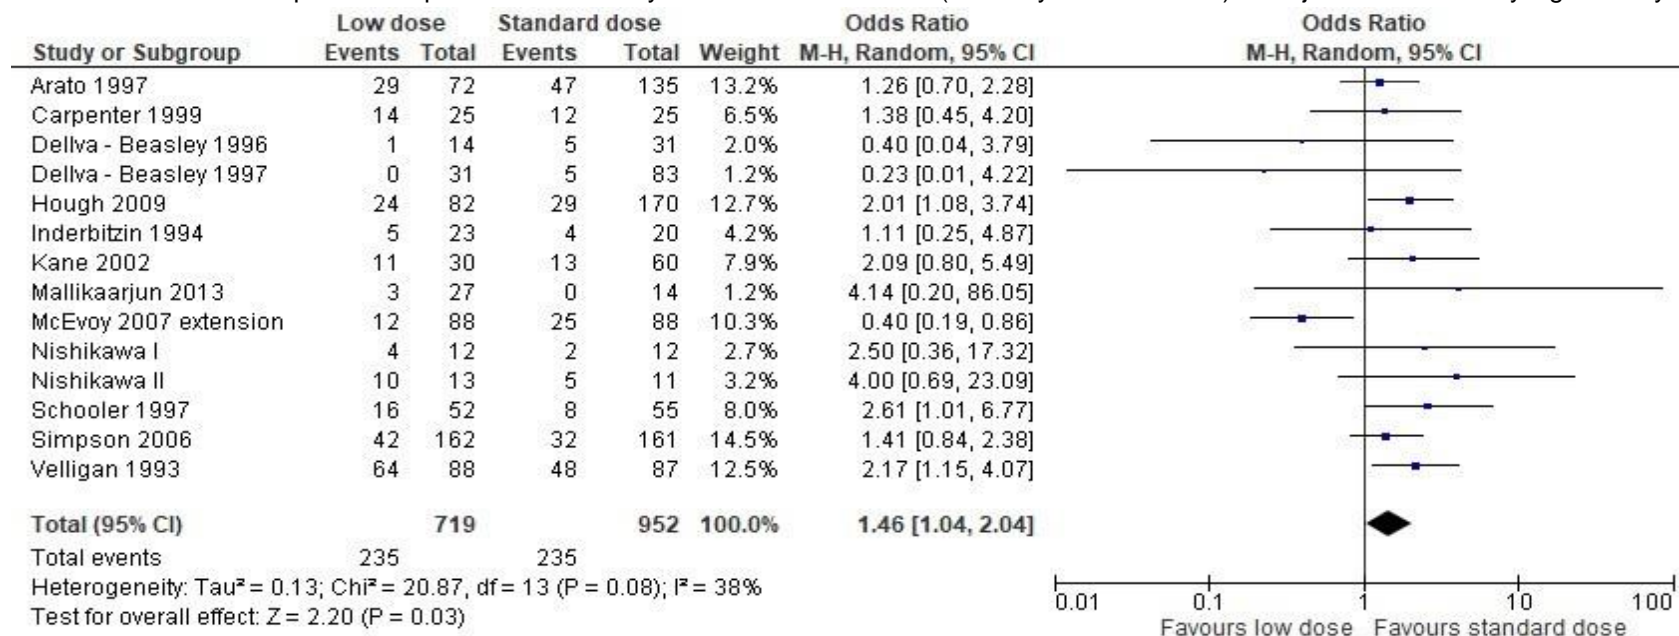

than low doses ( $\geq 50\% < 1$  DDD) for relapse prevention with antipsychotics in schizophrenia ( $p=0.05$ ). We updated their Figure 4a with new studies found by us. We also obtained additional data on studies which had already been included by them (Velligan 1993, Carpenter 1999, Beasley 1996, Beasley 1997, Hough 2009, Kane 2010, Mallikaarjun 2013, McEvoy 2007 extension). After this update standard doses outperformed low doses more clearly ( $p=0.03$ ).

### Comment

1. Minor differences in numbers between our and their analysis stem from the fact that Uchida et al. 2011<sup>1</sup> a) had several times dropout due to inefficacy/relapse for their analysis while we always used relapse if available; b) they did not always use the strict intention-to-treat (once-randomized – analyzed) population for the denominator. Moreover, in the Schooler 1997 study we used only the arms with ‘supportive’ family treatment, while they also used the arms with ‘intensive’ family treatment. Our decision was made *a priori*; and the rationale was that we were interested in the “pure” dose-effect which could have been confounded by additional intensive family treatment (or at least more than by just supportive family treatment).

2. It should be noted that the only three studies which showed an effect in favour of the low dose groups were the only continuation studies (Beasley 1996, Beasley 1997, McEvoy 2007). In this design the responders in the acute phase are followed up. Removing these studies, heterogeneity drops to an  $I^2$  of 0% and the  $p$ -value for efficacy is  $< 0.0001$ ).

3. Most importantly, it should be noted that  $p$ -values must not be overemphasized, and there is a strong movement of statisticians against them. The direction of effect in Uchida et al. 2011<sup>1</sup> was in favour of standard doses as well, just the  $p$ -value was somewhat higher (also see American Statistical Association 2016<sup>2</sup>).

## References

1. Uchida H, Suzuki T, Takeuchi H, Arenovich T, Mamo DC. Low dose vs standard dose of antipsychotics for relapse prevention in schizophrenia: meta-analysis. *Schizophr Bull.* 2011;37(4):788-799.
2. American Statistical Association. Statement on statistical significance and p-values. 2016; <https://www.amstat.org/asa/files/pdfs/p-valuestatement.pdf>

As the slope in Figure 1 of the manuscript – dose-response of the primary outcome relapse – is still slightly increasing above 5mg/day risperidone equivalent, we conducted two post-hoc analyses following reviewer comments:

1. An analysis using linear splines - as in our dose-response analysis of acute phase studies (Leucht et al. 2020) - to find out above which dose the slope of the curve does not longer increase (Figure 2 below)
2. A simple pairwise meta-analysis in which we compared doses between 3-7mg/day risperidone equivalent with higher doses (Figure 3 below)

Neither one suggested important efficacy gains at very high doses

There was no significant difference ( $p=0.48$ ). It should noted that too few 5mg doses were available, therefore we had to use a range. We tested with linear splines up to which dose the dose-response curve still showed a significantly increasing slope (post-hoc,  $p<0.1$ )

**eAppendix 7, B\_Relapse - above which dose does the slope of the dose-response curve no longer significantly increase?**

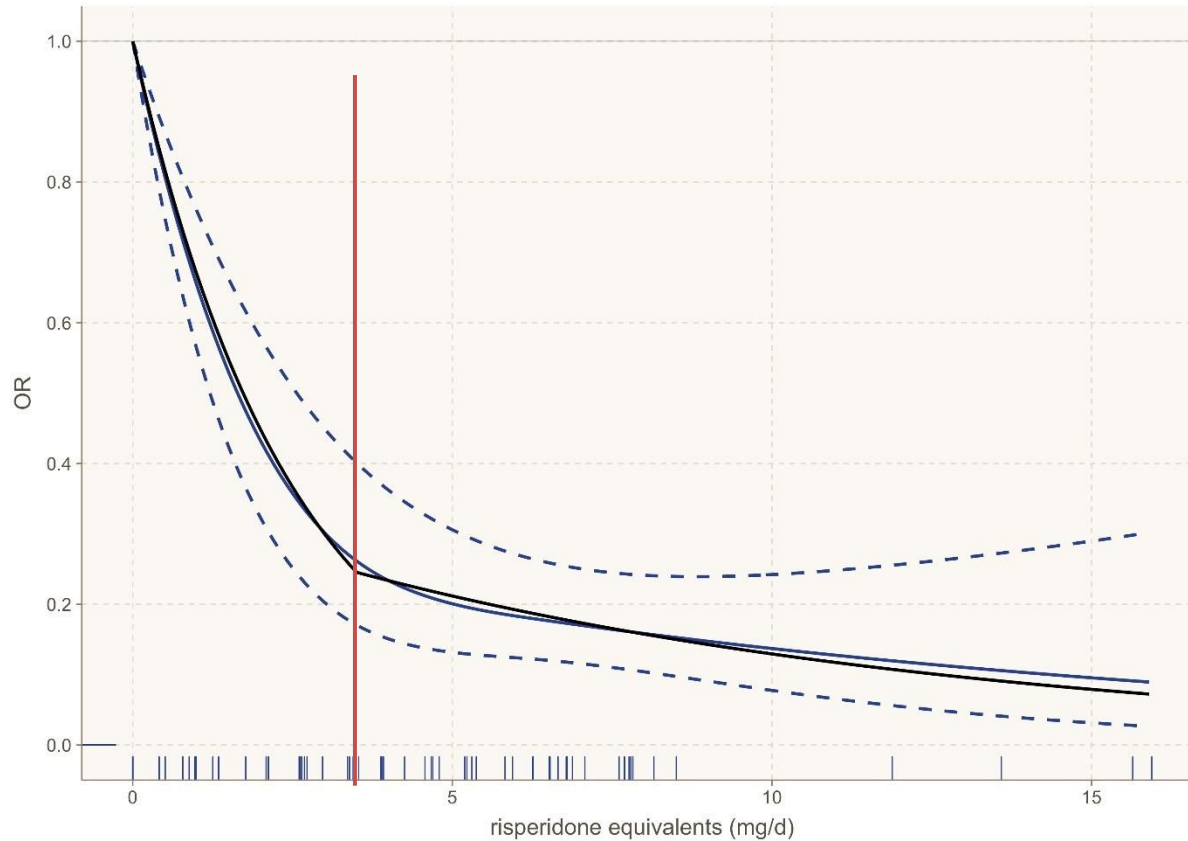

The red line represents the linear spline at 3.5 mg/day risperidone equivalents, above which dose the slope did not show a significant decrease (p.0.1). The marks on the x-axis indicate for which doses study-arms were available and how many.

**eAppendix 7\_C Pairwise meta-analysis of OR for relapse of 3-7mg/day risperidone equivalent versus more than 7mg/day**

1

| Study                                                                                       | 3-7mg/d    |       | >7mg/d     |       | Weight        | Odds Ratio<br>MH, Random, 95% CI |
|---------------------------------------------------------------------------------------------|------------|-------|------------|-------|---------------|----------------------------------|
|                                                                                             | Events     | Total | Events     | Total |               |                                  |
| Arvanitis 1993                                                                              | 64         | 88    | 59         | 128   | 22.0%         | 3.12 [1.74; 5.59]                |
| Beasley 1996b_Extension                                                                     | 5          | 31    | 3          | 10    | 11.1%         | 0.45 [0.09; 2.35]                |
| Beasley 1997_Extension                                                                      | 5          | 83    | 0          | 28    | 5.0%          | 3.99 [0.21; 74.54]               |
| Kane 2002b                                                                                  | 8          | 31    | 5          | 29    | 14.6%         | 1.67 [0.48; 5.86]                |
| Mallikaarjun 2013                                                                           | 3          | 27    | 0          | 14    | 4.8%          | 4.14 [0.20; 86.05]               |
| McEvoy 2007b_Extension                                                                      | 12         | 88    | 25         | 88    | 20.0%         | 0.40 [0.19; 0.86]                |
| Simpson 2006                                                                                | 42         | 163   | 32         | 161   | 22.6%         | 1.40 [0.83; 2.36]                |
| <b>Total (95% CI)</b>                                                                       | <b>511</b> |       | <b>458</b> |       | <b>100.0%</b> | <b>1.30 [0.63; 2.72]</b>         |
| Heterogeneity: $\tau^2 = 0.5501$ ; $\chi^2 = 20.48$ , $df = 6$ ( $P < 0.01$ ); $I^2 = 71\%$ |            |       |            |       |               |                                  |
| Test for overall effect: $Z = 0.71$ ( $P = 0.48$ )                                          |            |       |            |       |               |                                  |

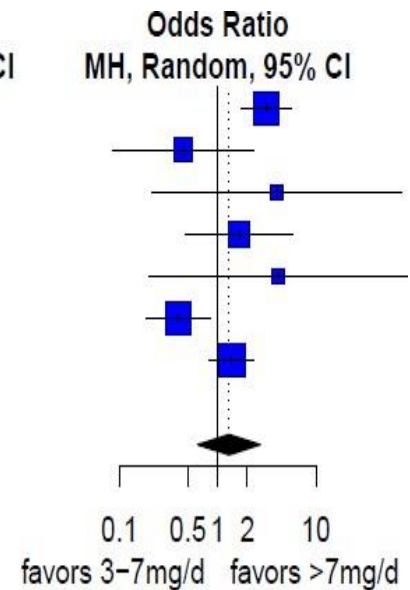

We conducted a pairwise meta-analysis in which we compared doses between 3-7mg/day risperidone equivalent with higher doses. There was no significant difference ( $p=0.48$ ). It should be noted that too few arms with exactly 5mg were available, therefore we had to use a range.

**eTable 3.** Average Dopamine Receptor Occupancies for Risperidone Doses

| Dose, mg | Dopamine receptor occupancy, % (95% CI) <sup>a</sup> |
|----------|------------------------------------------------------|
| Placebo  | 0 (0 to 0)                                           |
| 0.5      | 31 (15 to 39)                                        |
| 1.0      | 45 (31 to 56)                                        |
| 1.5      | 54 (40 to 64)                                        |
| 2.0      | 60 (47 to 69)                                        |
| 2.5      | 64 (54 to 72)                                        |
| 3.0      | 68 (59 to 75)                                        |
| 3.5      | 71 (62 to 77)                                        |
| 4.0      | 73 (65 to 78)                                        |
| 4.5      | 74 (67 to 80)                                        |
| 5.0      | 76 (69 to 82)                                        |
| 5.5      | 78 (71 to 83)                                        |
| 6.0      | 79 (72 to 84)                                        |
| 6.5      | 79 (73 to 84)                                        |
| 7.0      | 80 (73 to 85)                                        |
| 7.5      | 81 (74 to 86)                                        |
| 8.0      | 82 (74 to 86)                                        |
| 8.5      | 82 (75 to 87)                                        |
| 9.0      | 83 (75 to 88)                                        |
| 9.5      | 83 (76 to 88)                                        |
| 10.0     | 84 (76 to 89)                                        |
| 15.0     | 86 (77 to 92)                                        |

<sup>a</sup>Data on dopamine occupancy per risperidone dose were taken from the meta-analysis by Lako et al for use in the discussion section. The median and interquartile ranges for study durations for the various outcomes were as follows: relapse, 48.0 (interquartile range [IQR], 33.0-52.0) months; rehospitalization, 52.00 (IQR, 46.00-52.00) months; efficacy, 46.00 (IQR, 26.00-52.00) months; all-cause discontinuation, 48.00 (IQR, 28.00-52.00) months; and dropout due to adverse events, 46.00 (IQR, 38.00-52.00).

eReference

Lako IM, van den Heuvel ER, Knegtering H, Bruggeman R, Taxis K. Estimating dopamine D2 receptor occupancy for doses of 8 antipsychotics: a meta-analysis. *J Clin Psychopharmacol.* 2013;33(5):675-681.
